# Supplementary material for: Trifluoroethanol promoted formal nucleophilic substitution of indol-2-yl diaryl methanol for the synthesis of tetraarylmethanes
Source: Royal Society of Chemistry journal article supplement (doi:10.1039/d4cc03420a), 2024-01-01
Supplement: d4cc03420a1.pdf [file d4cc03420a1.pdf]

## Supplementing Information

### Trifluoroethanol Promoted Formal Nucleophilic Substitution of Indol-2-yl

#### Diaryl Methanol for the Synthesis of Tetraarylmethanes

Cuicui Nian,<sup>a</sup> Run Yu,<sup>a</sup> Zhengyu Han,<sup>a</sup> Yang Bai,<sup>c</sup> Jianhao Wang,<sup>c</sup> Jianwei

Sun,<sup>b,\*</sup> Hai Huang<sup>a,\*</sup>

<sup>a</sup> *Jiangsu Key Laboratory of Advanced Catalytic Materials & Technology, School of Petrochemical Engineering, Changzhou University, Changzhou P. R. China*

<sup>b</sup> *Department of Chemistry, The Hong Kong University of Science and Technology, Clear Water Bay, Kowloon, Hong Kong SAR R. R. China*

<sup>c</sup> *School of Pharmacy, Changzhou University, Changzhou, P. R. China*

### Table of Contents

|                                                                   |            |
|-------------------------------------------------------------------|------------|
| <b>I. General Information .....</b>                               | <b>S2</b>  |
| <b>II. Preparation of Substrates .....</b>                        | <b>S3</b>  |
| <b>III. The Synthesis of Tetraarylmethanes .....</b>              | <b>S13</b> |
| <b>IV. Gram-scale Synthesis and Bioactivity of Products .....</b> | <b>S37</b> |
| <b>V. Determination of Product Structure .....</b>                | <b>S40</b> |

NMR spectra

## I. General Information

Flash column chromatography was performed over silica gel (200-300 mesh) purchased from Qindao Puke Co. Lit., China. All air or moisture sensitive reactions were conducted in oven-dried glassware under nitrogen atmosphere using anhydrous solvents. Anhydrous toluene, acetonitrile, dichloromethane, chloroform, dimethyl sulfoxide and tetrahydrofuran were purified by the Innovative® solvent purification system. Other anhydrous solvents and substrates **1a-1l** were purchased from J&K Scientific. <sup>1</sup>H, <sup>13</sup>C and <sup>19</sup>F NMR spectra were collected on a Bruker AV 400 MHz NMR spectrometer or a Bruker AV 300 MHz NMR spectrometer using residue solvent peaks as an internal standard (<sup>1</sup>H NMR: CDCl<sub>3</sub> at 7.26 ppm; <sup>13</sup>C NMR: CDCl<sub>3</sub> at 77.16 ppm). Mass spectra were collected on an Agilent GC/MS 5975C system, a MALDI Micro MX mass spectrometer, or an API QSTAR XL System. The X-ray data was collected by SuperNova, Dual, Cu at zero, Atlas diffractometer.

## II. Preparation of Substrates

Substrates **1a-1o** were synthesized according to our previous procedure.<sup>[1]</sup> **1m-1o** are unknown compounds,

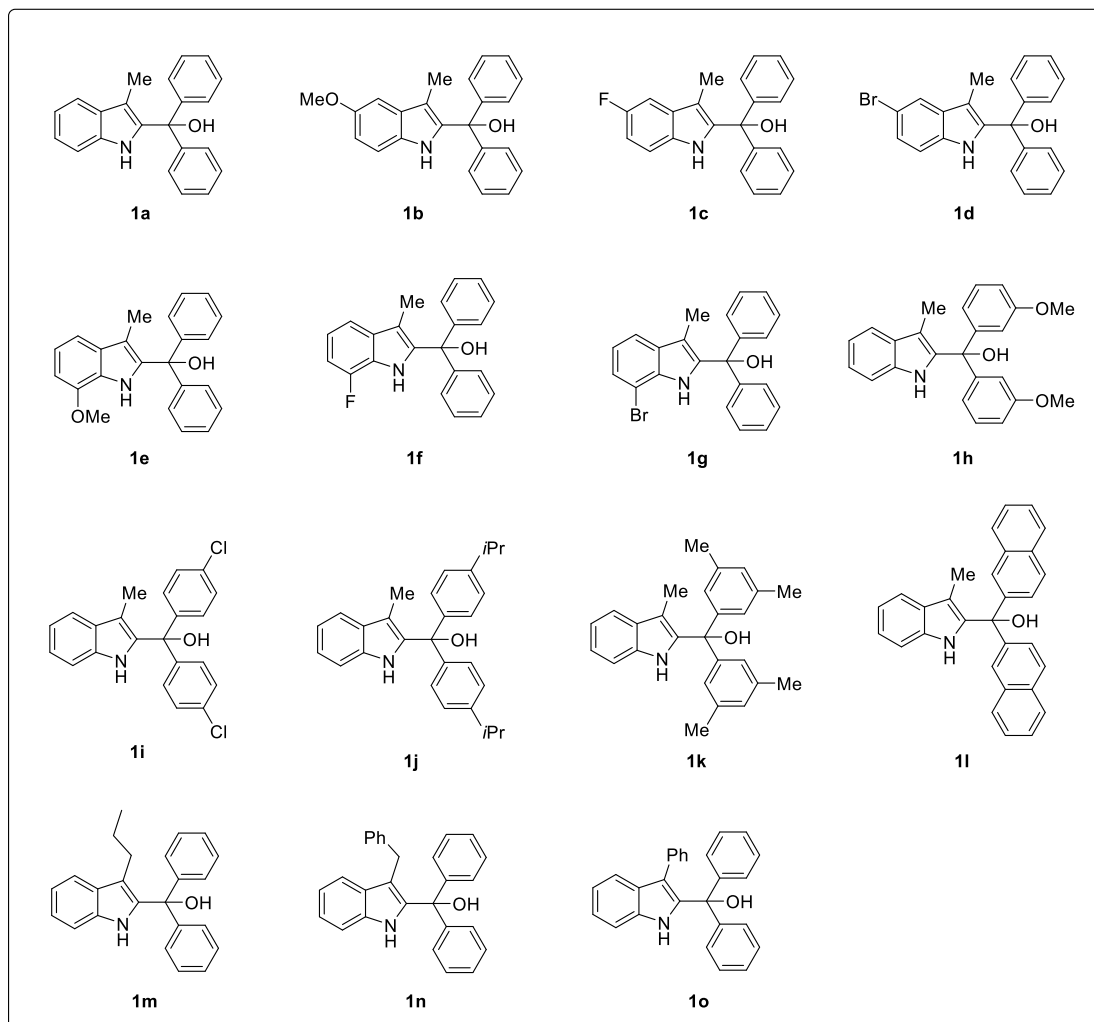

[1] J. Wang, R. Yu, C. Nian, M. Liao, Z. Han, J. Sun and H. Huang, *Org. Lett.* 2023, **25**, 8478-8483.

## General Procedure A for the Preparation of Indol-2-yl Methanols 1a-1o.

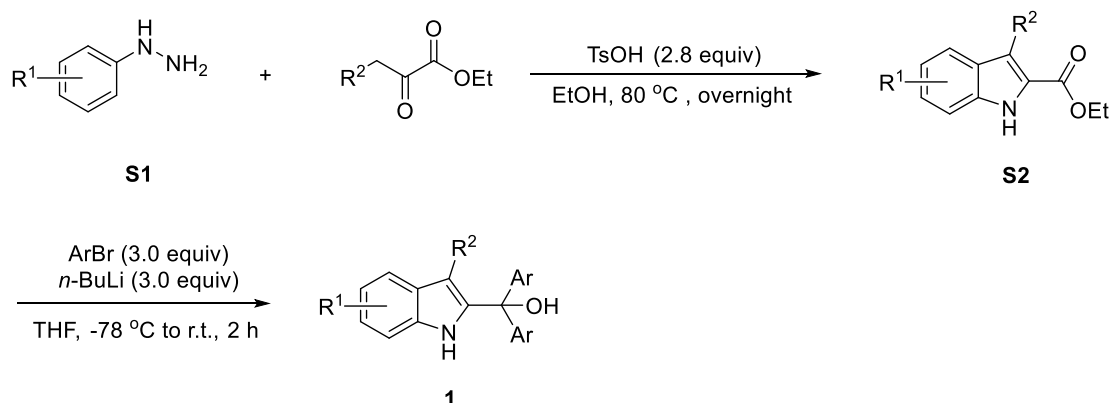

To a solution of ethyl 2-oxobutanoate (1.43 g, 11.0 mmol, 1.1 equiv), arylhydrazines **S1** (10.0 mmol, 1.0 equiv) in anhydrous EtOH (30 mL) was added TsOH (5.33 g, 28.0 mmol, 2.8 equiv). The reaction mixture was heated to reflux on an oil bath and stirred for 12 h. The resulting precipitate was filtered off and washed with EtOH. The combined filtrate was concentrated to give a residue that was dissolved in 1:1 EtOAc: Et<sub>2</sub>O (40 mL) and washed with 10 % aq. Na<sub>2</sub>CO<sub>3</sub> (30 mL × 2), dried over Na<sub>2</sub>SO<sub>4</sub> and concentrated under reduced pressure. The residue was purified by silica gel column chromatography (eluent: petroleum ether/EtOA) to afford the desired compounds **S2**.

Under N<sub>2</sub> at -78 °C, to a solution of ArBr (18.3 mmol, 6.1 equiv) in THF (40 mL) was added a solution of *n*-BuLi (2.4 M in *n*-hexane, 7.5 mL, 18.0 mmol, 6.0 equiv) dropwise. Then the reaction mixture was stirred at -78 °C for 30 min. The solution of **S2** (3 mmol, 1.0 equiv) in anhydrous THF (10 mL) was added at -78 °C *via* syringe. Then the reaction mixture was warmed to room temperature and stirred for 1 h. The reaction mixture was quenched with aqueous NH<sub>4</sub>Cl

solution (20 mL) and extracted with ethyl acetate (30 mL × 3). The combined organic layers were washed with water (30 mL × 2), dried over anhydrous Na<sub>2</sub>SO<sub>4</sub>, and concentrated under reduced pressure. The residue was purified by silica gel column chromatography (petroleum ether/EtOAc) to afford the desired indol-2-yl methanols **1**.

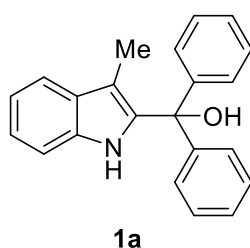

**(3-Methyl-1H-indol-2-yl)diphenylmethanol (1a)** was prepared according to the General Procedure A as a white solid (chromatography eluent: petroleum ether/EtOAc = 4:1) in 99% yield (930.8 mg).

<sup>1</sup>H NMR (400 MHz, CDCl<sub>3</sub>) δ 8.07 (s, 1H), 7.55 (d, *J* = 7.8 Hz, 1H), 7.37–7.32 (m, 10H), 7.24 (s, 1H), 7.17 (td, *J*<sub>1</sub> = 1.1 Hz, *J*<sub>2</sub> = 7.0 Hz, 1H), 7.13–7.10 (m, 1H), 2.99 (s, 1H), 1.87 (s, 3H) ppm.

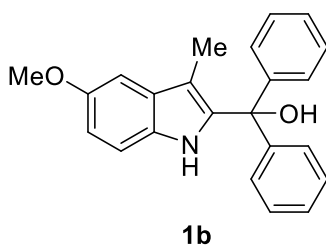

**(5-Methoxy-3-methyl-1H-indol-2-yl)diphenylmethanol (1b)** was prepared according to the General Procedure A as a brown solid (chromatography eluent: petroleum ether/EtOAc = 6:1) in 99% yield (1.02 g).

$^1\text{H}$  NMR (400 MHz,  $\text{CDCl}_3$ )  $\delta$  7.94 (s, 1H), 7.37–7.31 (m, 10H), 7.24 (s, 1H), 7.15 (d,  $J = 2.3$  Hz, 1H), 6.84 (dd,  $J_1 = 2.4$  Hz,  $J_2 = 8.8$  Hz, 1H), 3.87 (s, 3H), 3.01 (s, 1H), 1.87 (s, 3H) ppm.

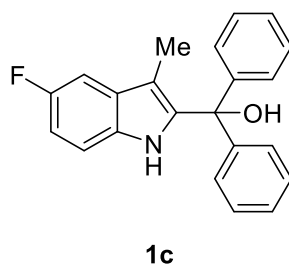

**(5-Fluoro-3-methyl-1H-indol-2-yl)diphenylmethanol (1c)** was prepared according to the General Procedure A as a white solid (chromatography eluent: petroleum ether/EtOAc = 4:1) in 90% yield (894.8 mg).

$^1\text{H}$  NMR (400 MHz,  $\text{CDCl}_3$ )  $\delta$  8.11 (s, 1H), 7.36 (s, 10H), 7.19–7.14 (m, 2H), 6.91 (td,  $J_1 = 2.4$  Hz,  $J_2 = 9.2$  Hz, 1H), 3.00 (s, 1H), 1.84 (s, 3H) ppm.

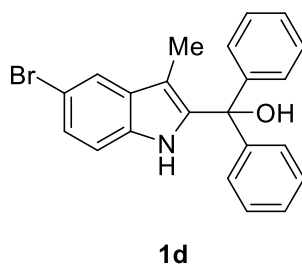

**(5-Bromo-3-methyl-1H-indol-2-yl)diphenylmethanol (1d)** was prepared according to the General Procedure A as a white solid (chromatography eluent: petroleum ether/EtOAc = 4:1) in 91% yield (1071.0 mg).

$^1\text{H}$  NMR (400 MHz,  $\text{CDCl}_3$ )  $\delta$  8.19 (s, 1H), 7.66 (d,  $J = 1.6$  Hz, 1H), 7.39–7.32 (m, 10H), 7.24 (dd,  $J_1 = 1.8$  Hz,  $J_2 = 8.6$  Hz, 1H), 7.13 (d,  $J = 8.5$  Hz, 1H), 2.99 (s, 1H),

1.81 (s, 3H) ppm.

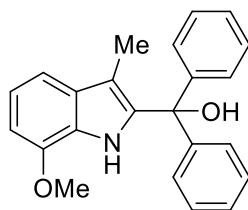

**1e**

**(7-Methoxy-3-methyl-1H-indol-2-yl)diphenylmethanol (1e)** was prepared according to the General Procedure A as a white solid (chromatography eluent: petroleum ether/EtOAc = 8:1) in 15% yield (154.5 mg).

$^1\text{H NMR}$  (400 MHz,  $\text{CDCl}_3$ )  $\delta$  8.45 (s, 1H), 7.39–7.31 (m, 10H), 7.17 (d,  $J = 8.0$  Hz, 1H), 7.05 (t,  $J = 7.8$  Hz, 1H), 6.64 (d,  $J = 7.6$  Hz, 1H), 3.88 (s, 3H), 3.12 (s, 1H), 1.86 (s, 3H) ppm.

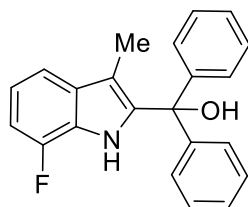

**1f**

**(7-Fluoro-3-methyl-1H-indol-2-yl)diphenylmethanol (1f)** was prepared according to the General Procedure A as a white solid (chromatography eluent: petroleum ether/EtOAc = 5:1) in 84% yield (835.1 mg).

$^1\text{H NMR}$  (400 MHz,  $\text{CDCl}_3$ )  $\delta$  8.35 (s, 1H), 7.37 (s, 10H), 7.30 (d,  $J = 7.9$  Hz, 1H), 7.05–6.99 (m, 1H), 6.89 (dd,  $J_1 = 7.8$  Hz,  $J_2 = 11.2$  Hz, 1H), 3.00 (s, 1H), 1.86 (s, 3H) ppm.

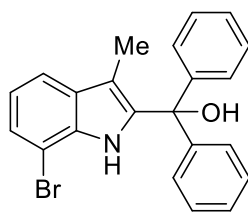

**1g**

**(7-Bromo-3-methyl-1H-indol-2-yl)diphenylmethanol (1g)** was prepared according to the General Procedure A as a white solid (chromatography eluent: petroleum ether/EtOAc = 4:1) in 91% yield (1070.9 mg).

$^1\text{H NMR}$  (400 MHz,  $\text{CDCl}_3$ )  $\delta$  8.42 (s, 1H), 7.47 (d,  $J = 7.9$  Hz, 1H), 7.39–7.32 (m, 11H), 6.99 (t,  $J = 7.76$  Hz, 1H), 3.01 (s, 1H), 1.81 (s, 3H) ppm.

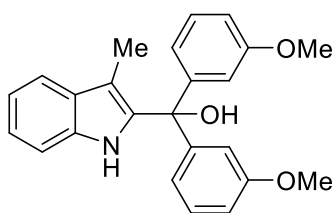

**1h**

**Bis(3-methoxyphenyl)(3-methyl-1H-indol-2-yl)methanol (1h)** was prepared according to the General Procedure A as a pink solid (chromatography eluent petroleum ether/EtOAc = 5:1) in 99% yield (1109.1 mg).

$^1\text{H NMR}$  (400 MHz,  $\text{CDCl}_3$ )  $\delta$  8.04 (s, 1H), 7.53 (d,  $J = 7.5$  Hz, 1H), 7.25–7.22 (m, 3H), 7.16 (td,  $J_1 = 1.2$  Hz,  $J_2 = 7.0$  Hz, 1H), 7.12–7.08 (m, 1H), 6.98 (t,  $J = 1.9$  Hz, 2H), 6.92–6.90 (m, 2H), 6.86–6.84 (m, 2H), 3.74 (s, 6H), 3.00 (s, 1H), 1.93 (s, 3H) ppm.



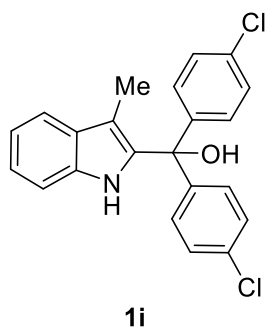

**Bis(4-chlorophenyl)(3-methyl-1H-indol-2-yl)methanol (1i)** was prepared according to the General Procedure A as a brown solid (chromatography eluent: petroleum ether/EtOAc = 4:1) in 43% yield (493.4 mg).

$^1\text{H NMR}$  (400 MHz,  $\text{CDCl}_3$ )  $\delta$  8.00 (s, 1H), 7.55 (d,  $J = 7.8$  Hz, 1H), 7.35–7.27 (m, 9H), 7.20 (td,  $J_1 = 1.1$  Hz,  $J_2 = 7.0$  Hz, 1H), 7.16–7.12 (m, 1H), 3.00 (s, 1H), 1.90 (s, 3H) ppm.

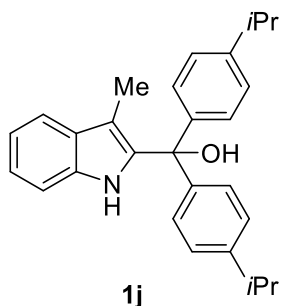

**Bis(4-isopropylphenyl)(3-methyl-1H-indol-2-yl)methanol (1j)** was prepared according to the General Procedure A as a white solid (chromatography eluent: petroleum ether/EtOAc = 6:1) in 74% yield (888.0 mg).

$^1\text{H NMR}$  (400 MHz,  $\text{CDCl}_3$ )  $\delta$  8.17 (s, 1H), 7.55 (d,  $J = 7.8$  Hz, 1H), 7.28–7.09 (m, 11H), 2.96–2.84 (m, 3H), 1.87 (s, 3H), 1.27 (d,  $J = 6.9$  Hz, 12H) ppm.

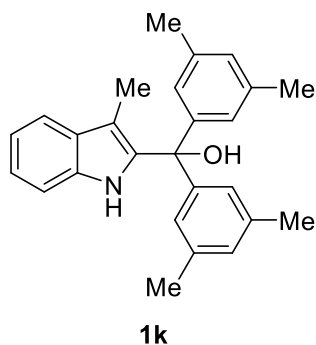

**Bis(3,5-dimethylphenyl)(3-methyl-1H-indol-2-yl)methanol (1k)** was prepared according to the General Procedure A as a white solid (chromatography eluent: petroleum ether/EtOAc = 4:1) in 79% yield (878.3 mg). <sup>1</sup>H NMR (400 MHz, CDCl<sub>3</sub>) δ 8.03 (s, 1H), 7.57 (d, *J* = 7.7 Hz, 1H), 7.28 (d, *J* = 7.9 Hz, 1H), 7.19 (td, *J*<sub>1</sub> = 1.1 Hz, *J*<sub>2</sub> = 7.1 Hz, 1H), 7.15-7.11 (m, 1H), 6.99 (s, 4H), 6.98 (s, 2H), 2.89 (s, 1H), 2.30 (s, 12H), 1.95 (s, 3H) ppm.

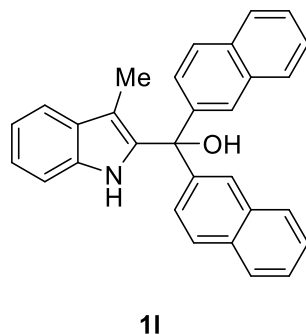

**(3-Methyl-1H-indol-2-yl)di(naphthalen-2-yl)methanol (1l)** was prepared according to the General Procedure A as a yellow solid (chromatography eluent: petroleum ether/EtOAc = 6:1) in 78% yield ( 967.4 mg). <sup>1</sup>H NMR (400 MHz, CDCl<sub>3</sub>) δ 8.14 (s, 1H), 7.90-7.86 (m, 6H), 7.79 (d, *J* = 7.8 Hz, 2H), 7.64-7.60 (m, 3H), 7.57-7.49 (m, 4H), 7.29-7.17 (m, 3H), 3.26 (s, 1H), 2.00 (s, 3H) ppm.

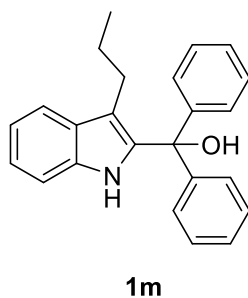

**Diphenyl(3-propyl-1H-indol-2-yl)methanol (1m)** was prepared according to the General Procedure A as a white solid (chromatography eluent: petroleum ether/EtOAc = 30:1) in 34% yield (348.3 mg).

M.P. 188-189 °C.

<sup>1</sup>H NMR (400 MHz, CDCl<sub>3</sub>) δ 8.04 (s, 1H), 7.53 (d, *J* = 7.7 Hz, 1H), 7.30-7.26 (m, 10H), 7.17-7.03 (m, 3H), 3.06 (s, 1H), 2.23-2.19 (m, 2H), 1.31-1.21 (m, 2H), 0.66 (t, *J* = 7.3 Hz, 3H) ppm.

<sup>13</sup>C NMR (100 MHz, CDCl<sub>3</sub>) δ 145.3, 137.1, 134.4, 129.4, 128.3, 128.0, 127.8, 122.1, 119.4, 119.2, 114.4, 111.0, 79.5, 27.1, 23.7, 14.7 ppm.

HRMS (ES<sup>+</sup>) Calcd for C<sub>24</sub>H<sub>24</sub>NO [M + H]<sup>+</sup>: 342.1858, Found: 342.1852.

IR ν (KBr, cm<sup>-1</sup>) 3446, 3057, 2956, 292, 2867, 1683, 1490, 144, 133, 1001.

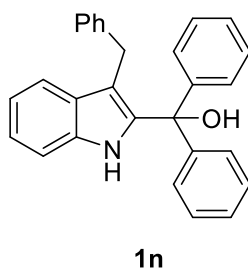

**(3-Benzyl-1H-indol-2-yl)diphenylmethanol (1n)** was prepared according to the General Procedure A as a white solid (chromatography eluent: petroleum ether/EtOAc = 15:1) in 67% yield (782.9 mg).

M.P. 204-205 °C.

$^1\text{H NMR}$  (400 MHz,  $\text{CDCl}_3$ )  $\delta$  8.01 (s, 1H), 7.46-7.28 (m, 12H), 7.22-7.07 (m, 5H), 6.98 (d,  $J = 6.4$  Hz, 2H), 3.85 (s, 2H), 2.88 (d,  $J = 2.4$  Hz, 1H) ppm.

$^{13}\text{C NMR}$  (100 MHz,  $\text{CDCl}_3$ )  $\delta$  144.9, 141.3, 138.7, 134.3, 129.8, 128.42, 128.39, 128.30, 127.99, 127.6, 125.8, 122.3, 119.7, 119.6, 111.9, 111.1, 79.1, 30.5 ppm.

**HRMS** (ES+) Calcd for  $\text{C}_{28}\text{H}_{24}\text{NO}$   $[\text{M} + \text{H}]^+$ : 390.1858, Found: 390.1862.

**IR**  $\nu$  (KBr,  $\text{cm}^{-1}$ ) 3561, 3443, 1491, 1447, 1324, 1026.

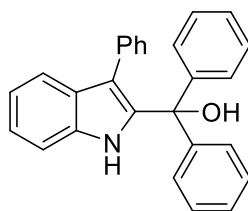

**1o**

**Diphenyl(3-phenyl-1H-indol-2-yl)methanol (1o)** was prepared according to the General Procedure A as a white solid (chromatography eluent: petroleum ether/EtOAc = 8:1) in 75% yield (844.8 mg).

M.P. 233-234 °C.

$^1\text{H NMR}$  (400 MHz,  $\text{CDCl}_3$ )  $\delta$  7.84 (s, 1H), 7.46 (d,  $J = 7.9$  Hz, 1H), 7.30-7.26 (m, 11H), 7.22-7.18 (m, 4H), 7.15-7.09 (m, 3H), 3.25 (s, 1H) ppm.

$^{13}\text{C NMR}$  (100 MHz,  $\text{CDCl}_3$ )  $\delta$  145.7, 138.3, 134.7, 134.2, 130.5, 129.5, 128.5, 128.3, 128.0, 127.8, 126.8, 122.6, 120.3, 119.7, 115.1, 111.0, 79.9 ppm.

**HRMS** (ES+) Calcd for  $\text{C}_{27}\text{H}_{22}\text{NO}$   $[\text{M} + \text{H}]^+$ : 376.1701, Found: 376.1698.

**IR**  $\nu$  (KBr,  $\text{cm}^{-1}$ ) 3540, 3465, 3056, 1489, 1450, 1329, 1282, 1172, 1158.

### III. The Synthesis of Tetraarylmethanes

#### General Procedure B for the Synthesis of Tetraarylmethanes **3** or **4**.

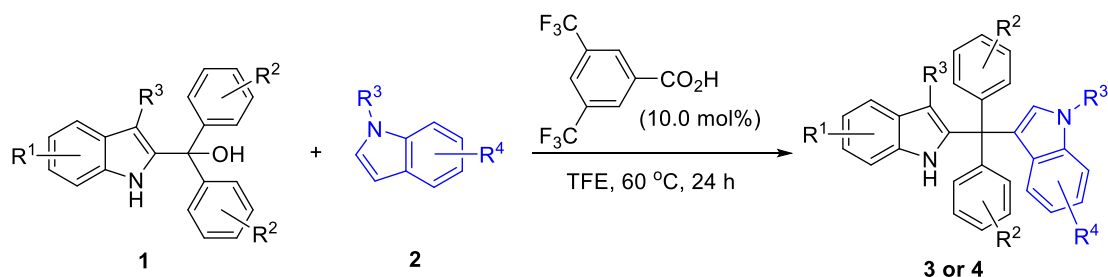

To a solution of indol-2-yl methanols **1** (0.3 mmol, 1.0 equiv), indoles **2** (0.6 mmol, 2.0 equiv) in CF<sub>3</sub>CH<sub>2</sub>OH (3.0 mL) was added 3,5-bis(trifluoromethyl)benzoic acid (7.7 mg, 0.03 mmol, 10.0 mol%). The reaction mixture was warmed up to 60 °C and kept stirring for 24 h. The reaction mixture was directly concentrated under reduced pressure. The residue was purified by silica gel column chromatography (eluent: petroleum ether/DCM or petroleum ether/EtOAc) to afford the desired products **3** or **4**.

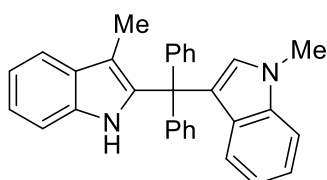

**3a**

**1-Methyl-3-((3-methyl-1H-indol-2-yl)diphenylmethyl)-1H-indole (3a)** was prepared according to the General Procedure B as a white solid (chromatography eluent: petroleum ether/DCM = 24:1) in 88% yield (112.3 mg). M.P. 231-232 °C.

<sup>1</sup>H NMR (400 MHz, CDCl<sub>3</sub>) δ 8.12 (s, 1H), 7.55 (d, *J* = 5.0 Hz, 1H), 7.35-7.28 (m, 11H), 7.20 (t, *J* = 7.8 Hz, 2H), 7.16-7.12 (m, 2H), 6.85 (t, *J* = 7.8 Hz, 1H), 6.73 (s,

1H), 6.70 (d,  $J = 8.2$  Hz, 1H), 3.76 (s, 3H), 1.67 (s, 3H) ppm.

$^{13}\text{C}$  NMR (100 MHz,  $\text{CDCl}_3$ )  $\delta$  144.5, 138.7, 138.0, 133.7, 130.6, 130.3, 130.1, 127.9, 127.5, 126.6, 122.0, 121.8, 121.2, 120.5, 119.4, 119.1, 118.3, 110.8, 109.4, 109.2, 55.3, 33.0, 10.3 ppm.

HRMS (ES+) Calcd for  $\text{C}_{31}\text{H}_{26}\text{N}_2\text{Na}$  [ $\text{M} + \text{Na}$ ] $^+$ : 449.1994, Found: 449.1998.

IR  $\nu$  (KBr,  $\text{cm}^{-1}$ ) 3441, 3053, 1632, 1506, 1485, 1459, 1445, 1418, 1351.

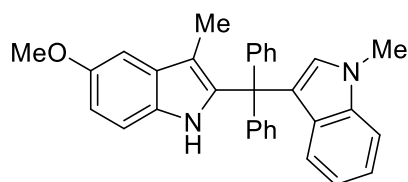

**3b**

### 5-Methoxy-3-methyl-2-((1-methyl-1H-indol-3-yl)diphenylmethyl)-1H-indole

(**3b**) was prepared according to the General Procedure B as a white solid (chromatography eluent: petroleum ether/DCM = 6:1) in 96% yield (135.6 mg).

M.P. 248-250 °C.

$^1\text{H}$  NMR (400 MHz,  $\text{CDCl}_3$ )  $\delta$  7.98 (s, 1H), 7.34-7.27 (m, 11H), 7.20-7.16 (m, 1H), 7.06 (d,  $J = 8.7$  Hz, 1H), 6.96 (d,  $J = 2.3$  Hz, 1H), 6.85-6.81 (m, 1H), 6.79 (dd,  $J_1 = 2.4$  Hz,  $J_2 = 6.3$  Hz, 1H), 6.71 (s, 1H), 6.67 (d,  $J = 8.1$  Hz, 1H), 3.87 (s, 3H), 3.75 (s, 3H), 1.62 (s, 3H) ppm.

$^{13}\text{C}$  NMR (100 MHz,  $\text{CDCl}_3$ )  $\delta$  153.9, 144.5, 139.6, 138.0, 130.6, 130.5, 130.1, 128.9, 128.0, 127.5, 126.6, 122.0, 121.8, 120.5, 119.4, 111.6, 111.3, 109.4, 108.9, 100.0, 56.0, 55.4, 33.0, 10.4 ppm.

HRMS (ES+) Calcd for  $\text{C}_{32}\text{H}_{28}\text{N}_2\text{ONa}$  [ $\text{M} + \text{Na}$ ] $^+$ : 479.2099, Found: 479.2094.

IR  $\nu$  (KBr,  $\text{cm}^{-1}$ ) 3451, 2924, 2852, 2813, 1646, 1597, 1506, 1447, 1382, 1350, 1216.

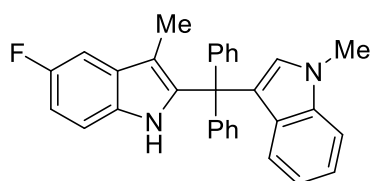

**3c**

**5-Fluoro-3-methyl-2-((1-methyl-1H-indol-3-yl)diphenylmethyl)-1H-indole**

(**3c**) was prepared according to the General Procedure B as a white solid (chromatography eluent: petroleum ether/DCM = 14:1) in 99% yield (139.4 mg).

M.P. 261-262 °C.

$^1\text{H NMR}$  (400 MHz,  $\text{CDCl}_3$ )  $\delta$  8.09 (s, 1H), 7.34-7.29 (m, 11H), 7.21-7.13 (m, 2H), 7.09-7.06 (m, 1H), 6.88-6.80 (m, 2H), 6.70 (s, 1H), 6.66 (d,  $J = 8.1$  Hz, 1H), 3.75 (s, 3H), 1.59 (s, 3H) ppm.

$^{13}\text{C NMR}$  (100 MHz,  $\text{CDCl}_3$ )  $\delta$  157.8 (d,  $J = 232.4$  Hz), 144.3, 140.6, 138.0, 130.7 (d,  $J = 9.1$  Hz), 130.5, 130.2, 130.1, 128.0, 127.5, 126.7, 121.9 (d,  $J = 1.6$  Hz), 120.3, 119.5, 114.1, 111.3, 109.50, 109.45, 109.3, 103.0 (d,  $J = 13.8$  Hz), 55.4, 33.0, 10.3 ppm.

$^{19}\text{F NMR}$  (282 MHz,  $\text{CDCl}_3$ )  $\delta$  -125.2 ppm.

**HRMS** (ES+) Calcd for  $\text{C}_{31}\text{H}_{25}\text{FN}_2\text{Na}$  [ $\text{M} + \text{Na}$ ] $^+$ : 467.1899, Found: 467.1893.

IR  $\nu$  (KBr,  $\text{cm}^{-1}$ ) 3442, 3056, 2926, 1631, 1506, 1483, 1444, 1381, 1350.

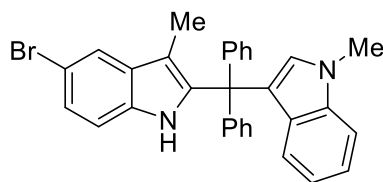

**3d**

**5-Bromo-3-methyl-2-((1-methyl-1H-indol-3-yl)diphenylmethyl)-1H-indole**

**(3d)** was prepared according to the General Procedure B as a white solid (chromatography eluent: petroleum ether/DCM = 14:1) in 91% yield (153.1 mg). M.P. 264-265 °C.

<sup>1</sup>H NMR (400 MHz, CDCl<sub>3</sub>) δ 8.15 (s, 1H), 7.64 (d, *J* = 1.8 Hz, 1H), 7.34-7.27 (m, 11H), 7.21-7.17 (m, 2H), 7.04 (d, *J* = 8.5 Hz, 1H), 6.85-6.81 (m, 1H), 6.69 (s, 1H), 6.64 (d, *J* = 8.1 Hz, 1H), 3.75 (s, 3H), 1.59 (s, 3H) ppm.

<sup>13</sup>C NMR (100 MHz, CDCl<sub>3</sub>) δ 144.2, 140.1, 138.0, 132.3, 132.1, 130.5, 130.0, 128.1, 127.4, 126.8, 123.9, 121.9, 121.8, 120.9, 120.2, 119.5, 112.4, 112.3, 109.5, 109.1, 55.3, 33.0, 10.2 ppm.

HRMS (ES<sup>+</sup>) Calcd for C<sub>31</sub>H<sub>25</sub>BrN<sub>2</sub>Na [M + Na]<sup>+</sup>: 527.1099, Found: 527.1105.

IR ν (KBr, cm<sup>-1</sup>) 3480, 3420, 1613, 1601, 1382, 1350.

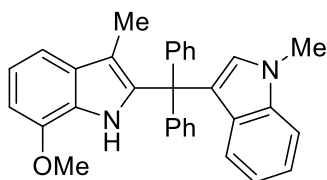

**3e**

**7-Methoxy-3-methyl-2-((1-methyl-1H-indol-3-yl)diphenylmethyl)-1H-indole**

**(3e)** was prepared according to the General Procedure B as a white solid (chromatography eluent: petroleum ether/DCM = 12:1) in 88% yield (120.3 mg).



M.P. 213-214 °C.

<sup>1</sup>H NMR (400 MHz, CDCl<sub>3</sub>) δ 8.24 (s, 1H), 7.33-7.27 (m, 11H), 7.19-7.14 (m, 2H), 7.04 (t, *J* = 15.6 Hz, 1H), 6.83 (t, *J* = 15.0 Hz, 1H), 6.72 (s, 1H), 6.69 (d, *J* = 8.1 Hz, 1H), 6.60 (d, *J* = 7.6 Hz, 1H), 3.85 (s, 3H), 3.74 (s, 3H), 1.63 (s, 3H) ppm.

<sup>13</sup>C NMR (100 MHz, CDCl<sub>3</sub>) δ 145.8, 144.7, 138.2, 138.0, 131.7, 130.4, 130.1, 127.9 (2C), 127.6, 126.6, 124.1, 122.0, 121.6, 120.3, 119.5, 119.3, 111.2, 109.7, 109.3, 101.3, 55.3, 32.9, 10.5 ppm.

HRMS (ES<sup>+</sup>) Calcd for C<sub>32</sub>H<sub>28</sub>N<sub>2</sub>ONa [M + Na]<sup>+</sup>: 479.2099, Found: 479.2090.

IR ν (KBr, cm<sup>-1</sup>) 3451, 2922, 2852, 1631, 1598, 1481, 1447, 1365, 1245, 1215.

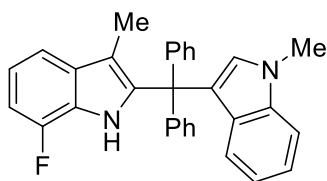

**3f**

### 7-Fluoro-3-methyl-2-((1-methyl-1H-indol-3-yl)diphenylmethyl)-1H-indole

(**3f**) was prepared according to the General Procedure B as a white solid (chromatography eluent: petroleum ether/DCM = 14:1) in 93% yield (128.7 mg).

M.P. 233-234 °C.

<sup>1</sup>H NMR (400 MHz, CDCl<sub>3</sub>) δ 8.24 (s, 1H), 7.34-7.28 (m, 12H), 7.19-7.16 (m, 1H), 7.01-6.98 (m, 1H), 6.86-6.81 (m, 2H), 6.71 (s, 1H), 6.68 (d, *J* = 8.1 Hz, 1H), 3.75 (s, 3H), 1.64 (s, 3H) ppm.

<sup>13</sup>C NMR (100 MHz, CDCl<sub>3</sub>) δ 149.3 (d, *J* = 242.1 Hz), 144.3, 139.5, 138.0, 134.0 (d, *J* = 5.4 Hz), 130.4, 130.1, 128.1, 127.4, 126.8, 122.0, 121.9, 121.8, 120.1, 119.5,

119.2 (d,  $J = 6.3$  Hz), 114.1 (d,  $J = 3.2$  Hz), 110.2, 109.5, 106.2 (d,  $J = 16.2$  Hz), 55.3, 33.0, 10.5 ppm.

$^{19}\text{F}$  NMR (282 MHz,  $\text{CDCl}_3$ )  $\delta$  -135.8 ppm.

HRMS (ES+) Calcd for  $\text{C}_{31}\text{H}_{25}\text{FN}_2\text{Na}$  [ $\text{M} + \text{Na}$ ] $^+$ : 467.1899, Found: 467.1893.

IR  $\nu$  (KBr,  $\text{cm}^{-1}$ ) 3452, 3055, 2923, 2851, 1631, 1536, 1445, 1384, 1350, 1327, 1255.

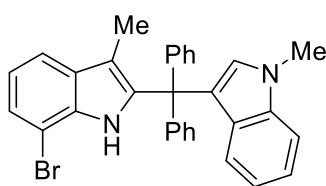

**3g**

### 7-Bromo-3-methyl-2-((1-methyl-1H-indol-3-yl)diphenylmethyl)-1H-indole

(**3g**) was prepared according to the General Procedure B as a white solid (chromatography eluent: petroleum ether/DCM = 14:1) in 97% yield (149.8 mg).

M.P. 226-228 °C.

$^1\text{H}$  NMR (400 MHz,  $\text{CDCl}_3$ )  $\delta$  8.36 (s, 1H), 7.45 (d,  $J = 7.9$  Hz, 1H), 7.34-7.30 (m, 11H), 7.25-7.17 (m, 2H), 6.97 (t,  $J = 7.7$  Hz, 1H), 6.88-6.85 (m, 1H), 6.73 (d,  $J = 8.0$  Hz, 1H), 6.68 (s, 1H), 3.75 (s, 3H), 1.62 (s, 3H) ppm.

$^{13}\text{C}$  NMR (100 MHz,  $\text{CDCl}_3$ )  $\delta$  144.2, 139.4, 138.0, 132.5, 131.3, 130.5, 130.0, 128.1 (2C), 127.4, 126.8, 123.5, 121.9, 121.8, 120.2, 119.5, 117.5, 110.5, 109.5, 104.4, 55.4, 33.0, 10.5 ppm.

HRMS (ES+) Calcd for  $\text{C}_{31}\text{H}_{25}\text{BrN}_2\text{Na}$  [ $\text{M} + \text{Na}$ ] $^+$ : 527.1099, Found: 527.1104.

IR  $\nu$  (KBr,  $\text{cm}^{-1}$ ) 3431, 163, 158, 1382, 1350, 1150.

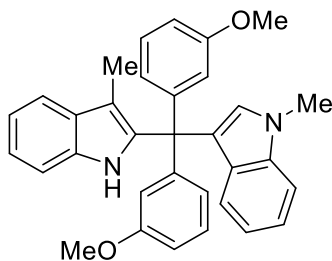

**3h**

**2-(Bis(3-methoxyphenyl)(1-methyl-1H-indol-3-yl)methyl)-3-methyl-1H-**

**indole (3h)** was prepared according to the General Procedure B as a white solid (chromatography eluent: petroleum ether/DCM = 7:2) in 67% yield (98.2 mg).

M.P. 277-278 °C.

$^1\text{H NMR}$  (400 MHz,  $\text{CDCl}_3$ )  $\delta$  8.12(s, 1H), 7.54-7.52 (m, 1H), 7.31 (d,  $J = 4.1$  Hz, 1H), 7.22-7.08 (m, 6H), 6.94-6.80 (m, 7H), 6.75-6.74 (m, 2H), 3.74 (s, 3H), 3.68 (s, 6H), 1.71 (s, 3H) ppm.

$^{13}\text{C NMR}$  (100 MHz,  $\text{CDCl}_3$ )  $\delta$  159.4, 146.2, 138.3, 138.0, 133.7, 130.5, 130.3, 128.7, 127.6, 123.0, 122.0, 121.7, 121.2, 120.1, 119.4, 118.9, 118.3, 116.6, 111.3, 110.8, 109.4, 109.2, 55.34, 55.25, 32.9, 10.4 ppm.

**HRMS** (ES+) Calcd for  $\text{C}_{33}\text{H}_{30}\text{N}_2\text{O}_2\text{Na}$   $[\text{M} + \text{Na}]^+$ : 509.2205, Found: 509.2209.

**IR**  $\nu$  (KBr,  $\text{cm}^{-1}$ ) 3444, 3368, 1631, 1601, 1484, 1461, 1426, 1350, 1286, 1246, 1187, 1048.

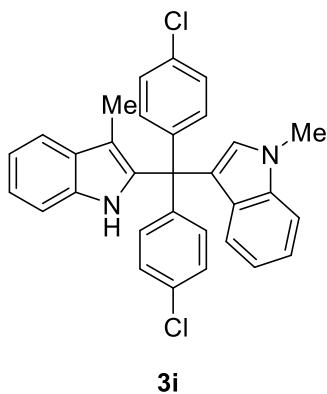

**2-(Bis(4-chlorophenyl)(1-methyl-1H-indol-3-yl)methyl)-3-methyl-1H-indole**

**(3i)** was prepared according to the General Procedure B as a white solid (chromatography eluent: petroleum ether/DCM = 16:1) in 59% yield (87.9 mg).

M.P. 243-245 °C.

<sup>1</sup>H NMR (400 MHz, CDCl<sub>3</sub>) δ 8.04(s, 1H), 7.53-7.50 (m, 1H), 7.33 (d, *J* = 8.2 Hz, 1H), 7.25-7.18 (m, 9H), 7.16-7.08 (m, 3H), 6.85 (t, *J* = 7.6 Hz, 1H), 6.66 (d, *J* = 8.0 Hz, 1H), 6.62 (s, 1H), 3.73 (s, 3H), 1.64 (s, 3H) ppm.

<sup>13</sup>C NMR (100 MHz, CDCl<sub>3</sub>) δ 142.6, 138.1, 137.7, 133.8, 132.7, 131.3, 130.4, 130.1, 128.2, 126.9, 122.1, 121.7, 121.6, 119.84, 119.81, 119.3, 118.4, 110.9, 109.7, 109.2, 54.5, 33.0, 10.5 ppm.

HRMS (ES<sup>+</sup>) Calcd for C<sub>31</sub>H<sub>24</sub>Cl<sub>2</sub>N<sub>2</sub>Na [M+ Na]<sup>+</sup>: 517.1214, Found: 517.1216.

IR ν (KBr, cm<sup>-1</sup>) 3442, 1631, 1488, 1448, 1350, 1152, 1031.

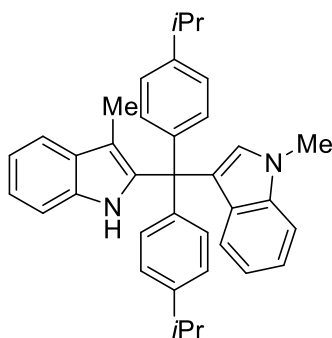

**3j**

**2-(Bis(4-isopropylphenyl)(1-methyl-1H-indol-3-yl)methyl)-3-methyl-1H-indole (3j)** was prepared according to the General Procedure B as a white solid (chromatography eluent: petroleum ether/DCM = 20:1) in 68% yield (104.2 mg). M.P. 222-223 °C.

<sup>1</sup>H NMR (400 MHz, CDCl<sub>3</sub>) δ 8.01 (s, 1H), 7.54-7.52 (m, 1H), 7.33 (d, *J* = 8.2 Hz, 1H), 7.23-7.10 (m, 12H), 6.83 (t, *J* = 7.3 Hz, 1H), 6.74 (s, 1H), 6.69 (d, *J* = 8.1 Hz, 1H), 3.75 (s, 3H), 2.96-2.89 (m, 2H), 1.65 (s, 3H), 1.28 (d, *J* = 6.9 Hz, 12H) ppm.

<sup>13</sup>C NMR (100 MHz, CDCl<sub>3</sub>) δ 146.9, 142.1, 139.1, 138.0, 133.7, 130.45, 130.36, 130.0, 127.8, 125.9, 122.2, 121.6, 121.0, 120.8, 119.2, 118.9, 118.2, 110.7, 109.3, 109.0, 54.6, 33.6, 32.9, 24.1, 10.3 ppm.

HRMS (ES<sup>+</sup>) Calcd for C<sub>37</sub>H<sub>38</sub>N<sub>2</sub>Na [M + Na]<sup>+</sup>: 533.2932, Found: 533.2933.

IR ν (KBr, cm<sup>-1</sup>) 3451, 2959, 2924, 1631, 1599, 1459, 1418, 1350.

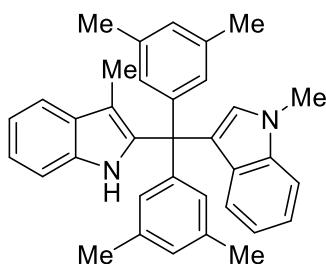

**3k**

**2-(Bis(3,5-dimethylphenyl)(1-methyl-1*H*-indol-3-yl)methyl)-3-methyl-1*H*-indole (3k)** was prepared according to the General Procedure B as a white solid (chromatography eluent: petroleum ether/DCM = 16:1) in 73% yield (105.7 mg). M.P. 251-252 °C.

<sup>1</sup>H NMR (400 MHz, CDCl<sub>3</sub>) δ 8.11 (s, 1H), 7.56-7.53 (m, 1H), 7.32 (d, *J* = 8.2 Hz, 1H), 7.22-7.10 (m, 4H), 6.92 (s, 6H), 6.82 (t, *J* = 7.6 Hz, 1H), 6.71 (d, *J* = 7.5 Hz, 2H), 3.76 (s, 3H), 2.24 (s, 12H), 1.66 (s, 3H) ppm.

<sup>13</sup>C NMR (100 MHz, CDCl<sub>3</sub>) δ 144.5, 138.8, 137.9, 137.0, 133.6, 130.4, 130.3, 128.1, 128.0, 127.8, 122.2, 121.5, 120.9, 120.8 (2C), 119.2, 118.8, 118.3, 110.7, 109.2, 55.1, 33.0, 21.8, 10.4 ppm.

HRMS (ES<sup>+</sup>) Calcd for C<sub>35</sub>H<sub>34</sub>N<sub>2</sub>Na [M + Na]<sup>+</sup>: 505.2620, Found: 505.2626.

IR ν (KBr, cm<sup>-1</sup>) 3447, 2915, 1631, 1596, 1458, 1408, 1350.

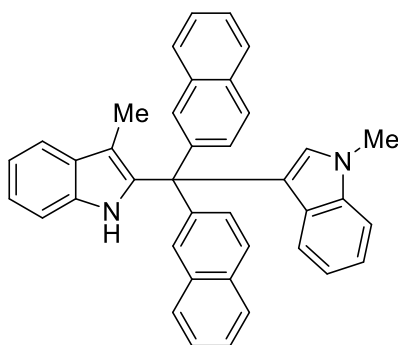

**3l**

**1-Methyl-3-((3-methyl-1*H*-indol-2-yl)di(naphthalen-2-yl)methyl)-1*H*-indole (3l)** was prepared according to the General Procedure B as a white solid (chromatography eluent: petroleum ether/DCM = 16:1) in 35% yield (55.5 mg). M.P. 278-279 °C.

$^1\text{H NMR}$  (400 MHz,  $\text{CDCl}_3$ )  $\delta$  8.25 (s, 1H), 7.88 (s, 2H), 7.86 (d,  $J = 7.9$  Hz, 2H), 7.74 (t,  $J = 9.0$  Hz, 4H), 7.60-7.58 (m, 1H), 7.52-7.42 (m, 6H), 7.35 (d,  $J = 8.6$  Hz, 1H), 7.23-7.13 (m, 4H), 6.79-6.75 (m, 3H), 3.76 (s, 3H), 1.71 (s, 3H) ppm.

$^{13}\text{C NMR}$  (100 MHz,  $\text{CDCl}_3$ )  $\delta$  141.8, 138.1, 138.0, 133.9, 133.2, 132.3, 130.5, 130.4, 129.3, 128.7, 128.0, 127.5, 127.4, 127.3, 126.1, 126.0, 121.9, 121.8, 121.3, 120.0, 119.6, 119.1, 118.4, 110.9, 109.7, 109.5, 55.5, 33.0, 10.3 ppm.

**HRMS** (ES+) Calcd for  $\text{C}_{39}\text{H}_{30}\text{N}_2\text{Na}$  [ $\text{M} + \text{Na}$ ] $^+$ : 549.2307, Found: 549.2305

**IR**  $\nu$  (KBr,  $\text{cm}^{-1}$ ) 3442, 1631, 1599, 1457, 1418, 1381, 1350.

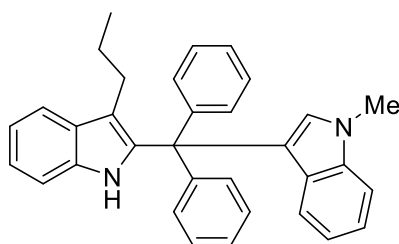

**3m**

**3-(Diphenyl(3-propyl-1H-indol-2-yl)methyl)-1-methyl-1H-indole (3m)** was prepared according to the General Procedure B as a white solid (chromatography eluent: petroleum ether/DCM = 15:1) in 64% yield (87.2 mg).

M.P. 202-203 °C.

$^1\text{H NMR}$  (400 MHz,  $\text{CDCl}_3$ )  $\delta$  8.12 (s, 1H), 7.61 (d,  $J = 6.5$  Hz, 1H), 7.37-7.29 (m, 11H), 7.20-7.13 (m, 4H), 6.85-6.81 (m, 2H), 6.74 (d,  $J = 7.9$  Hz, 1H), 3.78 (s, 3H), 2.28 (t,  $J = 7.8$  Hz, 2H), 0.93-0.89 (m, 2H), 0.55 (t,  $J = 6.9$  Hz, 3H) ppm.

$^{13}\text{C NMR}$  (100 MHz,  $\text{CDCl}_3$ )  $\delta$  144.6, 138.0, 137.9, 134.0, 130.4, 130.3, 129.8, 127.8, 127.5, 126.6, 122.0, 121.8, 121.1, 120.6, 119.4, 119.2, 119.0, 114.1, 110.9, 109.4, 55.4,

32.9, 29.0, 21.8, 14.9 ppm.

**HRMS** (ES+) Calcd for C<sub>33</sub>H<sub>31</sub>N<sub>2</sub> [M+H]<sup>+</sup>: 455.2487, Found: 455.2479.

**IR**  $\nu$  (KBr, cm<sup>-1</sup>) 3443, 2960, 2911, 1637, 1588, 1431, 1453, 1411, 1350, 1201.

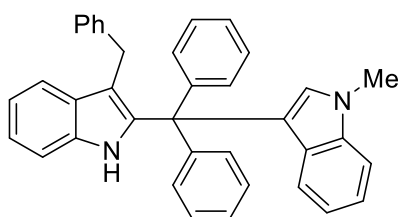

**3n**

**3-Benzyl-2-((1-methyl-1H-indol-3-yl)diphenylmethyl)-1H-indole (3n)** was prepared according to the General Procedure B as a white solid (chromatography eluent: petroleum ether/DCM = 15:1) in 98% yield (148.9 mg). M.P. 225-226 °C.

**<sup>1</sup>H NMR** (400 MHz, CDCl<sub>3</sub>)  $\delta$  8.26 (s, 1H), 7.40-7.38 (m, 4H), 7.26-7.24 (m, 9H), 7.19-7.12 (m, 2H), 7.06-6.99 (m, 4H), 6.85 (t, *J* = 7.7 Hz, 1H), 6.77 (d, *J* = 9.7 Hz, 2H), 6.70 (d, *J* = 6.4 Hz, 2H), 3.71 (s, 2H), 3.62 (s, 3H) ppm.

**<sup>13</sup>C NMR** (100 MHz, CDCl<sub>3</sub>)  $\delta$  144.4, 140.6, 139.5, 137.9, 133.9, 130.4, 130.18, 130.15, 128.4, 128.0, 127.63, 127.58, 126.6, 125.1, 121.9, 121.7, 121.3, 120.1, 119.8, 119.34, 119.29, 111.3, 110.9, 109.5, 55.5, 32.8, 31.8 ppm.

**HRMS** (ES+) Calcd for C<sub>37</sub>H<sub>31</sub>N<sub>2</sub> [M+H]<sup>+</sup>: 503.2487, Found: 503.2486.

**IR**  $\nu$  (KBr, cm<sup>-1</sup>) 3451, 2903, 1611, 1574, 1457, 1421, 1409, 1297, 1203.



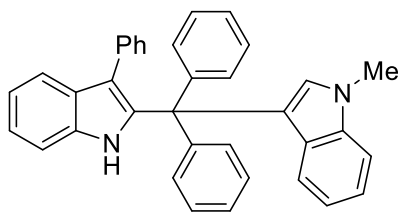

**3o**

**3-(Diphenyl(3-phenyl-1H-indol-2-yl)methyl)-1-methyl-1H-indole (3o)** was prepared according to the General Procedure B as a white solid (chromatography eluent: petroleum ether/DCM = 10:1) in 95% yield (138.8 mg). M.P. 239-241 °C.

<sup>1</sup>H NMR (400 MHz, CDCl<sub>3</sub>) δ 8.42 (s, 1H), 7.35-7.28 (m, 6H), 7.23-7.13 (m, 9H), 7.08 (t, *J* = 7.2 Hz, 1H), 6.94 (t, *J* = 6.3 Hz, 1H), 6.87-6.78 (m, 4H), 6.70 (d, *J* = 6.7 Hz, 2H), 6.57 (s, 1H), 3.56 (s, 3H) ppm.

<sup>13</sup>C NMR (100 MHz, CDCl<sub>3</sub>) δ 145.3, 137.8, 137.4, 135.3, 133.9, 131.2, 130.5, 130.3, 128.2, 127.8 (2C), 126.7, 126.5, 124.9, 122.0, 121.9, 121.5, 119.74, 119.70, 119.4, 119.3, 116.4, 110.7, 109.2, 55.9, 32.6 ppm.

HRMS (ES<sup>+</sup>) Calcd for C<sub>36</sub>H<sub>29</sub>N<sub>2</sub> [M + H]<sup>+</sup>: 489.2331, Found: 489.2239.

IR ν (KBr, cm<sup>-1</sup>) 3438, 2913, 1703, 1619, 1433, 1416, 1398, 1292, 1197.

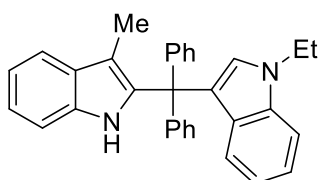

**4a**

**1-Ethyl-3-((3-methyl-1H-indol-2-yl)diphenylmethyl)-1H-indole (4a)** was prepared according to the General Procedure B as a white solid (chromatography eluent: petroleum ether/DCM = 14:1) in 90% yield (118.4 mg).

M.P. 231-233 °C.

$^1\text{H NMR}$  (400 MHz,  $\text{CDCl}_3$ )  $\delta$  8.12 (s, 1H), 7.56-7.53 (m, 1H), 7.28-7.29 (m, 11H), 7.21-7.12 (m, 4H), 6.85 (t,  $J = 7.7$  Hz, 1H), 6.79 (s, 1H), 6.70 (d,  $J = 8.0$  Hz, 1H), 4.14 (dd,  $J_1 = 7.2$  Hz,  $J_2 = 14.4$  Hz, 2H), 1.66 (s, 3H), 1.44 (t,  $J = 7.2$  Hz, 3H) ppm.

$^{13}\text{C NMR}$  (100 MHz,  $\text{CDCl}_3$ )  $\delta$  144.5, 138.8, 137.0, 133.7, 130.3, 130.1, 129.0, 127.9, 127.7, 126.6, 122.1, 121.6, 121.2, 120.5, 119.3, 119.0, 118.3, 110.8, 109.5, 109.2, 55.4, 41.1, 15.7, 10.2 ppm.

**HRMS** (ES+) Calcd for  $\text{C}_{32}\text{H}_{28}\text{N}_2\text{Na}$  [ $\text{M} + \text{Na}$ ] $^+$ : 463.2150, Found: 463.2155.

**IR**  $\nu$  (KBr,  $\text{cm}^{-1}$ ) 3449, 3052, 2982, 2929, 2809, 1631, 1566, 1489, 1484, 1472, 1457, 1444, 1418 138, 1350.

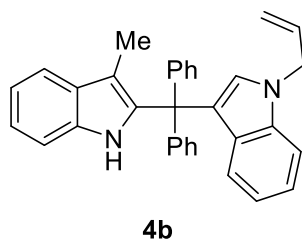

**1-Allyl-3-((3-methyl-1H-indol-2-yl)diphenylmethyl)-1H-indole (4b)** was prepared according to the General Procedure B as a white solid (chromatography eluent: petroleum ether/DCM = 12:1) in 80% yield (108.6 mg).

M.P. 241-242 °C.

$^1\text{H NMR}$  (400 MHz,  $\text{CDCl}_3$ )  $\delta$  8.11 (s, 1H), 7.56-7.54 (m, 1H), 7.36-7.29 (m, 11H), 7.22-7.11 (m, 4H), 6.87-6.82 (m, 1H), 6.79 (s, 1H), 6.71 (d,  $J = 8.1$  Hz, 1H), 6.03-5.94 (m, 1H), 5.19 (d,  $J = 10.2$  Hz, 1H), 5.05 (d,  $J = 17.0$  Hz, 1H), 4.70 (d,  $J = 4.7$  Hz, 2H), 1.67 (s, 3H) ppm.

$^{13}\text{C}$  NMR (100 MHz,  $\text{CDCl}_3$ )  $\delta$  144.5, 138.6, 137.4, 133.7, 133.5, 130.3, 130.1, 129.7, 128.0, 127.8, 126.6, 122.1, 121.8, 121.2, 120.8, 119.5, 119.1, 118.3, 117.1, 110.8, 109.9, 109.2, 55.3, 48.9, 10.3 ppm.

HRMS (ES+) Calcd for  $\text{C}_{33}\text{H}_{28}\text{N}_2\text{Na}$   $[\text{M} + \text{Na}]^+$ : 475.2150, Found: 475.2146.

IR  $\nu$  (KBr,  $\text{cm}^{-1}$ ) 3445, 1631, 1602, 1472, 1382, 1350.

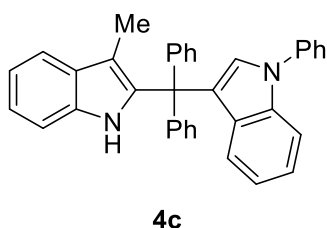

**2-(Diphenyl(1-phenyl-1H-indol-3-yl)methyl)-3-methyl-1H-indole (4c)** was prepared according to the General Procedure B as a white solid (chromatography eluent: petroleum ether/DCM = 24:1) in 65% yield (94.6 mg). M.P. 256-257 °C.

$^1\text{H}$  NMR (400 MHz,  $\text{CDCl}_3$ )  $\delta$  8.12 (s, 1H), 7.59-7.49 (m, 6H), 7.38-7.28 (m, 11H), 7.24-7.10 (m, 4H), 7.05 (s, 1H), 6.89 (t,  $J = 7.7$  Hz, 1H), 6.76 (d,  $J = 8.0$  Hz, 1H), 1.70 (s, 3H) ppm.

$^{13}\text{C}$  NMR (100 MHz,  $\text{CDCl}_3$ )  $\delta$  144.3, 139.6, 138.3, 137.2, 133.8, 130.3, 130.2, 129.7, 129.6, 128.5, 128.1, 126.8, 126.7, 124.6, 122.9, 122.6, 122.3, 121.3, 120.4, 119.1, 118.3, 110.8, 110.7, 109.4, 55.4, 10.3 ppm.

HRMS (ES+) Calcd for  $\text{C}_{36}\text{H}_{28}\text{N}_2\text{Na}$   $[\text{M} + \text{Na}]^+$ : 511.2150, Found: 511.2152.

IR  $\nu$  (KBr,  $\text{cm}^{-1}$ ) 3448, 3089, 1506, 1499, 1457, 1457, 1418, 1235, 1156.

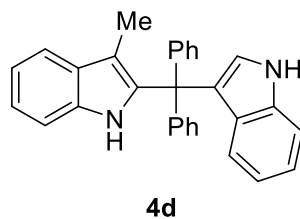

**2-((1H-indol-3-yl)diphenylmethyl)-3-methyl-1H-indole (4d)** was prepared according to the General Procedure B as a white solid (chromatography eluent: petroleum ether/DCM = 8:1) in 52% yield (64.2 mg).

M.P. 253-254 °C.

<sup>1</sup>H NMR (400 MHz, CDCl<sub>3</sub>) δ 8.05 (s, 1H), 7.96 (s, 1H), 7.52-7.50 (m, 1H), 7.35-7.23 (m, 11H), 7.14-7.08 (m, 4H), 6.82-6.79 (m, 2H), 6.67 (d, *J* = 8.0 Hz, 1H), 1.62 (s, 3H) ppm.

<sup>13</sup>C NMR (100 MHz, CDCl<sub>3</sub>) δ 144.4, 138.5, 137.2, 133.8, 130.3, 130.1, 128.0, 127.2, 126.7, 125.9, 122.25, 122.17, 121.9, 121.3, 119.9, 119.1, 118.3, 111.4, 110.8, 109.3, 55.3, 10.3 ppm.

HRMS (ES<sup>+</sup>) Calcd for C<sub>30</sub>H<sub>24</sub>N<sub>2</sub>Na [M + Na]<sup>+</sup>: 435.1837, Found: 435.1827.

IR ν (KBr, cm<sup>-1</sup>) 3442, 3365, 3055, 1613, 1597, 1457, 1418, 1350.

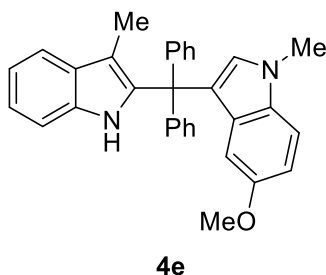

**5-Methoxy-1-methyl-3-((3-methyl-1H-indol-2-yl)diphenylmethyl)-1H-indole (4e)** was prepared according to the General Procedure B as a white solid (chromatography eluent: petroleum ether/DCM = 8:1) in 93% yield (127.2 mg).

M.P. 239-241 °C.

<sup>1</sup>H NMR (400 MHz, CDCl<sub>3</sub>) δ 8.12 (s, 1H), 7.55-7.53 (m, 1H), 7.32-7.28 (m, 10H), 7.21-7.11 (m, 4H), 6.83 (dd, *J*<sub>1</sub> = 1.8 Hz, *J*<sub>2</sub> = 7.0 Hz, 1H), 6.70 (s, 1H), 6.00 (s, 1H), 3.72 (s, 3H), 3.31 (s, 3H), 1.66 (s, 3H) ppm.

<sup>13</sup>C NMR (100 MHz, CDCl<sub>3</sub>) δ 153.6, 144.4, 138.8, 133.7, 133.3, 130.9, 130.3, 130.2, 128.0, 127.7, 126.6, 121.2, 120.1, 119.1, 118.2, 112.4, 110.8, 110.2, 109.2, 103.0, 55.4, 55.3, 33.1, 10.3 ppm.

HRMS (ES<sup>+</sup>) Calcd for C<sub>32</sub>H<sub>28</sub>N<sub>2</sub>ONa [M + Na]<sup>+</sup>: 479.2099, Found: 479.2090.

IR ν (KBr, cm<sup>-1</sup>) 3451, 3377, 3054, 3018, 2938, 1631, 1588, 1490, 1444, 1424, 1380, 1224.

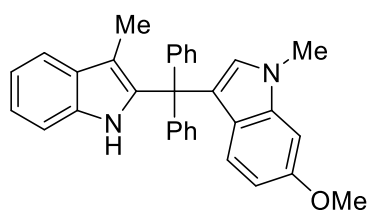

**4f**

**6-Methoxy-1-methyl-3-((3-methyl-1H-indol-2-yl)diphenylmethyl)-1H-indole**

(**4f**) was prepared according to the General Procedure B as a white solid (chromatography eluent: petroleum ether/DCM = 12:1) in 76% yield (104.1 mg).

M.P. 259-260 °C.

<sup>1</sup>H NMR (400 MHz, CDCl<sub>3</sub>) δ 8.10 (s, 1H), 7.51 (s, 1H), 7.27-7.10 (m, 13H), 6.74 (s, 1H), 6.56-6.48 (m, 3H), 3.83 (s, 3H), 3.02 (s, 3H), 1.63 (s, 3H) ppm.

<sup>13</sup>C NMR (100 MHz, CDCl<sub>3</sub>) δ 156.2, 144.4, 138.7, 138.6, 133.6, 130.2, 130.0, 128.1, 129.4, 127.8, 126.5, 122.6, 121.8, 121.1, 120.5, 119.0, 110.7, 109.2, 109.1, 92.7, 55.6,

55.2, 32.9, 10.2 ppm.

**HRMS** (ES+) Calcd for C<sub>32</sub>H<sub>28</sub>N<sub>2</sub>ONa [M + Na]<sup>+</sup>: 479.2099, Found: 479.2095.

**IR**  $\nu$  (KBr, cm<sup>-1</sup>) 3442, 3068, 2931, 1688, 1490, 1458, 1420, 1418, 1332, 1254, 1227, 1205, 1172, 1119, 1108, 1034.

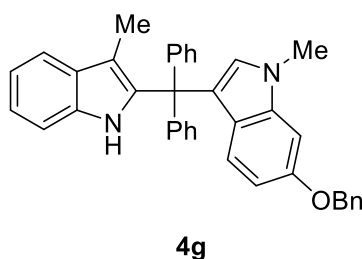

**6-(Benzyloxy)-1-methyl-3-((3-methyl-1H-indol-2-yl)diphenylmethyl)-1H-**

**indole (4g)** was prepared according to the General Procedure B as a white solid (chromatography eluent: petroleum ether/DCM = 8:1) in 84% yield (134.2 mg).

M.P. 226-227 °C.

<sup>1</sup>H NMR (400 MHz, CDCl<sub>3</sub>)  $\delta$  8.13 (s, 1H), 7.55-7.53 (m, 1H), 7.48 (d, *J* = 7.2 Hz, 2H), 7.41 (t, *J* = 7.1 Hz, 2H), 7.37-7.28 (m, 11H), 7.20-7.18 (m, 1H), 7.15-7.10 (m, 2H), 6.86 (d, *J* = 1.6 Hz, 1H), 6.61-6.58 (m, 2H), 6.55 (d, *J* = 8.8 Hz, 1H), 5.10 (s, 2H), 3.68 (s, 3H), 1.66 (s, 3H) ppm.

<sup>13</sup>C NMR (100 MHz, CDCl<sub>3</sub>)  $\delta$  155.5, 144.5, 138.72, 138.70, 137.4, 133.7, 130.3, 130.1, 129.7, 128.7, 128.1, 127.9, 127.7, 126.6, 122.7, 122.1, 121.2, 120.6, 119.0, 118.3, 110.8, 109.7, 109.2, 94.1, 70.6, 55.2, 33.0, 10.3 ppm.

**HRMS** (ES+) Calcd for C<sub>38</sub>H<sub>32</sub>N<sub>2</sub>ONa [M + Na]<sup>+</sup>: 555.2412, Found: 555.2411.

**IR**  $\nu$  (KBr, cm<sup>-1</sup>) 3441, 1631, 1588, 1489, 1472, 1382, 1350, 1332.

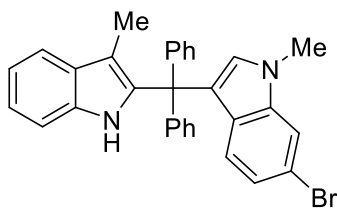

4h

**6-Bromo-1-methyl-3-((3-methyl-1H-indol-2-yl)diphenylmethyl)-1H-indole**

(4h) was prepared according to the General Procedure B as a white solid (chromatography eluent: petroleum ether/DCM = 24:1) in 64% yield (97.1 mg).

M.P. 276-277 °C.

<sup>1</sup>H NMR (400 MHz, CDCl<sub>3</sub>) δ 7.97 (s, 1H), 7.54-7.49 (m, 2H), 7.29 (s, 10H), 7.21-7.12 (m, 3H), 6.92 (d, *J* = 8.5 Hz, 1H), 6.71 (s, 1H), 6.50 (d, *J* = 8.6 Hz, 1H), 3.17 (s, 3H), 1.64 (s, 3H) ppm.

<sup>13</sup>C NMR (100 MHz, CDCl<sub>3</sub>) δ 144.3, 138.8, 138.2, 133.7, 131.0, 130.3, 130.1, 128.1, 126.8, 126.5, 123.2, 122.7, 121.4, 120.8, 119.2, 118.3, 115.6, 112.6, 110.8, 109.4, 55.1, 33.1, 10.3 ppm.

HRMS (ES<sup>+</sup>) Calcd for C<sub>31</sub>H<sub>25</sub>BrN<sub>2</sub>Na [M + Na]<sup>+</sup>: 527.1099, Found: 527.1097.

IR ν (KBr, cm<sup>-1</sup>) 3450, 2811, 1632, 1578, 1445, 1418, 1382, 1350.

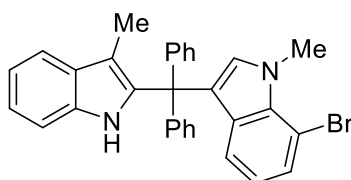

4i

**7-Bromo-1-methyl-3-((3-methyl-1H-indol-2-yl)diphenylmethyl)-1H-indole**

(4i) was prepared according to the General Procedure B as a white solid (chromatography eluent: petroleum ether/DCM = 30:1) in 56% yield (84.9 mg).

M.P. 273-274 °C.

$^1\text{H NMR}$  (400 MHz,  $\text{CDCl}_3$ )  $\delta$  8.00 (s, 1H), 7.55-7.53 (m, 1H), 7.34-7.29 (m, 11H), 7.22-7.12 (m, 3H), 6.68 (s, 1H), 6.61-6.60 (m, 2H), 4.12 (s, 3H), 1.65 (s, 3H) ppm.

$^{13}\text{C NMR}$  (100 MHz,  $\text{CDCl}_3$ )  $\delta$  144.2, 138.1, 134.3, 133.7, 133.6, 130.6, 130.3, 130.1, 128.1, 126.9, 121.5, 121.4, 120.5, 120.1, 119.2, 118.3, 110.8, 109.4, 55.1, 104.0, 55.2, 37.2, 10.3 ppm.

**HRMS** (ES+) Calcd for  $\text{C}_{31}\text{H}_{25}\text{BrN}_2\text{Na}$   $[\text{M} + \text{Na}]^+$ : 527.1099, Found: 527.1100.

**IR**  $\nu$  (KBr,  $\text{cm}^{-1}$ ) 3451, 1631, 1489, 1457, 1418, 1381, 1350.

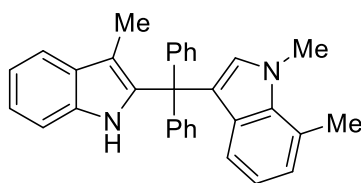

**4j**

**1,7-Dimethyl-3-((3-methyl-1H-indol-2-yl)diphenylmethyl)-1H-indole (4j)**

was prepared according to the General Procedure B as a white solid (chromatography eluent: petroleum ether/DCM = 16:1) in 95% yield (132.0 mg).

M.P. 231-232 °C.

$^1\text{H NMR}$  (400 MHz,  $\text{CDCl}_3$ )  $\delta$  8.13 (s, 1H), 7.55-7.53 (m, 1H), 7.30-7.28 (m, 10H), 7.19-7.11 (m, 3H), 6.87 (d,  $J = 6.9$  Hz, 1H), 6.68 (t,  $J = 7.7$  Hz, 1H), 6.59 (s, 1H), 6.53 (d,  $J = 8.0$  Hz, 1H), 4.01 (s, 3H), 2.80 (s, 3H), 1.66 (s, 3H) ppm.

$^{13}\text{C NMR}$  (100 MHz,  $\text{CDCl}_3$ )  $\delta$  144.4, 138.8, 136.8, 133.7, 132.4, 130.3, 130.1, 128.5, 127.9, 126.6, 124.5, 121.3, 121.2, 120.2, 120.0, 119.6, 119.0, 118.2, 110.8, 109.1, 55.3, 37.1, 20.0, 10.3 ppm.



HRMS (ES+) Calcd for C<sub>32</sub>H<sub>28</sub>N<sub>2</sub>Na [M + Na]<sup>+</sup>: 463.2150, Found: 463.2157.

IR  $\nu$  (KBr, cm<sup>-1</sup>) 3450, 1630, 1620, 1489, 1459, 1407, 1418, 1380, 1350.

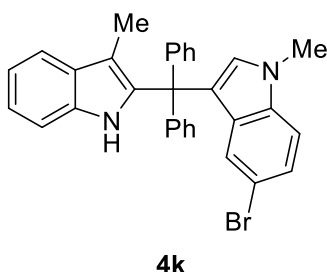

**5-Bromo-1-methyl-3-((3-methyl-1H-indol-2-yl)diphenylmethyl)-1H-indole**

(**4k**) was prepared according to the General Procedure B as a white solid (chromatography eluent: petroleum ether/DCM =12:1) in 75% yield (114.4 mg).

M.P. 244-246 °C.

<sup>1</sup>H NMR (400 MHz, CDCl<sub>3</sub>)  $\delta$  7.97 (s, 1H), 7.55-7.53 (m, 1H), 7.30-7.29 (m, 10H), 7.24-7.16 (m, 3H), 7.15-7.10 (m, 2H), 6.75 (s, 1H), 6.73 (d, *J* = 1.7 Hz, 1H), 3.72 (s, 3H), 1.65 (s, 3H) ppm.

<sup>13</sup>C NMR (100 MHz, CDCl<sub>3</sub>)  $\delta$  144.1, 138.4, 136.6, 133.7, 131.6, 130.3, 130.1, 129.2, 128.1, 126.8, 124.8, 124.3, 121.4, 120.1, 119.2, 118.3, 112.8, 111.0, 110.9, 109.2, 55.1, 33.1, 10.3 ppm.

HRMS (ES+) Calcd for C<sub>31</sub>H<sub>25</sub>BrN<sub>2</sub>Na [M + Na]<sup>+</sup>: 527.1099, Found: 527.1096.

IR  $\nu$  (KBr, cm<sup>-1</sup>) 3453, 3055, 1631, 1589, 1474, 1418, 1382, 1350.

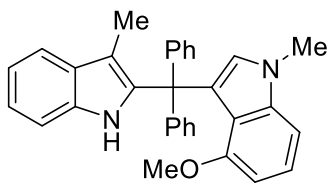

**4I**

**4-Methoxy-1-methyl-3-((3-methyl-1H-indol-2-yl)diphenylmethyl)-1H-indole**

**(4I)** was prepared according to the General Procedure B as a white solid (chromatography eluent: petroleum ether/EtOAc = 100:1) in 76% yield (103.8 mg).

M.P. 235-236 °C.

<sup>1</sup>H NMR (400 MHz, CDCl<sub>3</sub>) δ 8.07 (s, 1H), 7.50-7.48 (m, 1H), 7.24-7.12 (m, 12H), 7.10-7.05 (m, 2H), 6.93 (d, *J* = 8.2 Hz, 1H), 6.45 (s, 1H), 6.30 (d, *J* = 7.8 Hz, 1H), 3.66 (s, 3H), 2.95 (s, 3H), 1.61 (s, 3H) ppm.

<sup>13</sup>C NMR (100 MHz, CDCl<sub>3</sub>) δ 158.3, 145.9, 139.9, 133.7, 130.3, 130.2, 130.1, 130.0, 127.3 (2C), 125.9, 122.9, 120.7, 118.6, 118.0, 117.9, 110.5, 108.5, 102.4, 100.4, 56.0, 54.3, 33.1, 10.4 ppm.

**HRMS** (ES<sup>+</sup>) Calcd for C<sub>32</sub>H<sub>28</sub>N<sub>2</sub>O [M + Na]<sup>+</sup>: 527.1099, Found: 527.1096.

**IR** ν (KBr, cm<sup>-1</sup>) 3461, 2962, 2812, 1631, 1588, 1498, 1458, 1382, 1350, 1262, 1094, 1026.

### General Procedure C for the Synthesis of Tetraarylmethanes 5.

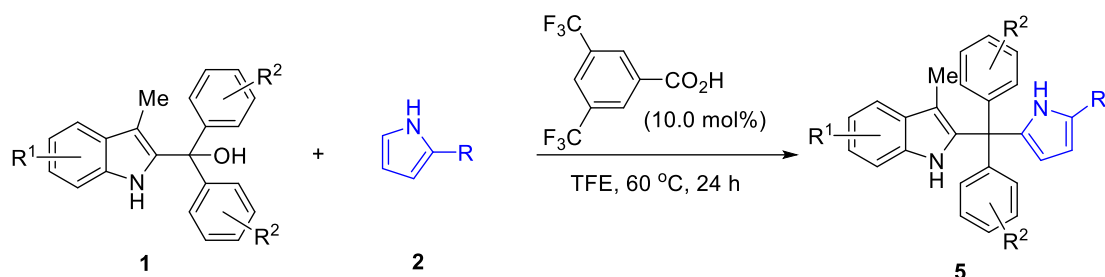

To a solution of indol-2-yl methanols **1** (0.3 mmol, 1.0 equiv), pyrroles **2** (0.6 mmol, 2.0 equiv) in  $\text{CF}_3\text{CH}_2\text{OH}$  (3.0 mL) was added 3,5-bis(trifluoromethyl)benzoic acid (7.7 mg, 0.03 mmol, 10.0 mol%). The reaction mixture was warmed up to 60 °C and kept stirring for 24 h. The reaction mixture was directly concentrated under reduced pressure. The residue was purified by silica gel column chromatography (eluent: petroleum ether/DCM) to afford the desired products **5**.

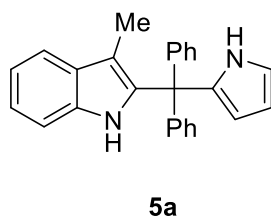

**2-(Diphenyl(1H-pyrrol-2-yl)methyl)-3-methyl-1H-indole (5a)** was prepared according to the General Procedure C as a white solid (chromatography eluent: petroleum ether/DCM = 8:1) in 65% yield (70.2 mg).

M.P. 187-188 °C.

$^1\text{H NMR}$  (400 MHz,  $\text{CDCl}_3$ )  $\delta$  8.00 (s, 1H), 7.77 (s, 1H), 7.57 (d,  $J = 7.0$  Hz, 1H), 7.36-7.28 (m, 6H), 7.25-7.12 (m, 7H), 6.76 (d,  $J = 1.4$  Hz, 1H), 6.24-6.22 (m, 1H), 6.05 (s, 1H), 1.71 (s, 3H) ppm.

$^{13}\text{C NMR}$  (100 MHz,  $\text{CDCl}_3$ )  $\delta$  144.5, 137.0, 135.2, 134.1, 130.3, 129.7, 128.3, 127.2,

121.8, 119.4, 118.5, 117.4, 110.9, 110.1, 110.0, 108.5, 56.4, 9.8 ppm.

**HRMS** (ES+) Calcd for C<sub>26</sub>H<sub>22</sub>N<sub>2</sub>Na [M + Na]<sup>+</sup>: 385.1681, Found: 385.1684.

**IR**  $\nu$  (KBr, cm<sup>-1</sup>) 3448, 3398, 3054, 2915, 1457, 1421, 1331, 1034.

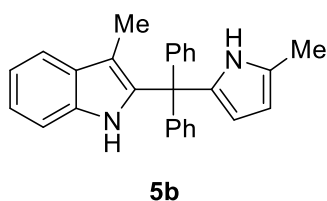

**3-Methyl-2-((5-methyl-1H-pyrrol-2-yl)diphenylmethyl)-1H-indole (5b)** was prepared according to the General Procedure C as a white solid (chromatography eluent: petroleum ether/DCM = 20:1) in 91% yield (102.3 mg). M.P. 179-181 °C.

<sup>1</sup>H NMR (400 MHz, CDCl<sub>3</sub>)  $\delta$  7.82 (s, 1H), 7.67 (s, 1H), 7.59-7.57 (m, 1H), 7.35-7.28 (m, 7H), 7.25-7.23 (m, 4H), 7.19-7.13 (m, 2H), 5.88 (d, *J* = 2.5 Hz, 2H), 2.24 (s, 3H), 1.73 (s, 3H) ppm.

<sup>13</sup>C NMR (100 MHz, CDCl<sub>3</sub>)  $\delta$  144.6, 137.2, 134.0, 133.6, 130.3, 129.7, 128.2, 127.5, 127.1, 121.7, 119.4, 118.5, 110.9, 110.3, 109.9, 106.2, 56.4, 13.4, 9.9 ppm.

**HRMS** (ES+) Calcd for C<sub>27</sub>H<sub>24</sub>N<sub>2</sub>Na [M + Na]<sup>+</sup>: 399.1837, Found: 399.1834.

**IR**  $\nu$  (KBr, cm<sup>-1</sup>) 3449, 3434, 1598, 1489, 1472, 1457, 1444.

#### IV. Gram-scale Synthesis and Bioactivity of Products

##### Gram-scale synthesis:

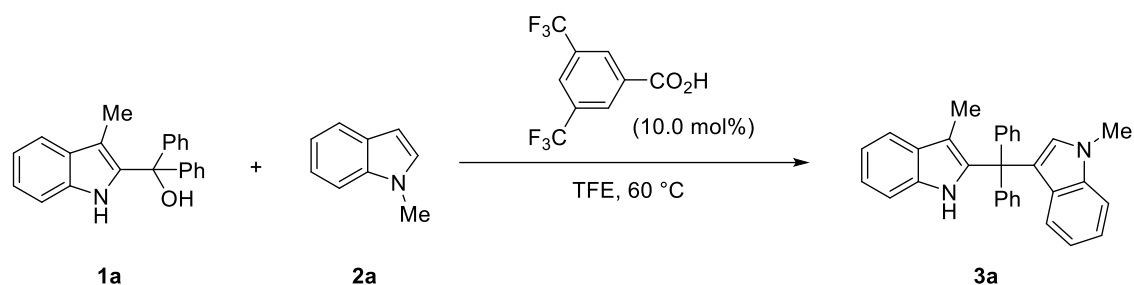

To a solution of 2-indolylmethanol **1a** (1.25 g, 4.0 mmol, 1.0 equiv), arene **2a** (1.05 g, 8.0 mmol, 2.0 equiv) in  $\text{CF}_3\text{CH}_2\text{OH}$  (40 mL) was added 3,5-bis(trifluoromethyl)benzoic acid (103.3 mg, 0.4 mmol, 10.0 mol%). The reaction mixture was warmed up to 60 °C and kept stirring for 24 h. The reaction mixture was directly concentrated under reduced pressure. The residue was purified by silica gel column chromatography (eluent: petroleum ether/DCM = 24:1) to afford the desired products **3a** in 83% yield (1.42 g).

## Bioactivity of Products

### Cell lines and cell culture conditions

L929, 4T1, HeLa and HepG2 cells were cultured in DMEM with 10% FBS and 50 U/mL penicillin and streptomycin.

### Cell viability test

MTT assay was applied to examine the cell viability. Cells ( $5 \times 10^3$  cells/well) were cultured in 96-well plates overnight. Then, the culture medium was removed, cells were washed with PBS, and the fresh medium containing various concentrations of the compounds was added to incubate with the cells for 24 h. After incubation, the medium was added with 20  $\mu$ L of MTT (5 mg/mL). After 4 h of incubation at 37 °C, the medium was aspirated, and 200  $\mu$ L DMSO was added into each well. The 96-well plates were placed on a shaker at 100 rpm for 10 min, then the absorptions at 570 nm were measured by a microplate reader (Multiskan FC, Thermo-Fisher, USA).

**Table S1.** Anticancer activity of selected products

| TAMs | IC <sub>50</sub> value ( $\mu$ M) <sup>a</sup> |      |      |       |
|------|------------------------------------------------|------|------|-------|
|      | L929                                           | 4T1  | Hela | HepG2 |
| 3c   | >50                                            | >50  | >50  | >50   |
| 3d   | >50                                            | 22.4 | 49.0 | >50   |
| 3f   | >50                                            | >50  | >50  | >50   |

|             |     |      |      |      |
|-------------|-----|------|------|------|
| <b>3g</b>   | >50 | 42.7 | >50  | >50  |
| <b>3h</b>   | >50 | >50  | 27.8 | >50  |
| <b>4e</b>   | >50 | >50  | 27.4 | >50  |
| <b>4f</b>   | >50 | 24.2 | >50  | >50  |
| <b>4g</b>   | >50 | >50  | >50  | >50  |
| Doxorubicin | >50 | 1.9  | 2.0  | 11.4 |

---

<sup>a</sup> The half maximal inhibitory concentration (IC<sub>50</sub>) was determined by MTT assay in 24h. Data were calculated from three independent experiments using OriginLab 2019 software.

## V. Determination of Product Structure

The structure of product **3b** was determined by X-ray diffraction. The X-ray data have been deposited at the Cambridge Crystallographic Data Center (CCDC 2363600). The data can be obtained free of charge via the internet at <https://www.ccdc.cam.ac.uk/structures/>. The measurements were taken in a Bruker D8 Venture CCD diffractometer. The data were integrated by Bruker D8 Venture with  $\lambda$  and  $\omega$  scans absorption corrections. The structure solution and refinement were processed by ShelXL (Rigaku OD, 2021).

**Method of crystallization:** A solution of **3b** in DCM and petroleum ether was evaporated the solvent slowly at room temperature.

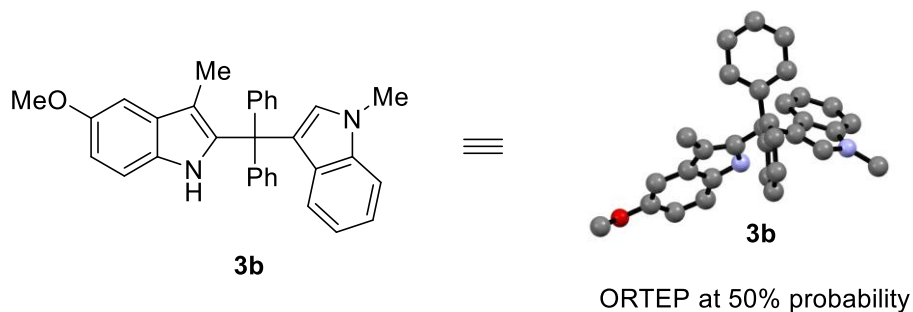

**Table S2 Crystal data and structure refinement for 3b.**

|                     |                                                               |
|---------------------|---------------------------------------------------------------|
| Identification code | <b>3b</b>                                                     |
| Empirical formula   | C <sub>32</sub> H <sub>28</sub> N <sub>2</sub> O <sub>5</sub> |
| Formula weight      | 456.56                                                        |
| Temperature/K       | 296.5                                                         |
| Crystal system      | monoclinic                                                    |
| Space group         | P21/n                                                         |
| a/Å                 | 21.5474(10)                                                   |
| b/Å                 | 11.3765(4)                                                    |
| c/Å                 | 22.1803(10)                                                   |



|                                               |                                                                |
|-----------------------------------------------|----------------------------------------------------------------|
| $\alpha/^\circ$                               | 90                                                             |
| $\beta/^\circ$                                | 113.870(5)                                                     |
| $\gamma/^\circ$                               | 90                                                             |
| Volume/ $\text{\AA}^3$                        | 4972.1(4)                                                      |
| Z                                             | 8                                                              |
| $\rho_{\text{calc}}/\text{g}/\text{cm}^3$     | 1.220                                                          |
| $\mu/\text{mm}^{-1}$                          | 0.074                                                          |
| F(000)                                        | 1936                                                           |
| Crystal size/ $\text{mm}^3$                   | $0.12 \times 0.15 \times 0.1$                                  |
| Radiation                                     | GaK $\alpha$ ( $\lambda = 0.71073$ )                           |
| $2\Theta$ range for data collection/ $^\circ$ | 2.002 to 27.9470                                               |
| Index ranges                                  | $-27 \leq h \leq 30, -16 \leq k \leq 15, -31 \leq l \leq 31$   |
| Reflections collected                         | 49527                                                          |
| Independent reflections                       | 14788 [ $R_{\text{int}} = 0.0557, R_{\text{sigma}} = 0.0820$ ] |
| Data/restraints/parameters                    | 14788/0/631                                                    |
| Goodness-of-fit on $F^2$                      | 1.129                                                          |
| Final R indexes [ $I \geq 2\sigma(I)$ ]       | $R_1 = 0.1169, wR_2 = 0.3338$                                  |
| Final R indexes [all data]                    | $R_1 = 0.2195, wR_2 = 0.3914$                                  |
| Largest diff. peak/hole / $e \text{\AA}^{-3}$ | 0.766/-0.473                                                   |

wj-4-70-1

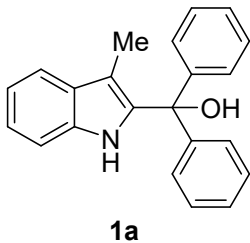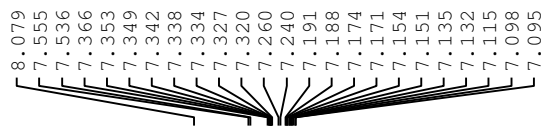

2.988

1.874

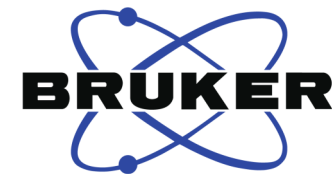

Current Data Parameters  
NAME 20230725-400M  
EXPNO 37  
PROCNO 1

F2 - Acquisition Parameters  
Date\_ 20230725  
Time 0.47  
INSTRUM spect  
PROBHD 5 mm PADUL 13C  
PULPROG zg30  
TD 65536  
SOLVENT CDC13  
NS 6  
DS 2  
SWH 8223.685 Hz  
FIDRES 0.125483 Hz  
AQ 3.9845889 sec  
RG 90.23  
DW 60.800 usec  
DE 6.50 usec  
TE 292.8 K  
D1 1.00000000 sec  
TD0 1

==== CHANNEL f1 =====  
NUC1 1H  
P1 9.90 usec  
PLW1 23.00000000 W  
SFO1 400.1924713 MHz

F2 - Processing parameters  
SI 65536  
SF 400.1900275 MHz  
WDW EM  
SSB 0  
LB 0.30 Hz  
GB 0  
PC 1.00

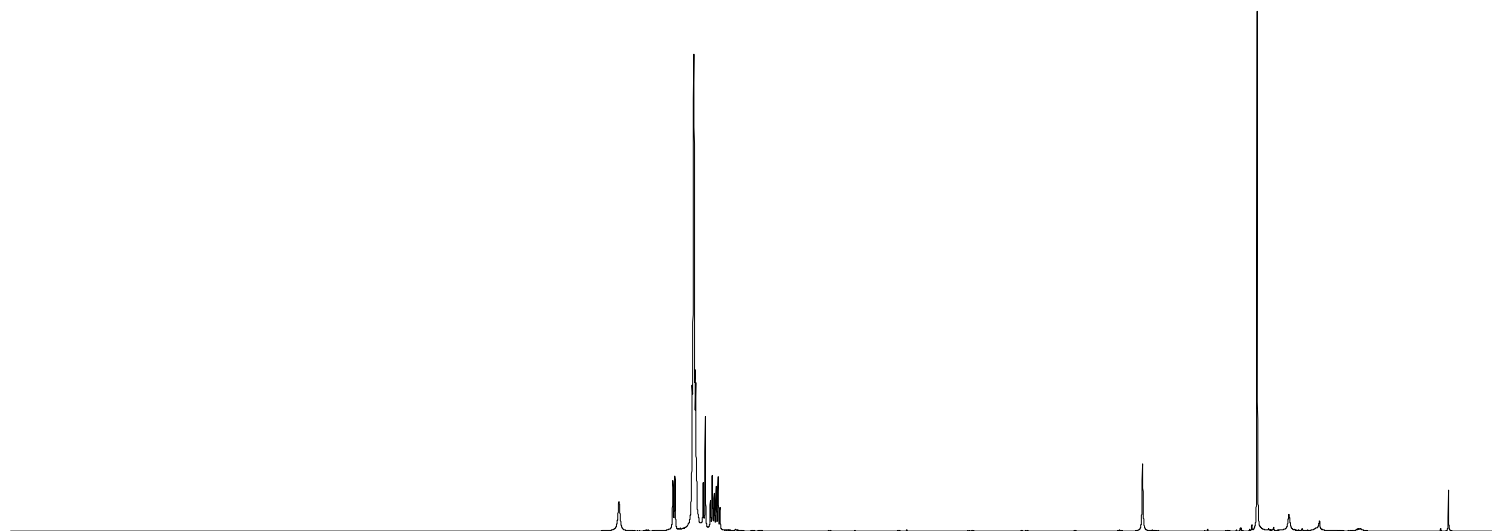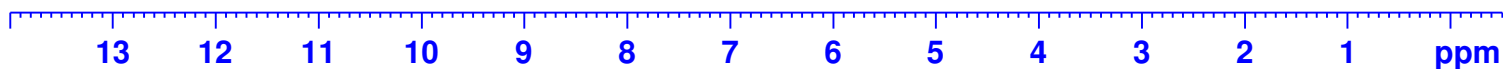

0.89  
1.08  
10.29  
0.92  
1.09  
1.08

0.91

3.00

wj-4-70-10

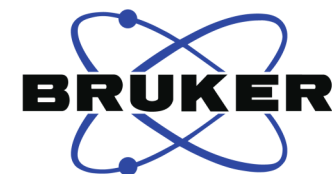

Current Data Parameters  
NAME 20230725-400M  
EXPNO 55  
PROCNO 1

F2 - Acquisition Parameters  
Date\_ 20230725  
Time 4.12  
INSTRUM spect  
PROBHD 5 mm PADUL 13C  
PULPROG zg30  
TD 65536  
SOLVENT CDCl3  
NS 6  
DS 2  
SWH 8223.685 Hz  
FIDRES 0.125483 Hz  
AQ 3.9845889 sec  
RG 113.67  
DW 60.800 usec  
DE 6.50 usec  
TE 293.0 K  
D1 1.00000000 sec  
TD0 1

==== CHANNEL f1 =====  
NUC1 1H  
P1 9.90 usec  
PLW1 23.00000000 W  
SFO1 400.1924713 MHz

F2 - Processing parameters  
SI 65536  
SF 400.1900140 MHz  
WDW EM  
SSB 0  
LB 0.30 Hz  
GB 0  
PC 1.00

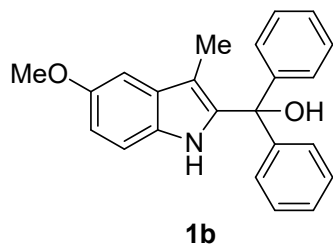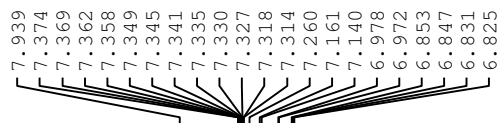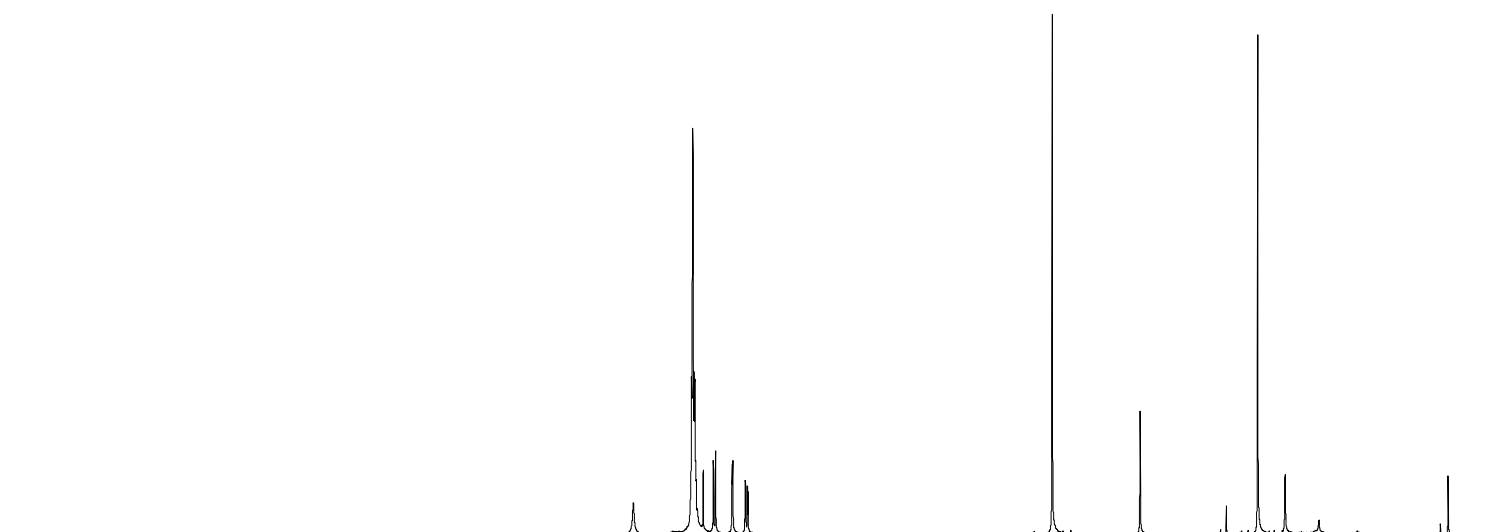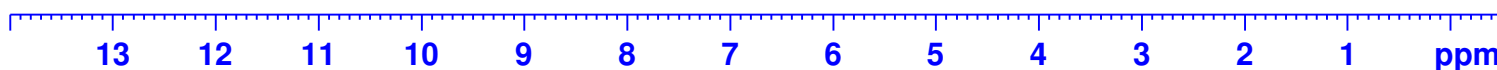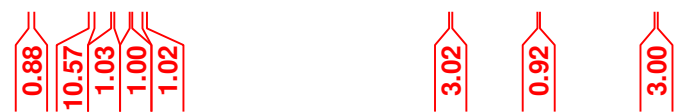

wj-4-70-6

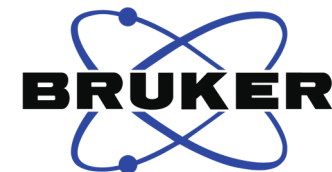

Current Data Parameters  
NAME 20230725-400M  
EXPNO 47  
PROCNO 1

F2 - Acquisition Parameters  
Date\_ 20230725  
Time 2.41  
INSTRUM spect  
PROBHD 5 mm PADUL 13C  
PULPROG zg30  
TD 65536  
SOLVENT CDC13  
NS 6  
DS 2  
SWH 8223.685 Hz  
FIDRES 0.125483 Hz  
AQ 3.9845889 sec  
RG 100.49  
DW 60.800 usec  
DE 6.50 usec  
TE 292.8 K  
D1 1.00000000 sec  
TD0 1

==== CHANNEL f1 =====  
NUC1 1H  
P1 9.90 usec  
PLW1 23.00000000 W  
SFO1 400.1924713 MHz

F2 - Processing parameters  
SI 65536  
SF 400.1900140 MHz  
WDW EM  
SSB 0  
LB 0.30 Hz  
GB 0  
PC 1.00

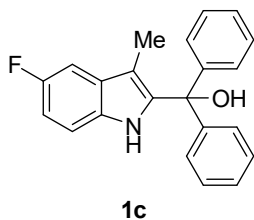

8.108  
7.360  
7.260  
7.188  
7.182  
7.177  
7.165  
7.156  
7.144  
6.940  
6.934  
6.918  
6.912  
6.895  
6.889

3.001

1.836

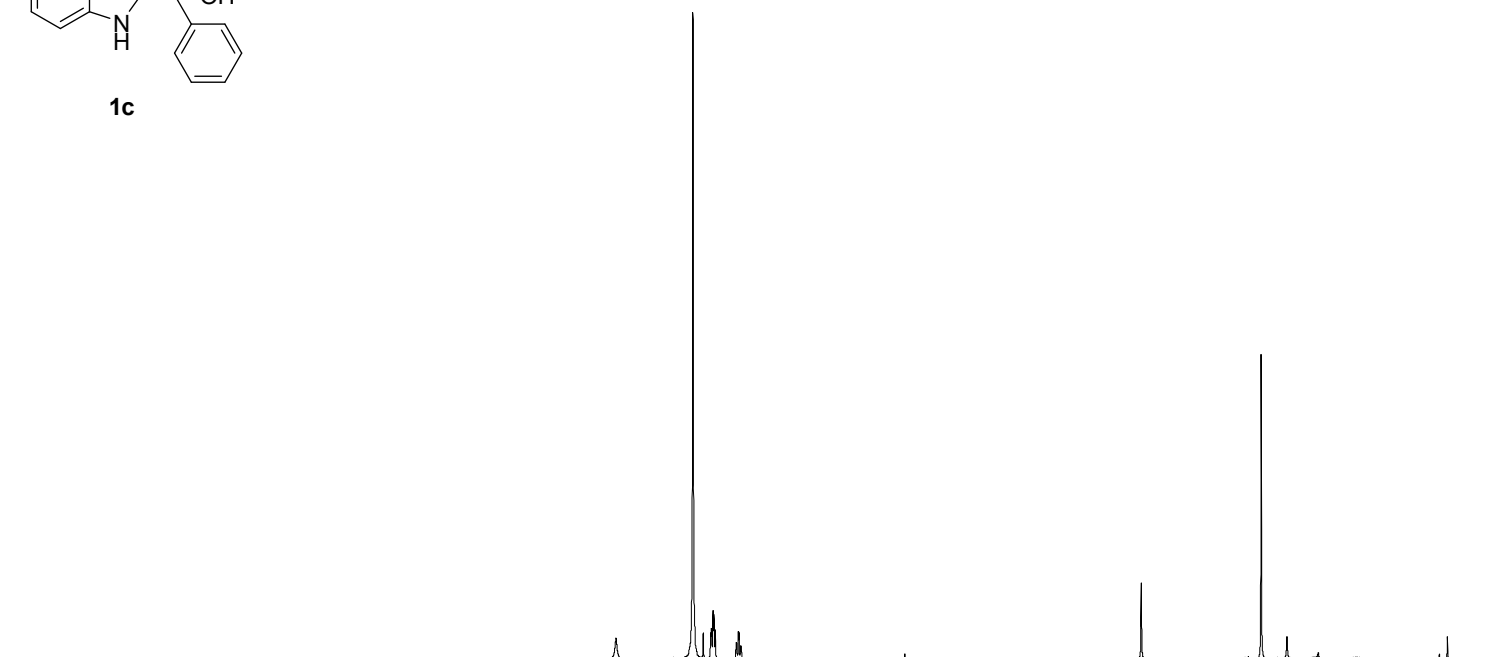

13 12 11 10 9 8 7 6 5 4 3 2 1 ppm

0.84

10.07

2.10

1.02

0.92

3.00

wj-4-70-8

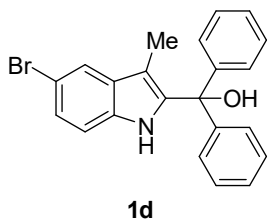

8.189  
7.658  
7.654  
7.390  
7.386  
7.381  
7.373  
7.371  
7.368  
7.361  
7.351  
7.344  
7.333  
7.322  
7.315  
7.260  
7.255  
7.251  
7.234  
7.229  
7.140  
7.119

2.985

1.815



Current Data Parameters  
NAME 20230725-400M  
EXPNO 51  
PROCNO 1

F2 - Acquisition Parameters  
Date\_ 20230725  
Time 3.26  
INSTRUM spect  
PROBHD 5 mm PADUL 13C  
PULPROG zg30  
TD 65536  
SOLVENT CDC13  
NS 6  
DS 2  
SWH 8223.685 Hz  
FIDRES 0.125483 Hz  
AQ 3.9845889 sec  
RG 125.76  
DW 60.800 usec  
DE 6.50 usec  
TE 292.8 K  
D1 1.00000000 sec  
TD0 1

==== CHANNEL f1 =====  
NUC1 1H  
P1 9.90 usec  
PLW1 23.00000000 W  
SFO1 400.1924713 MHz

F2 - Processing parameters  
SI 65536  
SF 400.1900140 MHz  
WDW EM  
SSB 0  
LB 0.30 Hz  
GB 0  
PC 1.00

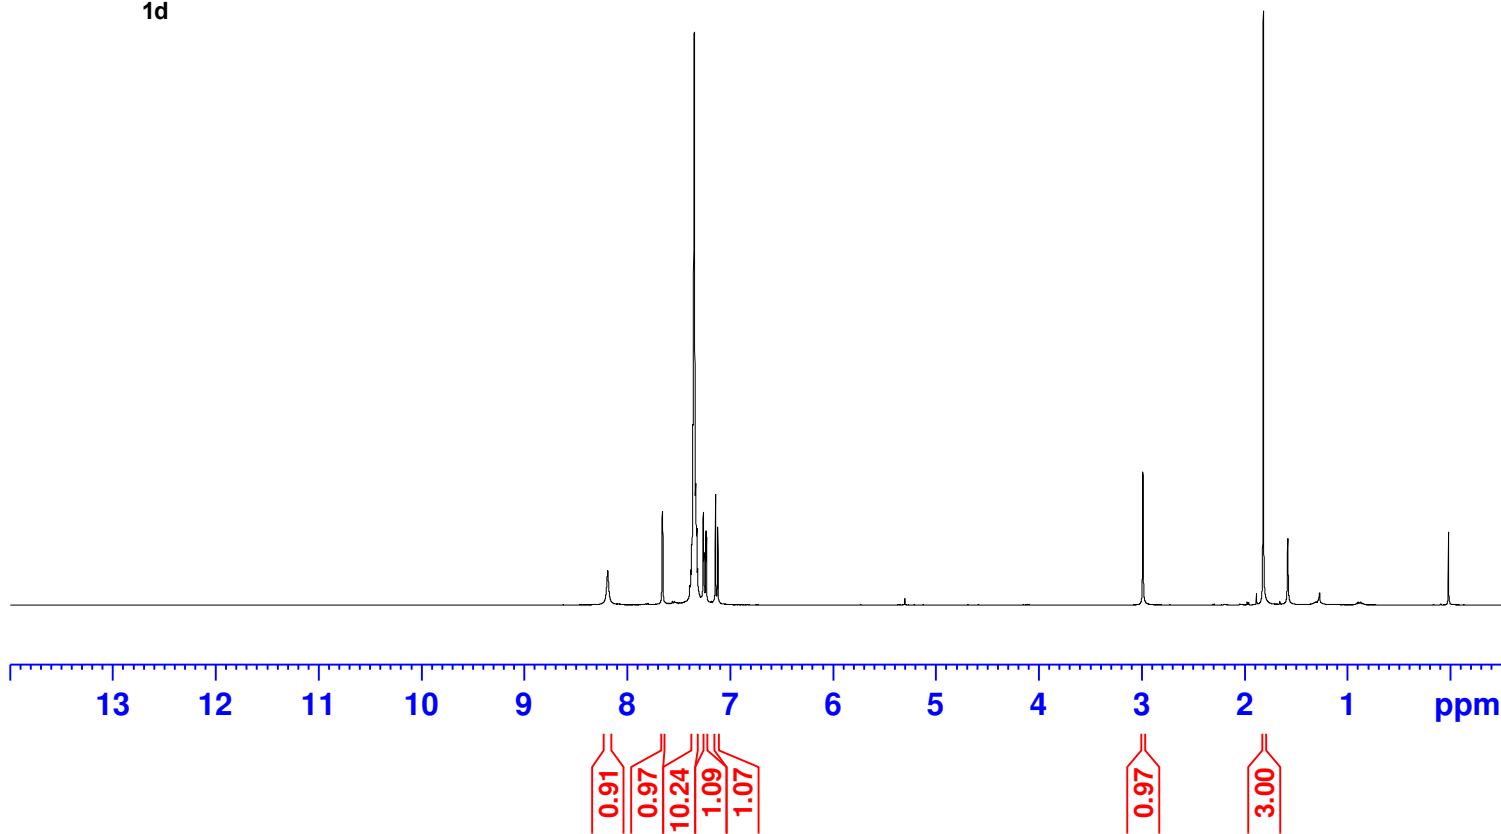

wj-4-70-11



Current Data Parameters  
NAME 20230725-400M  
EXPNO 57  
PROCNO 1

F2 - Acquisition Parameters  
Date\_ 20230725  
Time 7.55  
INSTRUM spect  
PROBHD 5 mm PADUL 13C  
PULPROG zg30  
TD 65536  
SOLVENT CDC13  
NS 6  
DS 2  
SWH 8223.685 Hz  
FIDRES 0.125483 Hz  
AQ 3.9845889 sec  
RG 100.49  
DW 60.800 usec  
DE 6.50 usec  
TE 293.0 K  
D1 1.00000000 sec  
TD0 1

==== CHANNEL f1 =====  
NUC1 1H  
P1 9.90 usec  
PLW1 23.00000000 W  
SFO1 400.1924713 MHz

F2 - Processing parameters  
SI 65536  
SF 400.1900139 MHz  
WDW EM  
SSB 0  
LB 0.30 Hz  
GB 0  
PC 1.00

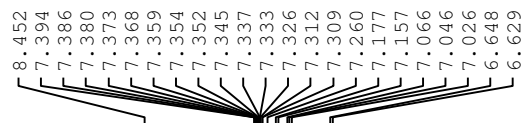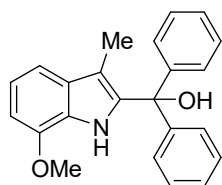

1e

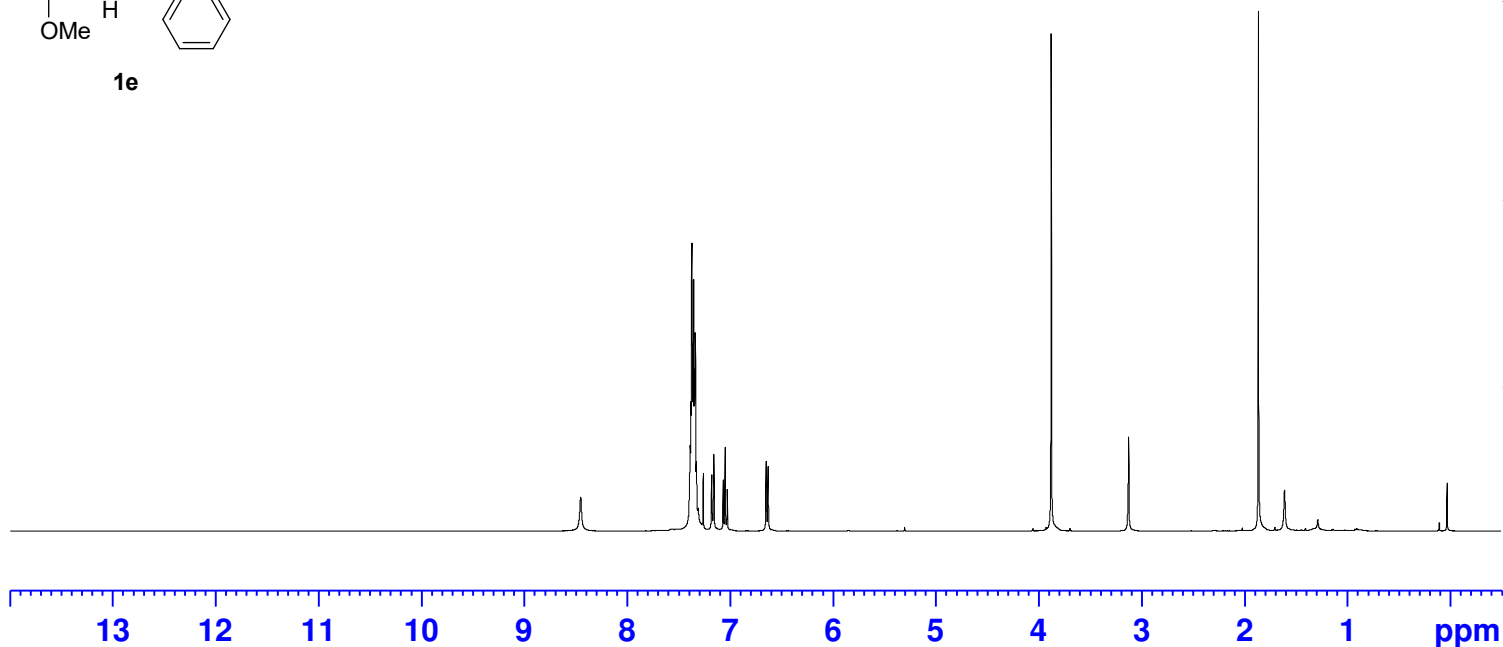

0.91

10.37

1.08

1.03

1.03

3.04

1.01

3.00

wj-4-70-13



Current Data Parameters  
NAME 20230730-400M  
EXPNO 52  
PROCNO 1

F2 - Acquisition Parameters  
Date\_ 20230729  
Time 19.45  
INSTRUM spect  
PROBHD 5 mm PADUL 13C  
PULPROG zg30  
TD 65536  
SOLVENT CDCl3  
NS 8  
DS 2  
SWH 8223.685 Hz  
FIDRES 0.125483 Hz  
AQ 3.9845889 sec  
RG 125.76  
DW 60.800 usec  
DE 6.50 usec  
TE 292.9 K  
D1 1.00000000 sec  
TD0 1

==== CHANNEL f1 =====  
NUC1 1H  
P1 9.90 usec  
PLW1 23.00000000 W  
SFO1 400.1924713 MHz

F2 - Processing parameters  
SI 65536  
SF 400.1900140 MHz  
WDW EM  
SSB 0  
LB 0.30 Hz  
GB 0  
PC 1.00

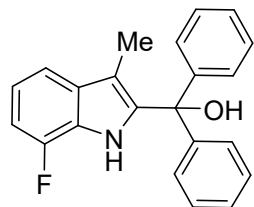

1f

8.351  
7.365  
7.312  
7.292  
7.260  
7.046  
7.034  
7.026  
7.014  
7.006  
6.994  
6.915  
6.895  
6.887  
6.867

3.000

1.860

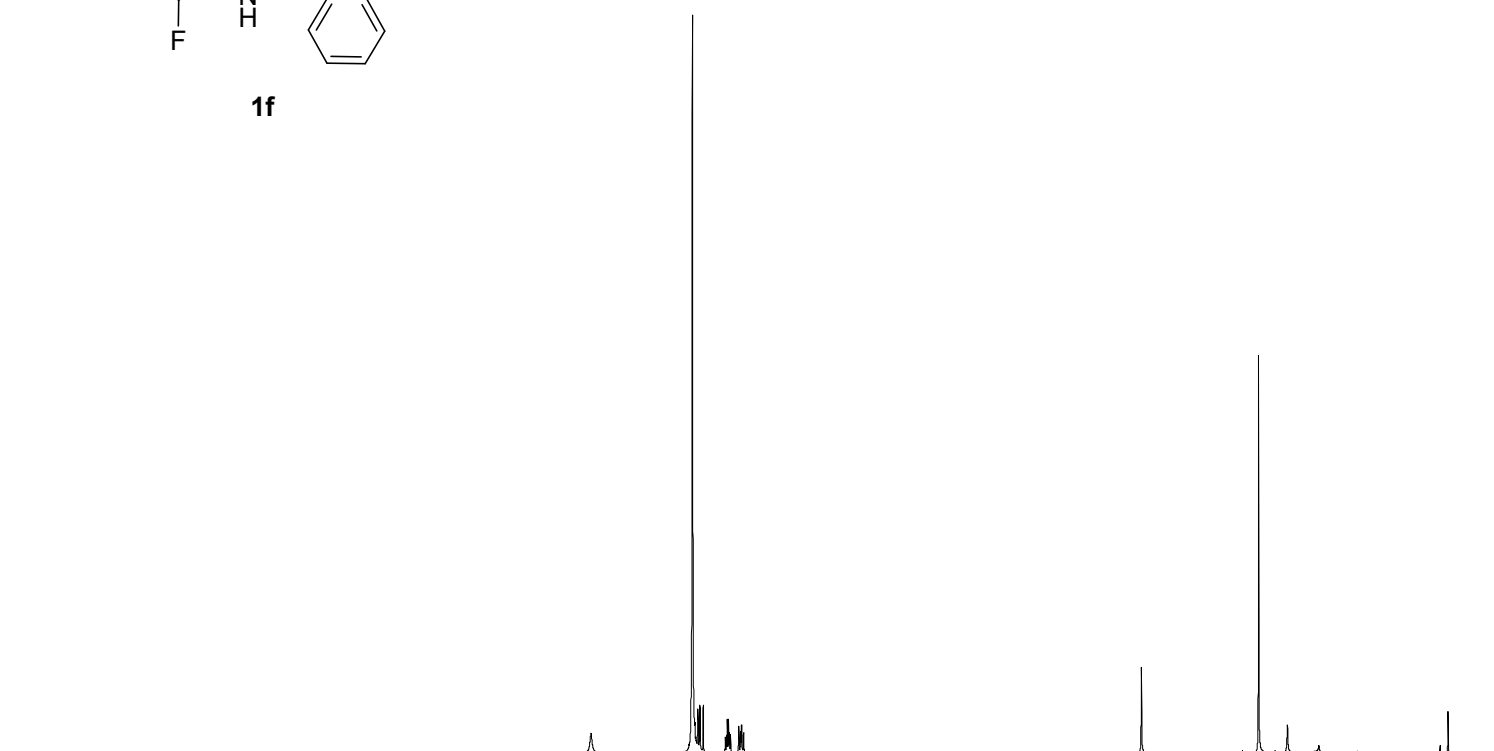

13 12 11 10 9 8 7 6 5 4 3 2 1 ppm

0.93

10.06

1.06

1.02

0.99

0.94

3.00

wj-4-70-9

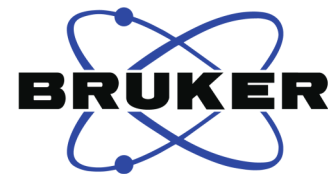

Current Data Parameters  
NAME 20230725-400M  
EXPNO 53  
PROCNO 1

F2 - Acquisition Parameters  
Date\_ 20230725  
Time 3.49  
INSTRUM spect  
PROBHD 5 mm PADUL 13C  
PULPROG zg30  
TD 65536  
SOLVENT CDC13  
NS 6  
DS 2  
SWH 8223.685 Hz  
FIDRES 0.125483 Hz  
AQ 3.9845889 sec  
RG 140.02  
DW 60.800 usec  
DE 6.50 usec  
TE 292.9 K  
D1 1.00000000 sec  
TD0 1

==== CHANNEL f1 =====  
NUC1 1H  
P1 9.90 usec  
PLW1 23.00000000 W  
SFO1 400.1924713 MHz

F2 - Processing parameters  
SI 65536  
SF 400.1900140 MHz  
WDW EM  
SSB 0  
LB 0.30 Hz  
GB 0  
PC 1.00

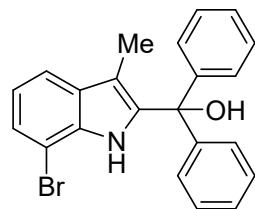

1g

8.418  
7.483  
7.463  
7.394  
7.363  
7.345  
7.339  
7.329  
7.320  
7.260  
7.014  
6.995  
6.975

3.011

1.809

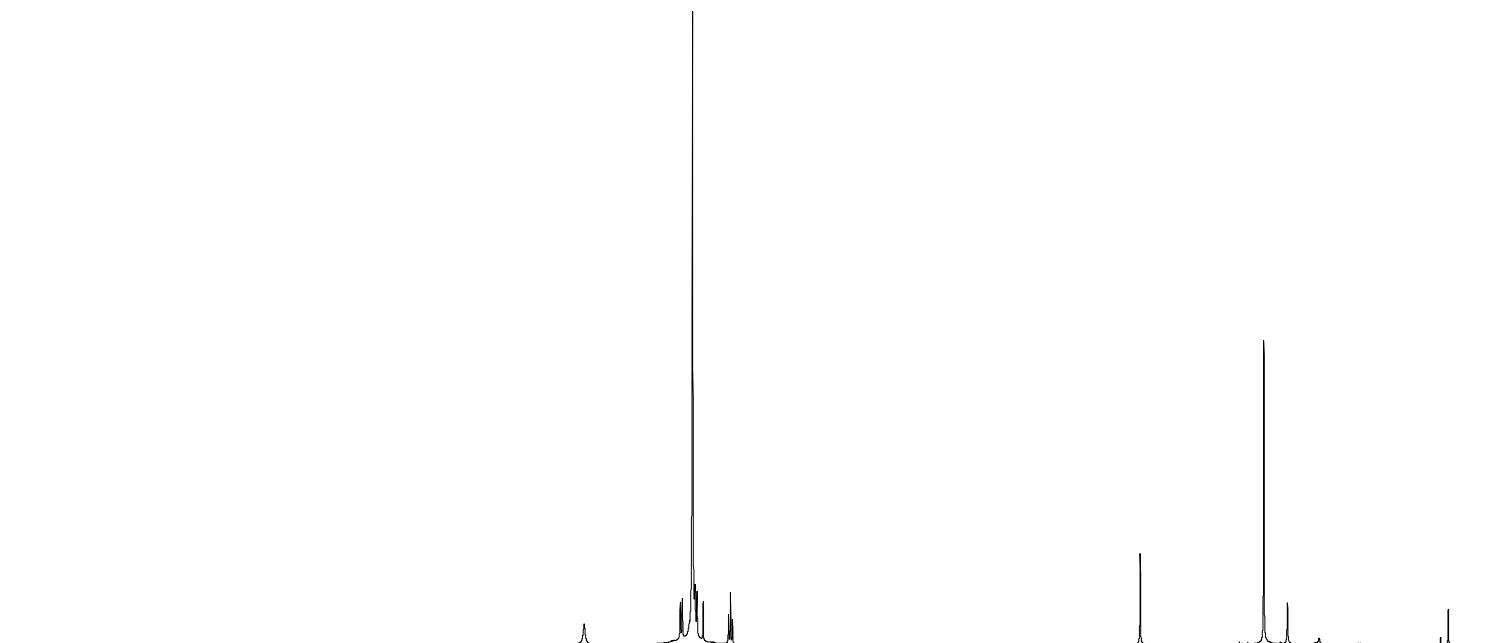

13 12 11 10 9 8 7 6 5 4 3 2 1 ppm

0.81

1.08

11.21

1.01

0.91

3.00





Current Data Parameters  
 NAME 20230726-400M  
 EXPNO 20  
 PROCNO 1

F2 - Acquisition Parameters  
 Date\_ 20230726  
 Time 7.41  
 INSTRUM spect  
 PROBHD 5 mm PADUL 13C  
 PULPROG zg30  
 TD 65536  
 SOLVENT CDC13  
 NS 6  
 DS 2  
 SWH 8223.685 Hz  
 FIDRES 0.125483 Hz  
 AQ 3.9845889 sec  
 RG 113.67  
 DW 60.800 usec  
 DE 6.50 usec  
 TE 292.9 K  
 D1 1.00000000 sec  
 TD0 1

==== CHANNEL f1 =====  
 NUC1 1H  
 P1 9.90 usec  
 PLW1 23.00000000 W  
 SFO1 400.1924713 MHz

F2 - Processing parameters  
 SI 65536  
 SF 400.1900204 MHz  
 WDW EM  
 SSB 0  
 LB 0.30 Hz  
 GB 0  
 PC 1.00

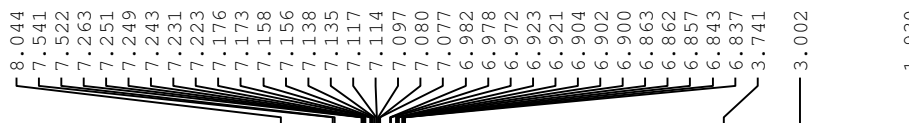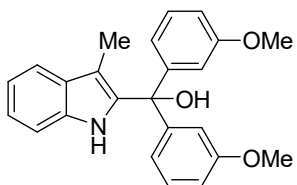

1h

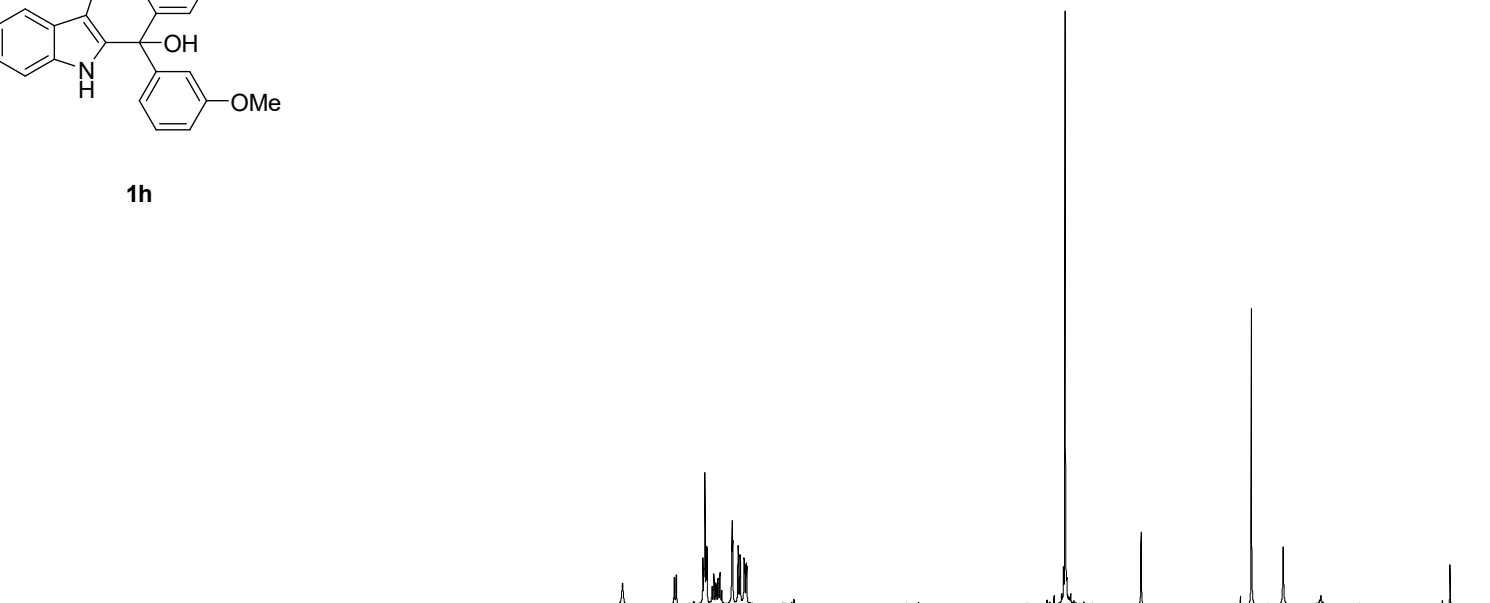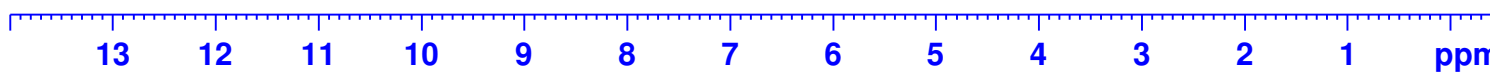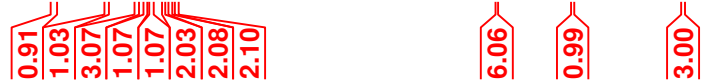

wj-4-70-14

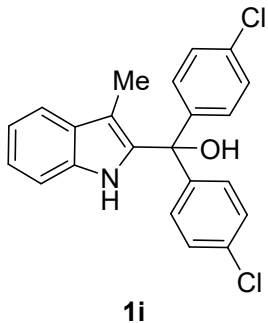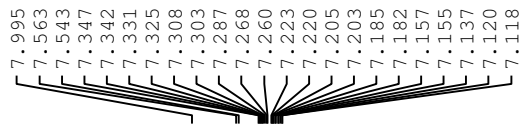

— 2.996

— 1.897

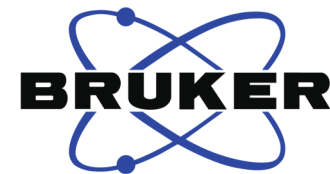

Current Data Parameters  
NAME 20230730-400M  
EXPNO 60  
PROCNO 1

F2 - Acquisition Parameters  
Date\_ 20230729  
Time 21.15  
INSTRUM spect  
PROBHD 5 mm PADUL 13C  
PULPROG zg30  
TD 65536  
SOLVENT CDC13  
NS 8  
DS 2  
SWH 8223.685 Hz  
FIDRES 0.125483 Hz  
AQ 3.9845889 sec  
RG 113.67  
DW 60.800 usec  
DE 6.50 usec  
TE 293.0 K  
D1 1.00000000 sec  
TD0 1

==== CHANNEL f1 =====  
NUC1 1H  
P1 9.90 usec  
PLW1 23.00000000 W  
SFO1 400.1924713 MHz

F2 - Processing parameters  
SI 65536  
SF 400.1900140 MHz  
WDW EM  
SSB 0  
LB 0.30 Hz  
GB 0  
PC 1.00

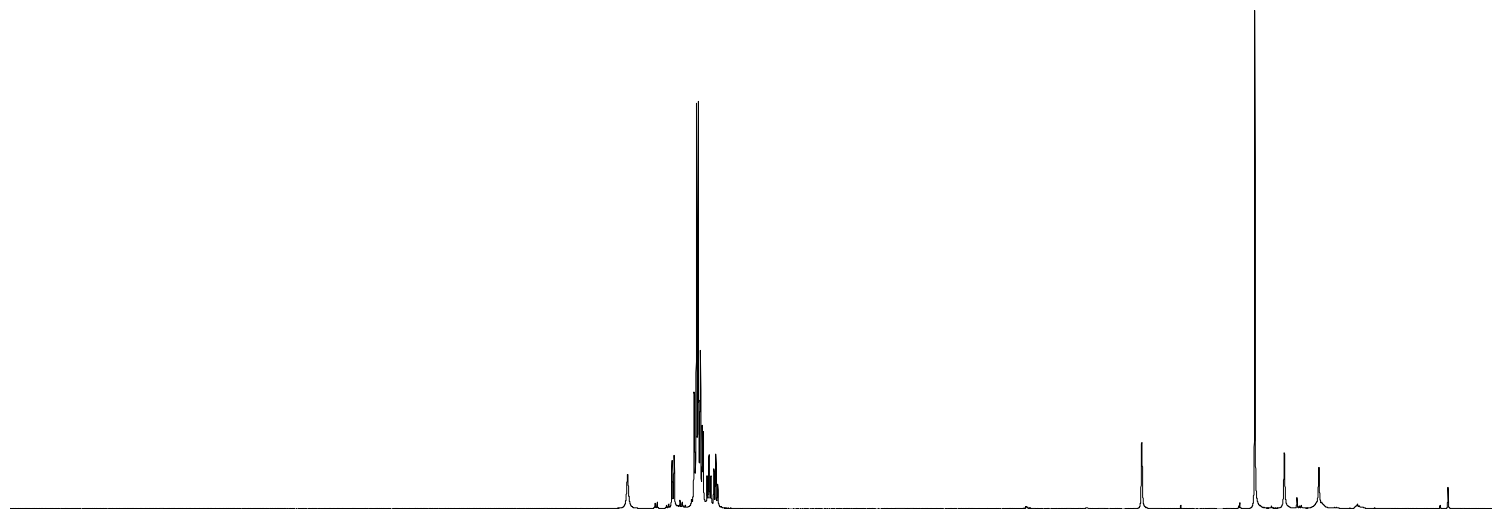

0.94  
1.02  
9.15  
1.10  
1.02

0.99

3.00

wj-4-70-7

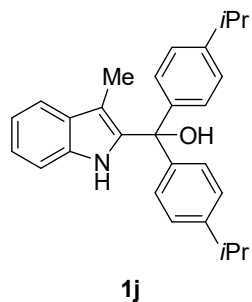

8.165  
7.556  
7.536  
7.281  
7.260  
7.210  
7.190  
7.172  
7.170  
7.153  
7.150  
7.134  
7.132  
7.114  
7.096  
7.091

2.965  
2.948  
2.931  
2.913  
2.896  
2.879  
2.862  
2.844  
1.872  
1.276  
1.258



Current Data Parameters  
NAME 20230725-400M  
EXPNO 49  
PROCNO 1

F2 - Acquisition Parameters  
Date\_ 20230725  
Time 3.03  
INSTRUM spect  
PROBHD 5 mm PADUL 13C  
PULPROG zg30  
TD 65536  
SOLVENT CDCl3  
NS 6  
DS 2  
SWH 8223.685 Hz  
FIDRES 0.125483 Hz  
AQ 3.9845889 sec  
RG 90.23  
DW 60.800 usec  
DE 6.50 usec  
TE 292.9 K  
D1 1.00000000 sec  
TD0 1

==== CHANNEL f1 =====  
NUC1 1H  
P1 9.90 usec  
PLW1 23.00000000 W  
SFO1 400.1924713 MHz

F2 - Processing parameters  
SI 65536  
SF 400.1900139 MHz  
WDW EM  
SSB 0  
LB 0.30 Hz  
GB 0  
PC 1.00

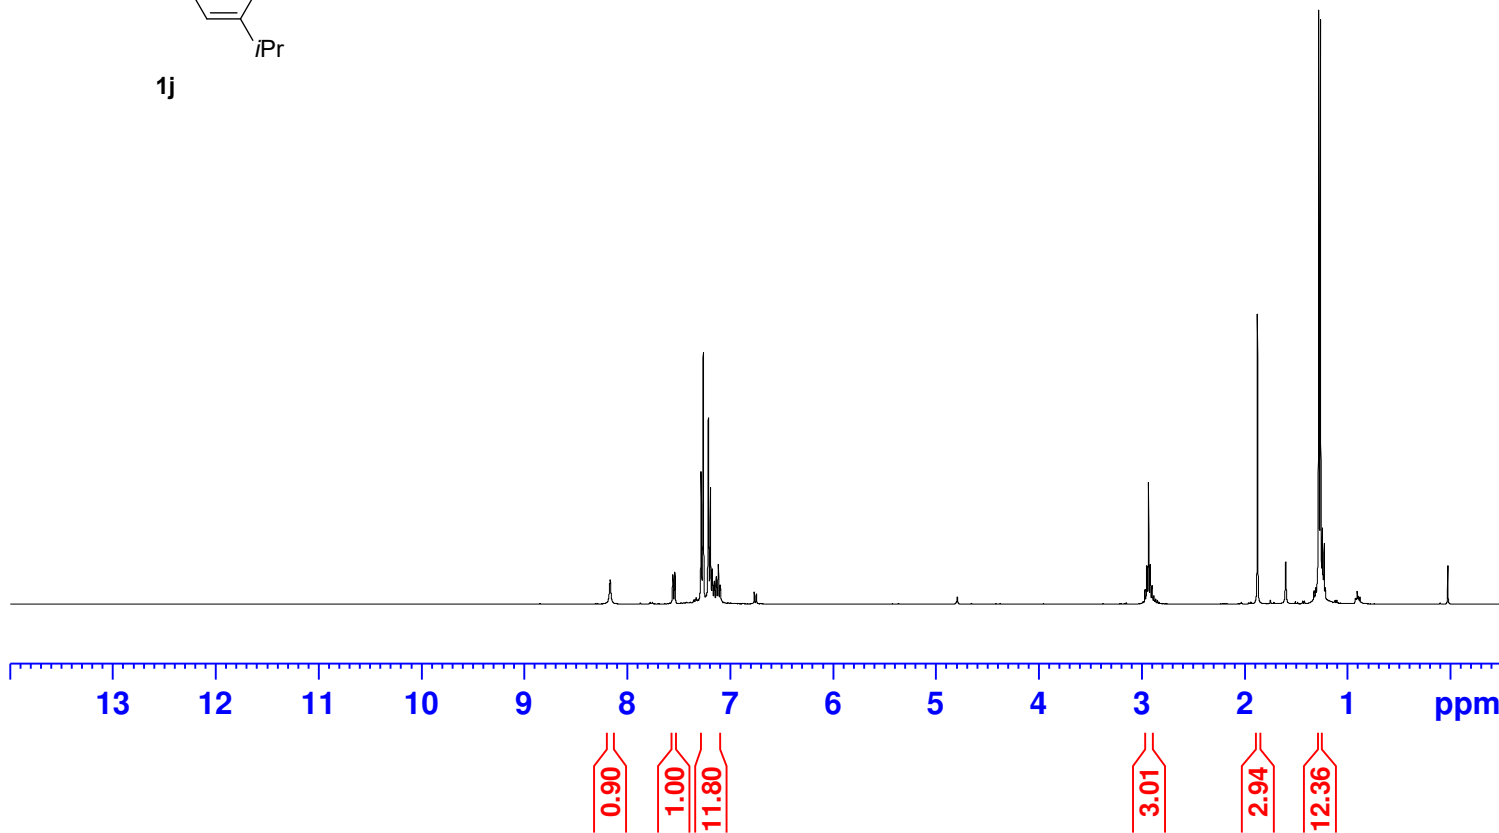

wj-4-70-5



Current Data Parameters  
NAME 20230725-400M  
EXPNO 45  
PROCNO 1

F2 - Acquisition Parameters  
Date\_ 20230725  
Time 2.18  
INSTRUM spect  
PROBHD 5 mm PADUL 13C  
PULPROG zg30  
TD 65536  
SOLVENT CDCl3  
NS 6  
DS 2  
SWH 8223.685 Hz  
FIDRES 0.125483 Hz  
AQ 3.9845889 sec  
RG 100.49  
DW 60.800 usec  
DE 6.50 usec  
TE 292.9 K  
D1 1.00000000 sec  
TD0 1

==== CHANNEL f1 =====  
NUC1 1H  
P1 9.90 usec  
PLW1 23.00000000 W  
SFO1 400.1924713 MHz

F2 - Processing parameters  
SI 65536  
SF 400.1900140 MHz  
WDW EM  
SSB 0  
LB 0.30 Hz  
GB 0  
PC 1.00

8.032  
7.583  
7.564  
7.292  
7.272  
7.260  
7.204  
7.202  
7.187  
7.184  
7.167  
7.164  
7.152  
7.149  
7.132  
7.115  
6.989  
6.976

2.885  
2.299  
1.951

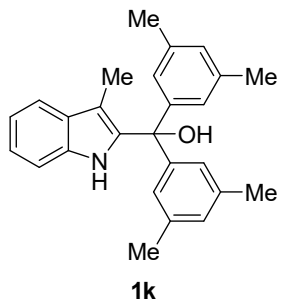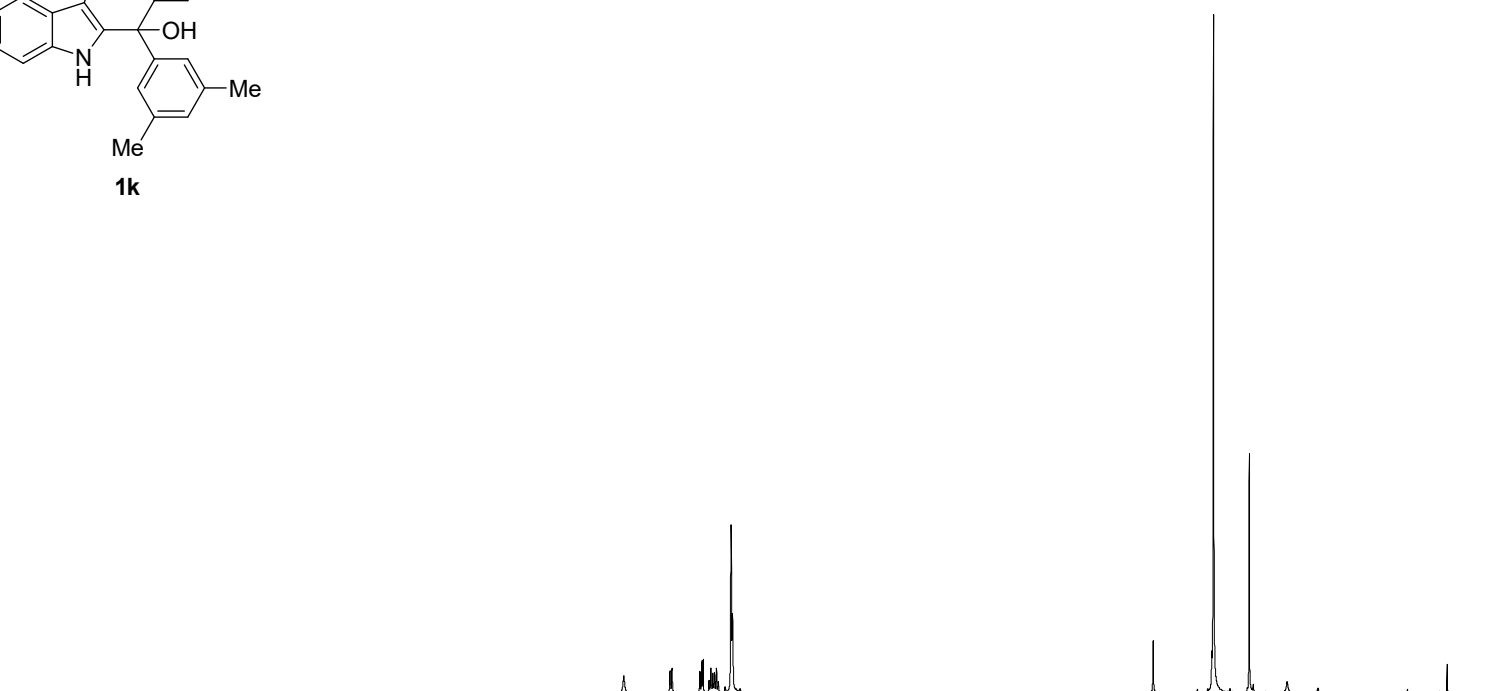

13 12 11 10 9 8 7 6 5 4 3 2 1 ppm

0.93  
1.00  
1.00  
1.10  
1.04  
4.02  
2.03  
0.93  
12.23  
3.00

wj-5-54-2



Current Data Parameters  
NAME 20231101-400  
EXPNO 31  
PROCNO 1

F2 - Acquisition Parameters  
Date\_ 20231101  
Time 0.42  
INSTRUM spect  
PROBHD 5 mm PADUL 13C  
PULPROG zg30  
TD 65536  
SOLVENT CDC13  
NS 8  
DS 2  
SWH 8223.685 Hz  
FIDRES 0.125483 Hz  
AQ 3.9845889 sec  
RG 61.19  
DW 60.800 usec  
DE 6.50 usec  
TE 291.9 K  
D1 1.00000000 sec  
TD0 1

==== CHANNEL f1 =====  
NUC1 1H  
P1 9.90 usec  
PLW1 23.00000000 W  
SFO1 400.1924713 MHz

F2 - Processing parameters  
SI 65536  
SF 400.1900138 MHz  
WDW EM  
SSB 0  
LB 0.30 Hz  
GB 0  
PC 1.00

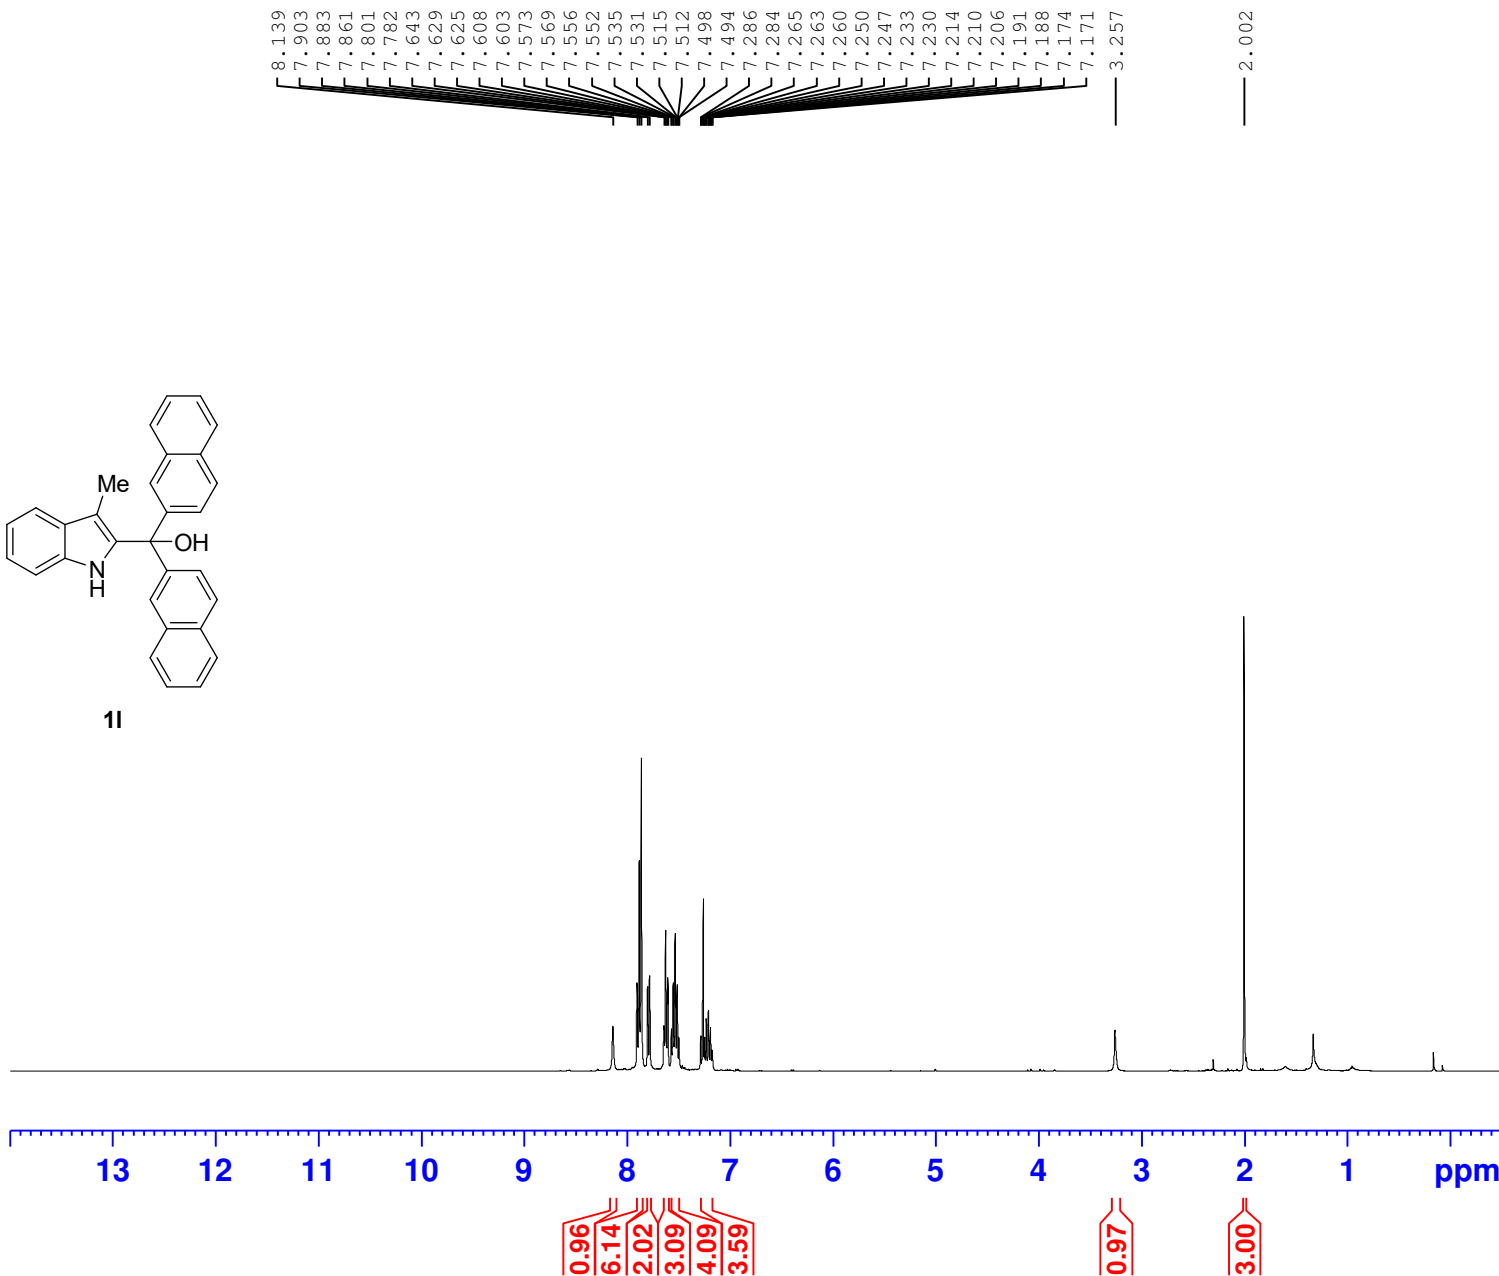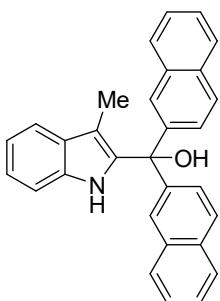

11

ncc-5-18

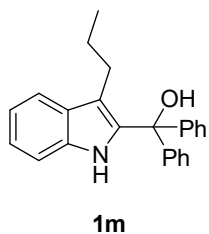

8.037  
7.542  
7.523  
7.298  
7.281  
7.279  
7.260  
7.169  
7.149  
7.140  
7.122  
7.120  
7.105  
7.103  
7.086  
7.068  
7.048  
7.031

3.061  
2.226  
2.206  
2.200  
2.185  
1.313  
1.294  
1.275  
1.255  
1.237  
1.217  
0.680  
0.662  
0.643



Current Data Parameters  
NAME 20240702-400M  
EXPNO 24  
PROCNO 1

F2 - Acquisition Parameters  
Date\_ 20240702  
Time 6.09  
INSTRUM spect  
PROBHD 5 mm PADUL 13C  
PULPROG zg30  
TD 65536  
SOLVENT CDC13  
NS 6  
DS 2  
SWH 8223.685 Hz  
FIDRES 0.125483 Hz  
AQ 3.9845889 sec  
RG 29.75  
DW 60.800 usec  
DE 6.50 usec  
TE 291.7 K  
D1 1.00000000 sec  
TD0 1

==== CHANNEL f1 =====  
NUC1 1H  
P1 9.90 usec  
PLW1 23.00000000 W  
SFO1 400.1924713 MHz

F2 - Processing parameters  
SI 65536  
SF 400.1900617 MHz  
WDW EM  
SSB 0  
LB 0.30 Hz  
GB 0  
PC 1.00

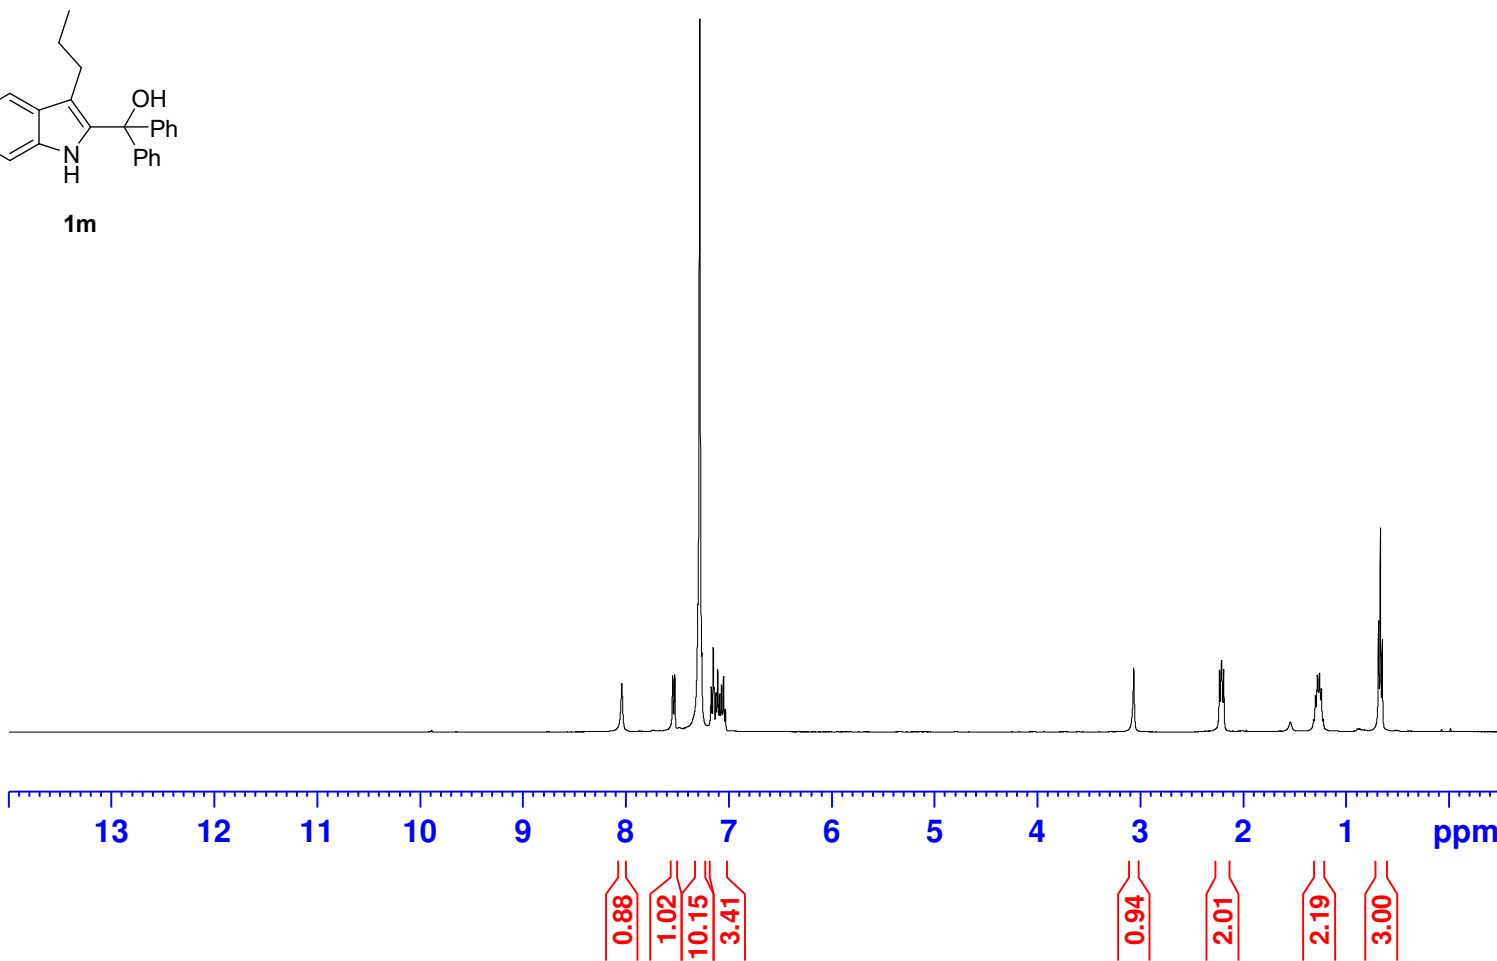

ncc-5-18

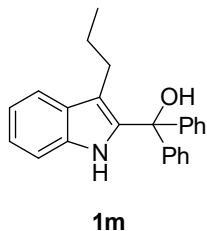

145.25  
137.08  
134.44  
129.41  
128.30  
127.98  
127.76  
122.06  
119.36  
119.22  
114.42  
111.03

79.46  
77.48  
77.16  
76.84

27.14  
23.68  
14.65



Current Data Parameters  
NAME 20240702-400M  
EXPNO 25  
PROCNO 1

F2 - Acquisition Parameters  
Date\_ 20240702  
Time 6.39  
INSTRUM spect  
PROBHD 5 mm PADUL 13C  
PULPROG zgpg30  
TD 65536  
SOLVENT CDC13  
NS 500  
DS 4  
SWH 24038.461 Hz  
FIDRES 0.366798 Hz  
AQ 1.3631488 sec  
RG 37.77  
DW 20.800 usec  
DE 6.50 usec  
TE 292.3 K  
D1 2.00000000 sec  
D11 0.03000000 sec  
TD0 1

==== CHANNEL f1 =====  
NUC1 13C  
P1 9.80 usec  
PLW1 47.40000153 W  
SFO1 100.6379178 MHz

==== CHANNEL f2 =====  
CPDPRG[2] waltz16  
NUC2 1H  
PCPD2 90.00 usec  
PLW2 23.00000000 W  
PLW12 0.30712000 W  
PLW13 0.24877000 W  
SFO2 400.1916008 MHz

F2 - Processing parameters  
SI 32768  
SF 100.6278573 MHz  
WDW EM  
SSB 0  
LB 1.00 Hz  
GB 0  
PC 1.40

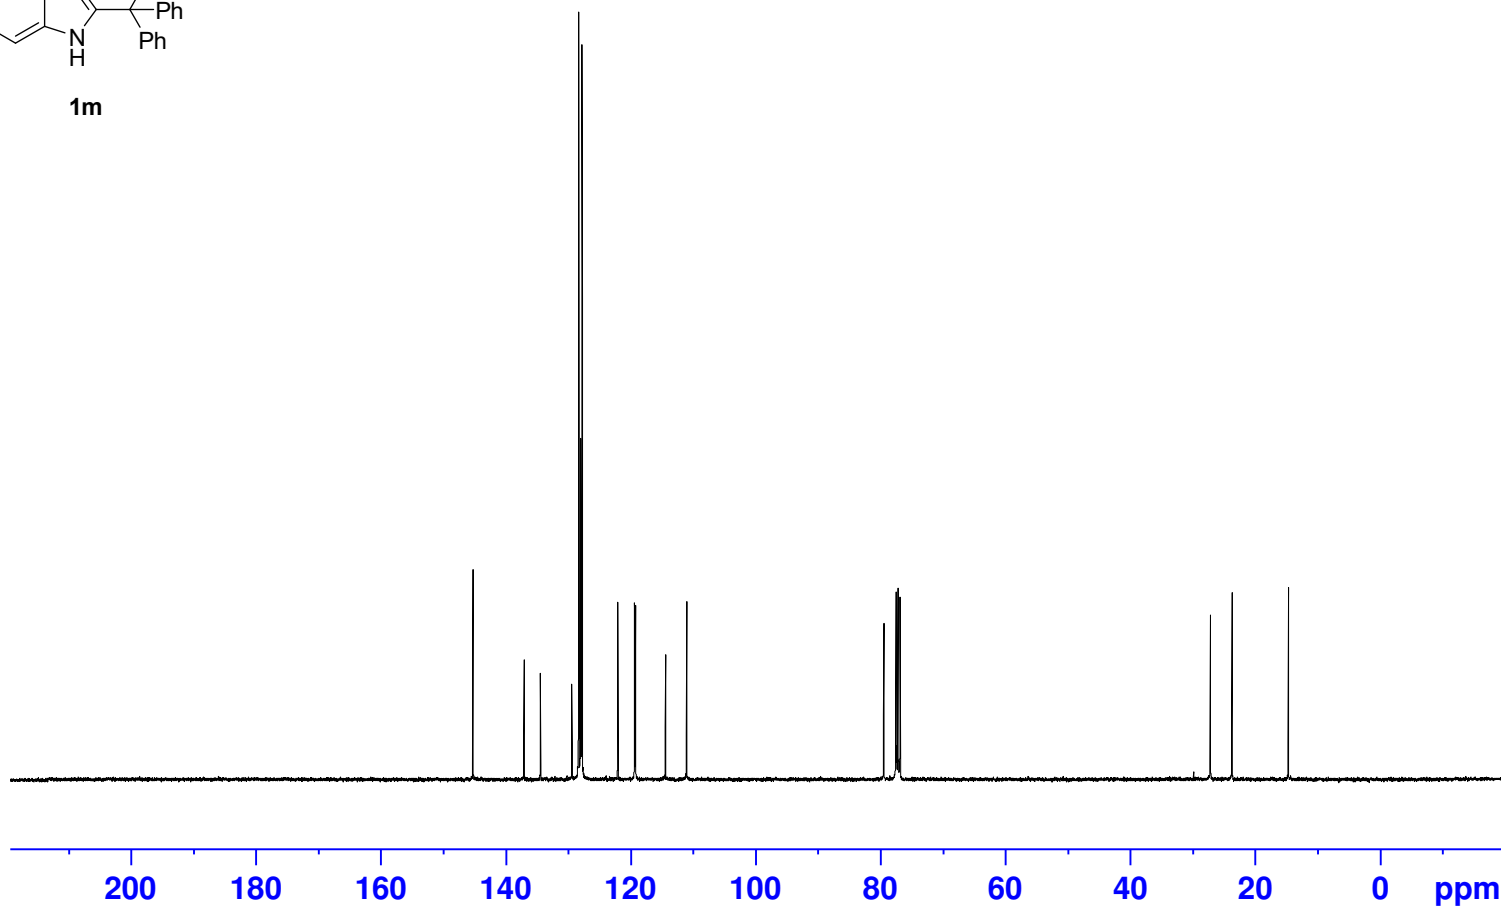

ncc-5-15-a

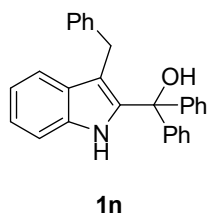

8.013  
7.465  
7.445  
7.397  
7.389  
7.386  
7.383  
7.340  
7.333  
7.325  
7.300  
7.279  
7.260  
7.221  
7.203  
7.177  
7.159  
7.139  
7.110  
7.092  
7.073  
6.993  
6.977

3.855

2.882  
2.876



Current Data Parameters  
NAME 20240625-400M  
EXPNO 17  
PROCNO 1

F2 - Acquisition Parameters  
Date\_ 20240624  
Time 23.53  
INSTRUM spect  
PROBHD 5 mm PADUL 13C  
PULPROG zg30  
TD 65536  
SOLVENT CDCl3  
NS 6  
DS 2  
SWH 8223.685 Hz  
FIDRES 0.125483 Hz  
AQ 3.9845889 sec  
RG 61.19  
DW 60.800 usec  
DE 6.50 usec  
TE 291.2 K  
D1 1.00000000 sec  
TD0 1

==== CHANNEL f1 =====  
NUC1 1H  
P1 9.90 usec  
PLW1 23.00000000 W  
SFO1 400.1924713 MHz

F2 - Processing parameters  
SI 65536  
SF 400.1900141 MHz  
WDW EM  
SSB 0  
LB 0.30 Hz  
GB 0  
PC 1.00

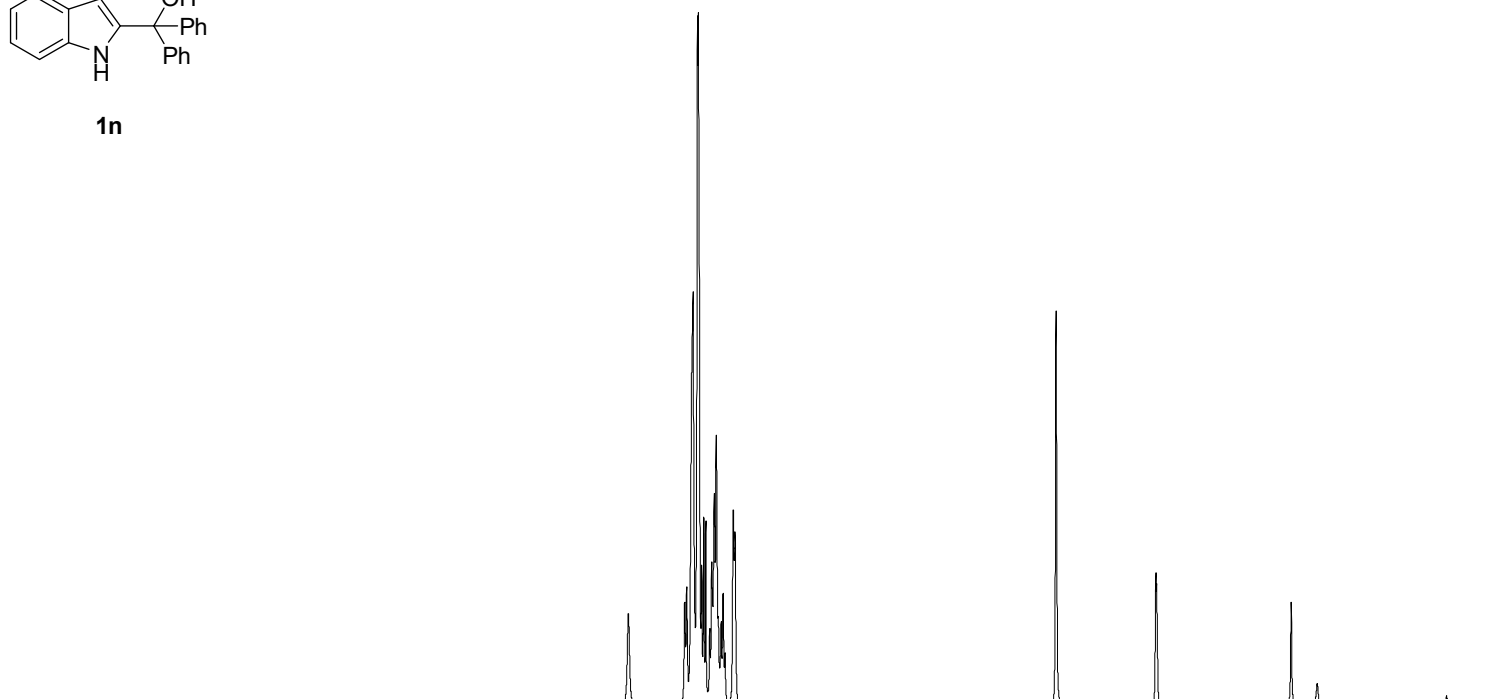

13 12 11 10 9 8 7 6 5 4 3 2 1 ppm

0.93  
12.50  
5.25  
2.01

2.00  
1.02



ncc-5-15-a

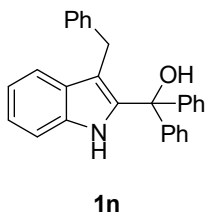

144.86  
141.30  
138.73  
134.33  
129.79  
128.42  
128.39  
128.30  
127.99  
127.56  
125.84  
122.30  
119.72  
119.59  
111.88  
111.07

79.13  
77.47  
77.15  
76.84

30.50



Current Data Parameters  
NAME 20240625-400M  
EXPNO 18  
PROCNO 1

F2 - Acquisition Parameters  
Date\_ 20240625  
Time 0.40  
INSTRUM spect  
PROBHD 5 mm PADUL 13C  
PULPROG zgpg30  
TD 65536  
SOLVENT CDC13  
NS 800  
DS 4  
SWH 24038.461 Hz  
FIDRES 0.366798 Hz  
AQ 1.3631488 sec  
RG 50.16  
DW 20.800 usec  
DE 6.50 usec  
TE 292.0 K  
D1 2.00000000 sec  
D11 0.03000000 sec  
TD0 1

==== CHANNEL f1 =====  
NUC1 13C  
P1 9.80 usec  
PLW1 47.40000153 W  
SFO1 100.6379178 MHz

==== CHANNEL f2 =====  
CPDPRG[2] waltz16  
NUC2 1H  
PCPD2 90.00 usec  
PLW2 23.00000000 W  
PLW12 0.30712000 W  
PLW13 0.24877000 W  
SFO2 400.1916008 MHz

F2 - Processing parameters  
SI 32768  
SF 100.6278529 MHz  
WDW EM  
SSB 0  
LB 1.00 Hz  
GB 0  
PC 1.40

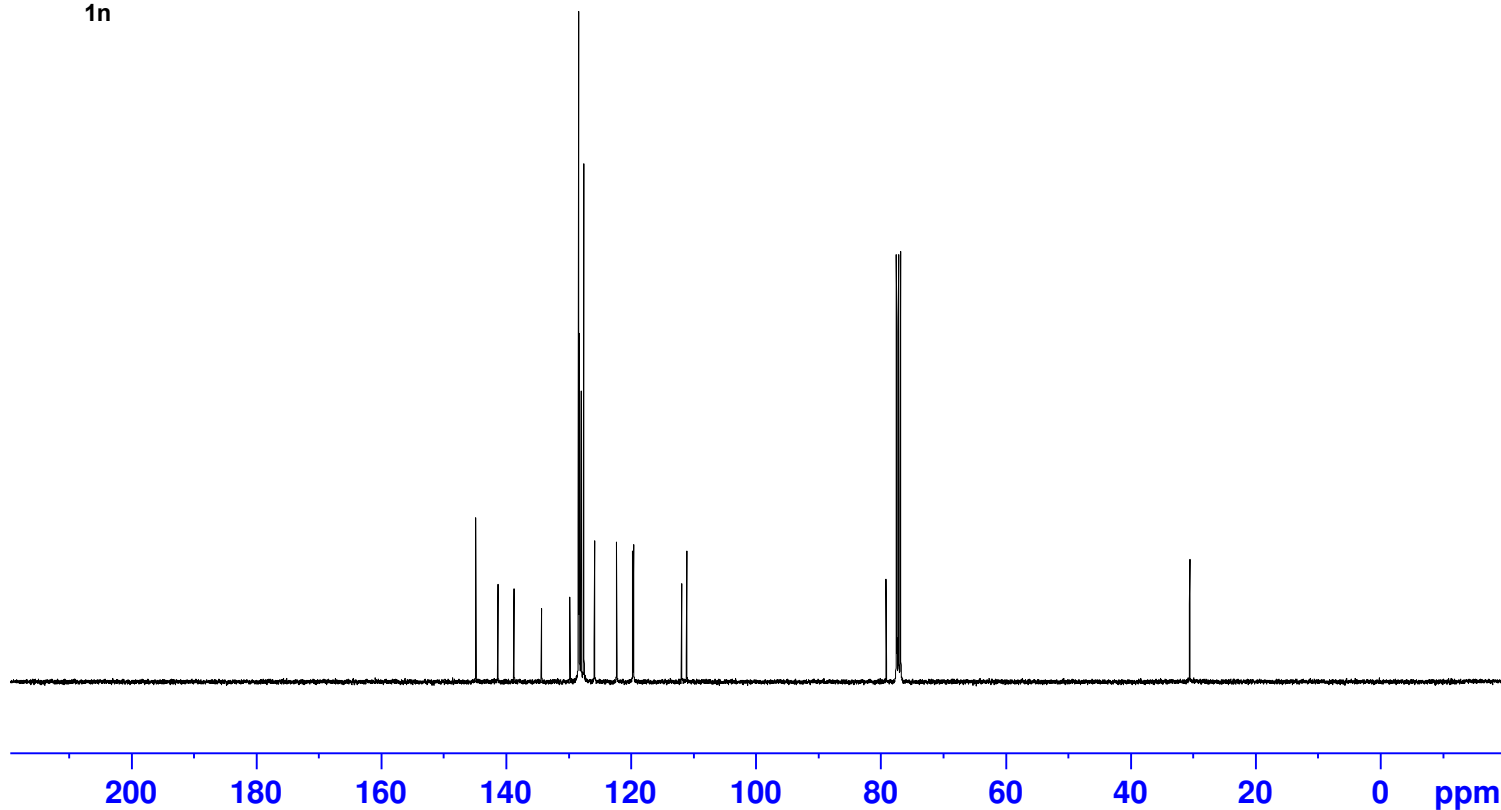

ncc-5-16

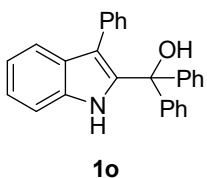

7.843  
7.465  
7.446  
7.295  
7.260  
7.224  
7.211  
7.208  
7.182  
7.152  
7.146  
7.133  
7.128  
7.105  
7.087

3.247



Current Data Parameters  
NAME 20240628-400M  
EXPNO 20  
PROCNO 1

F2 - Acquisition Parameters  
Date\_ 20240627  
Time 22.59  
INSTRUM spect  
PROBHD 5 mm PADUL 13C  
PULPROG zg30  
TD 65536  
SOLVENT CDC13  
NS 6  
DS 2  
SWH 8223.685 Hz  
FIDRES 0.125483 Hz  
AQ 3.9845889 sec  
RG 68.24  
DW 60.800 usec  
DE 6.50 usec  
TE 291.4 K  
D1 1.00000000 sec  
TD0 1

==== CHANNEL f1 =====  
NUC1 1H  
P1 9.90 usec  
PLW1 23.00000000 W  
SFO1 400.1924713 MHz

F2 - Processing parameters  
SI 65536  
SF 400.1900285 MHz  
WDW EM  
SSB 0  
LB 0.30 Hz  
GB 0  
PC 1.00

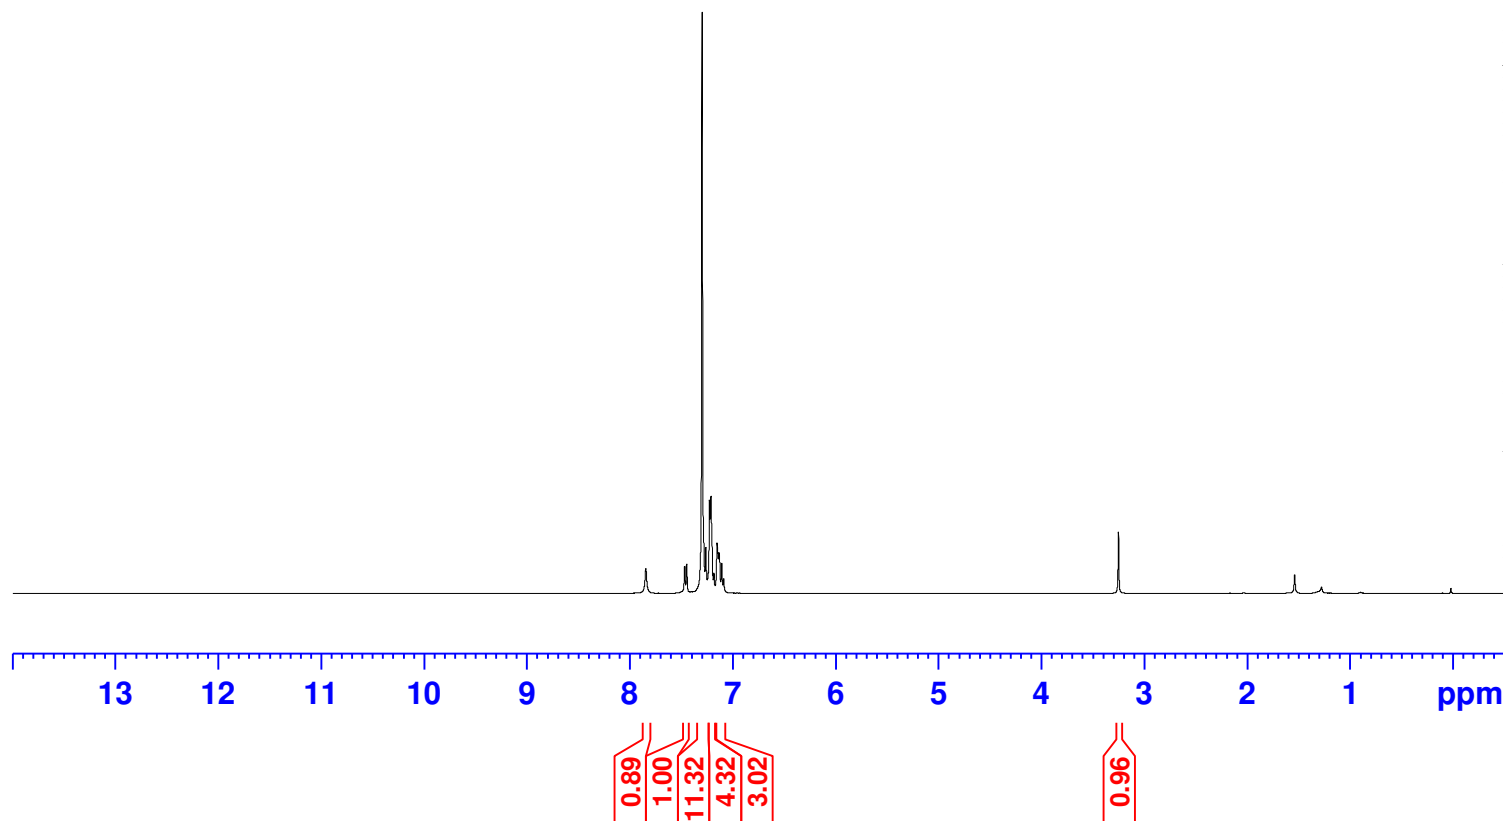

ncc-5-16

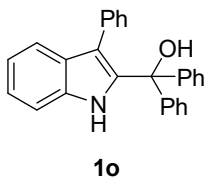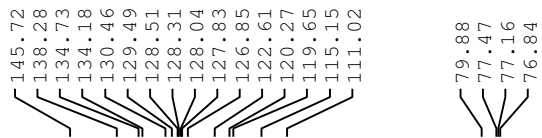

Current Data Parameters  
NAME 20240628-400M  
EXPNO 21  
PROCNO 1

F2 - Acquisition Parameters  
Date\_ 20240627  
Time 23.29  
INSTRUM spect  
PROBHD 5 mm PADUL 13C  
PULPROG zgpg30  
TD 65536  
SOLVENT CDC13  
NS 500  
DS 4  
SWH 24038.461 Hz  
FIDRES 0.366798 Hz  
AQ 1.3631488 sec  
RG 35.06  
DW 20.800 usec  
DE 6.50 usec  
TE 292.0 K  
D1 2.00000000 sec  
D11 0.03000000 sec  
TD0 1

==== CHANNEL f1 =====  
NUC1 13C  
P1 9.80 usec  
PLW1 47.4000153 W  
SFO1 100.6379178 MHz

==== CHANNEL f2 =====  
CPDPRG[2] waltz16  
NUC2 1H  
PCPD2 90.00 usec  
PLW2 23.00000000 W  
PLW12 0.30712000 W  
PLW13 0.24877000 W  
SFO2 400.1916008 MHz

F2 - Processing parameters  
SI 32768  
SF 100.6278521 MHz  
WDW EM  
SSB 0  
LB 1.00 Hz  
GB 0  
PC 1.40

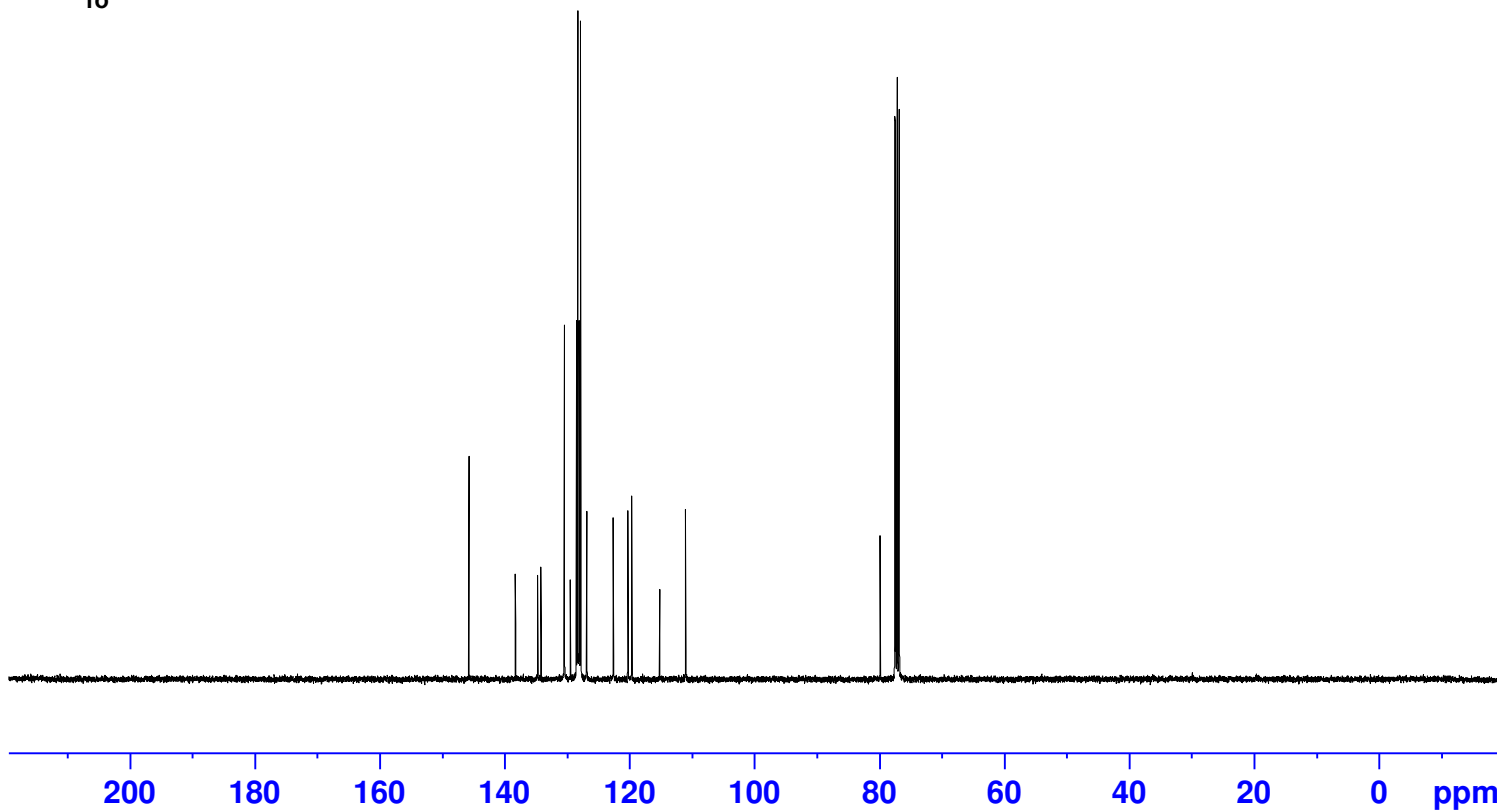

ncc-2-34

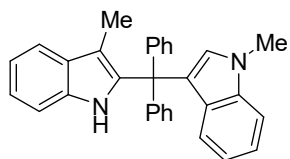

3a

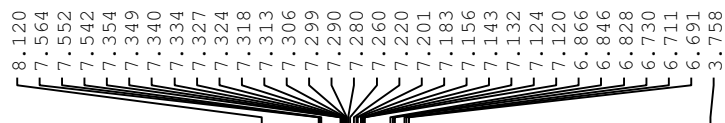

1.672



Current Data Parameters  
NAME 20231021-400M  
EXPNO 28  
PROCNO 1

F2 - Acquisition Parameters  
Date\_ 20231020  
Time 23.41  
INSTRUM spect  
PROBHD 5 mm PADUL 13C  
PULPROG zg30  
TD 65536  
SOLVENT CDC13  
NS 6  
DS 2  
SWH 8223.685 Hz  
FIDRES 0.125483 Hz  
AQ 3.9845889 sec  
RG 90.23  
DW 60.800 usec  
DE 6.50 usec  
TE 293.9 K  
D1 1.00000000 sec  
TD0 1

==== CHANNEL f1 =====  
NUC1 1H  
P1 9.90 usec  
PLW1 23.00000000 W  
SFO1 400.1924713 MHz

F2 - Processing parameters  
SI 65536  
SF 400.1900139 MHz  
WDW EM  
SSB 0  
LB 0.30 Hz  
GB 0  
PC 1.00

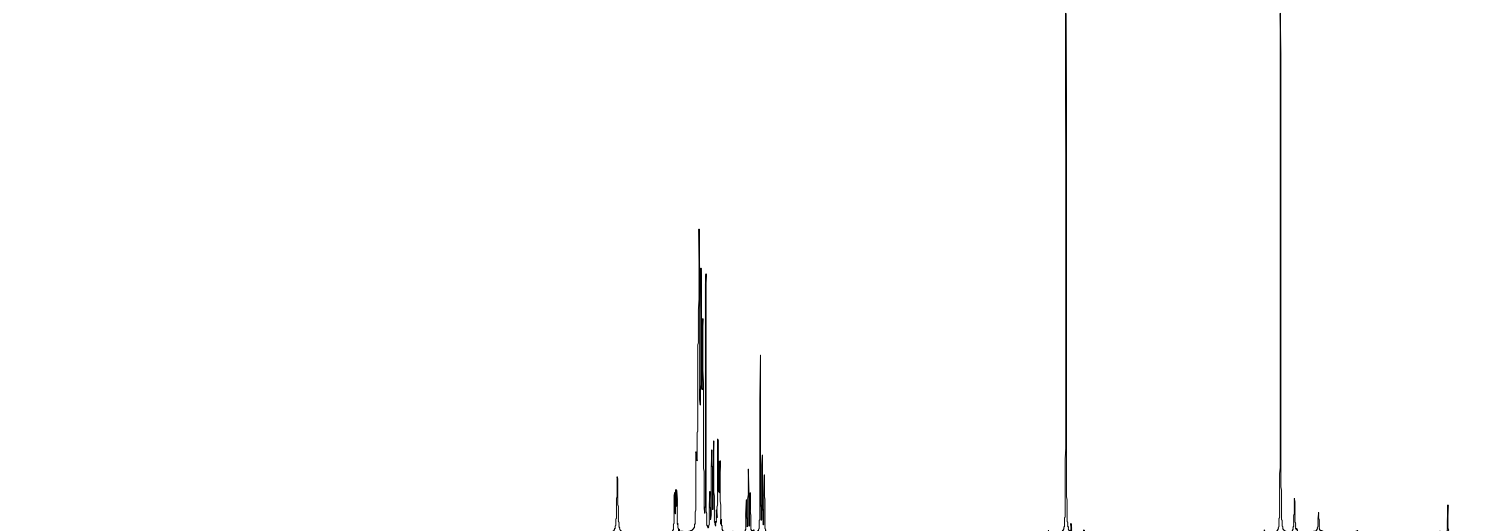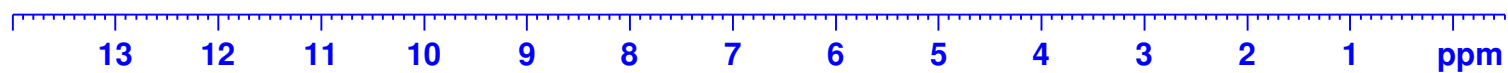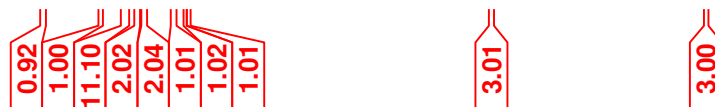

ncc-2-34

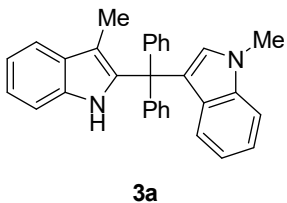

144.50  
138.69  
138.03  
133.72  
130.56  
130.29  
130.13  
127.95  
127.54  
126.62  
121.99  
121.78  
121.21  
120.53  
119.43  
119.06  
118.26  
110.79  
109.43  
109.18

77.47  
77.15  
76.84

55.32

32.96

10.31

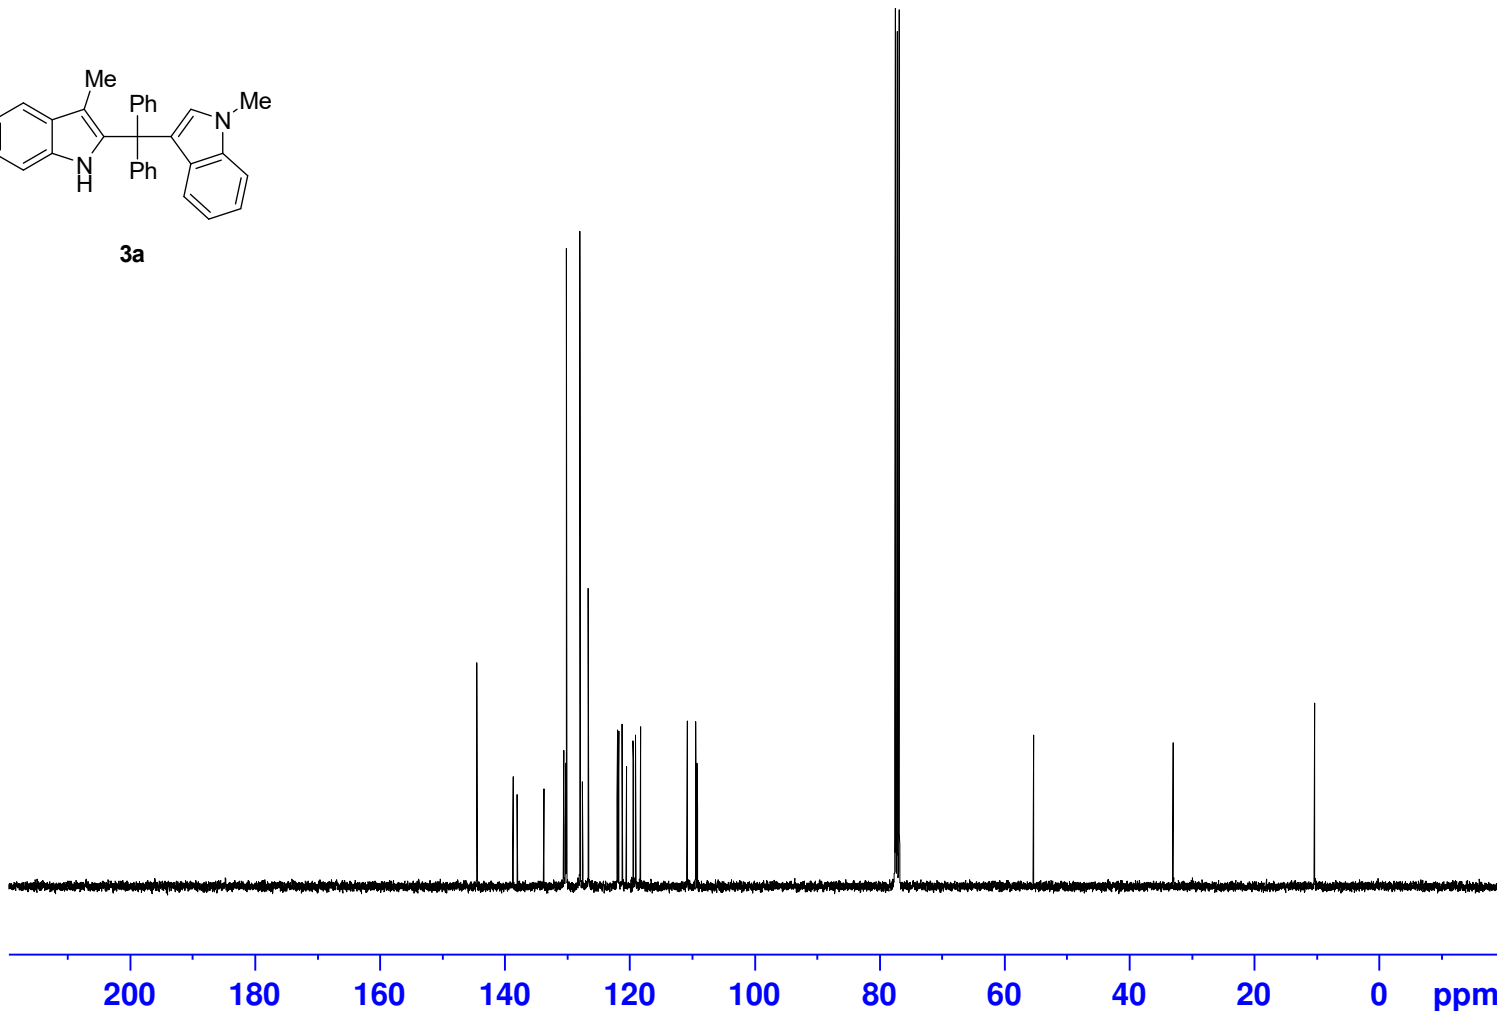

Current Data Parameters  
NAME 20231021-400M  
EXPNO 29  
PROCNO 1

F2 - Acquisition Parameters  
Date\_ 20231021  
Time 0.06  
INSTRUM spect  
PROBHD 5 mm PADUL 13C  
PULPROG zgpg30  
TD 65536  
SOLVENT CDC13  
NS 400  
DS 4  
SWH 24038.461 Hz  
FIDRES 0.366798 Hz  
AQ 1.3631488 sec  
RG 35.06  
DW 20.800 usec  
DE 6.50 usec  
TE 294.5 K  
D1 2.00000000 sec  
D11 0.03000000 sec  
TD0 1

==== CHANNEL f1 =====  
NUC1 13C  
P1 9.80 usec  
PLW1 47.40000153 W  
SFO1 100.6379178 MHz

==== CHANNEL f2 =====  
CPDPRG[2] waltz16  
NUC2 1H  
PCPD2 90.00 usec  
PLW2 23.00000000 W  
PLW12 0.30712000 W  
PLW13 0.24877000 W  
SFO2 400.1916008 MHz

F2 - Processing parameters  
SI 32768  
SF 100.6278499 MHz  
WDW EM  
SSB 0  
LB 1.00 Hz  
GB 0  
PC 1.40

ncc-2-42



Current Data Parameters  
NAME 20230831-400M  
EXPNO 17  
PROCNO 1

F2 - Acquisition Parameters  
Date\_ 20230831  
Time 4.02  
INSTRUM spect  
PROBHD 5 mm PADUL 13C  
PULPROG zg30  
TD 65536  
SOLVENT CDC13  
NS 6  
DS 2  
SWH 8223.685 Hz  
FIDRES 0.125483 Hz  
AQ 3.9845889 sec  
RG 100.49  
DW 60.800 usec  
DE 6.50 usec  
TE 292.5 K  
D1 1.00000000 sec  
TD0 1

==== CHANNEL f1 =====  
NUC1 1H  
P1 9.90 usec  
PLW1 23.00000000 W  
SFO1 400.1924713 MHz

F2 - Processing parameters  
SI 65536  
SF 400.1900139 MHz  
WDW EM  
SSB 0  
LB 0.30 Hz  
GB 0  
PC 1.00

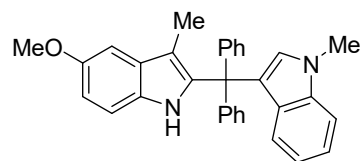

3b

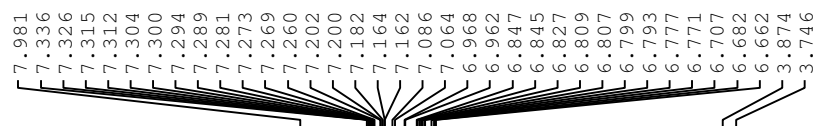

1.621

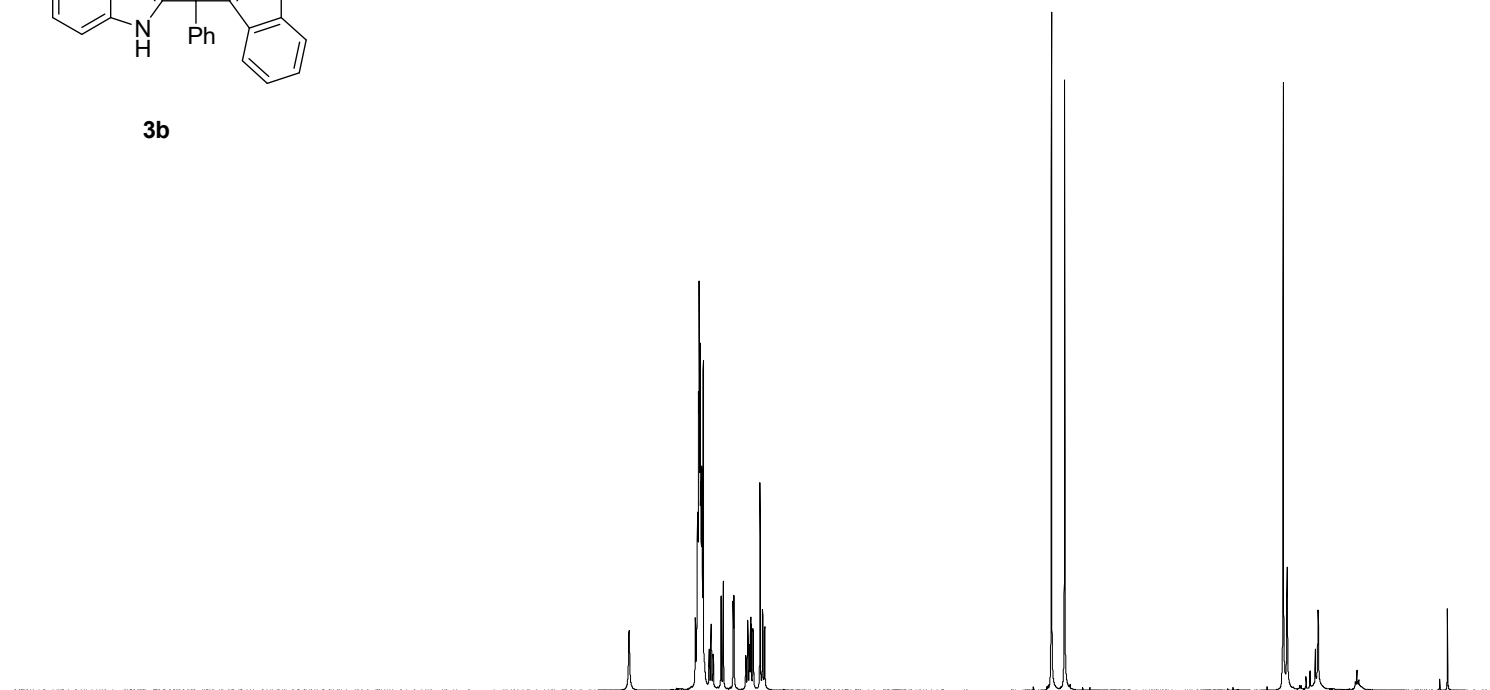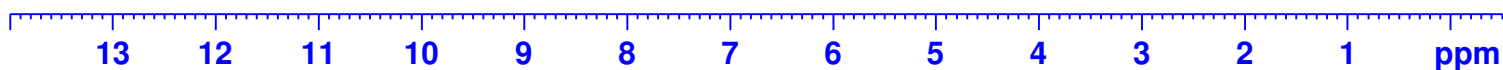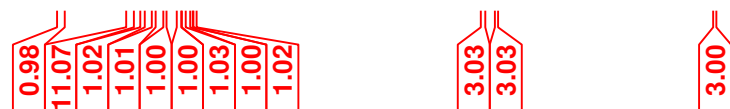

ncc-2-42



Current Data Parameters  
NAME 20230831-400M  
EXPNO 18  
PROCNO 1

F2 - Acquisition Parameters  
Date\_ 20230831  
Time 4.32  
INSTRUM spect  
PROBHD 5 mm PADUL 13C  
PULPROG zgpg30  
TD 65536  
SOLVENT CDC13  
NS 500  
DS 4  
SWH 24038.461 Hz  
FIDRES 0.366798 Hz  
AQ 1.3631488 sec  
RG 37.77  
DW 20.800 usec  
DE 6.50 usec  
TE 293.0 K  
D1 2.00000000 sec  
D11 0.03000000 sec  
TD0 1

=====  
CHANNEL f1  
NUC1 13C  
P1 9.80 usec  
PLW1 47.40000153 W  
SFO1 100.6379178 MHz

=====  
CHANNEL f2  
CPDPRG[2] waltz16  
NUC2 1H  
PCPD2 90.00 usec  
PLW2 23.00000000 W  
PLW12 0.30712000 W  
PLW13 0.24877000 W  
SFO2 400.1916008 MHz

F2 - Processing parameters  
SI 32768  
SF 100.6278484 MHz  
WDW EM  
SSB 0  
LB 1.00 Hz  
GB 0  
PC 1.40

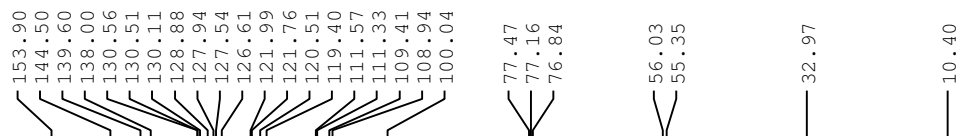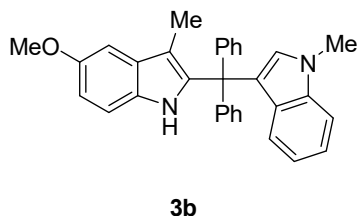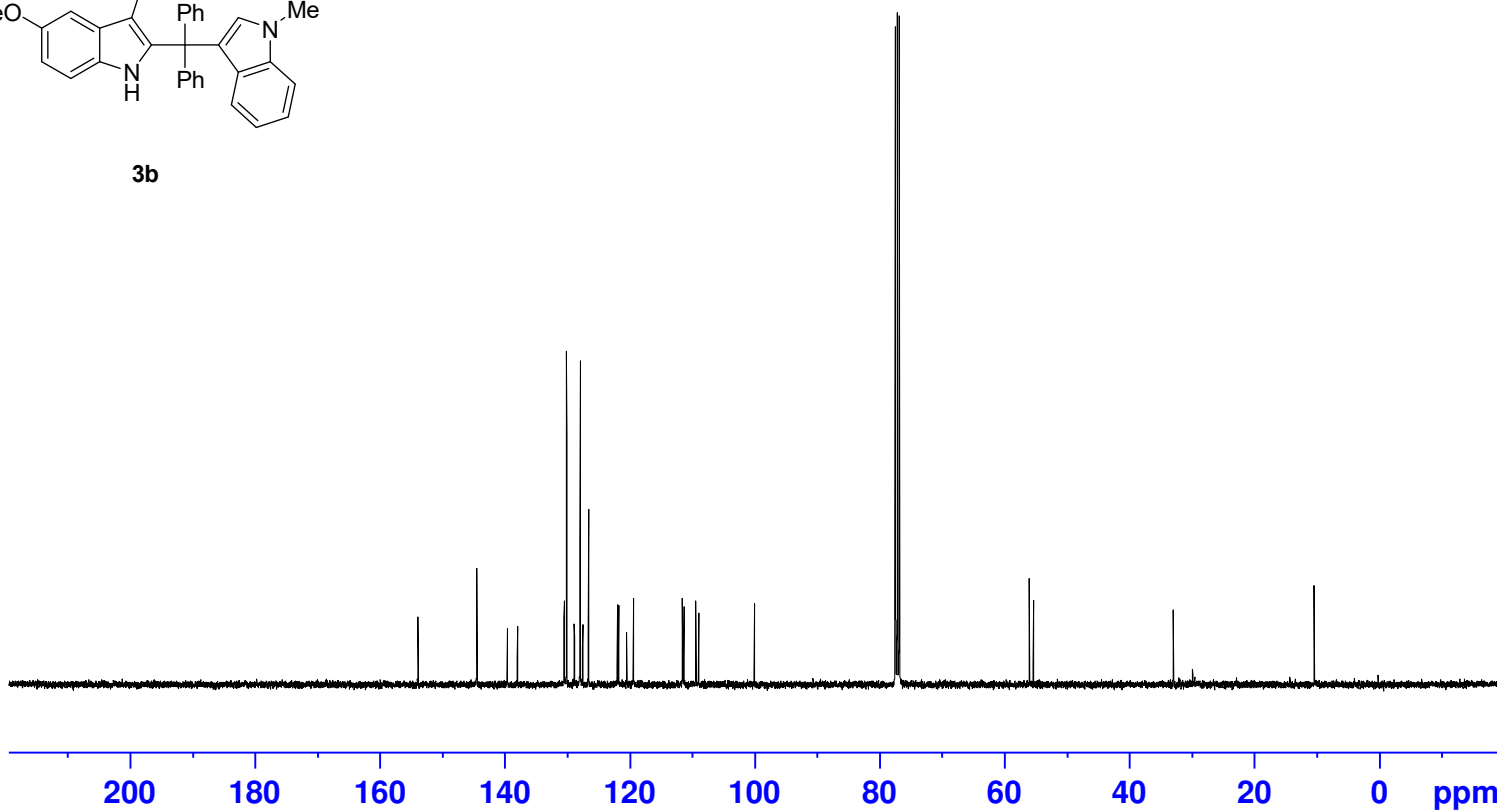

ncc-2-44

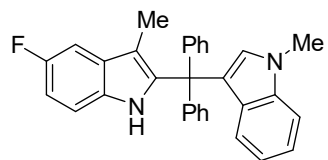

3c

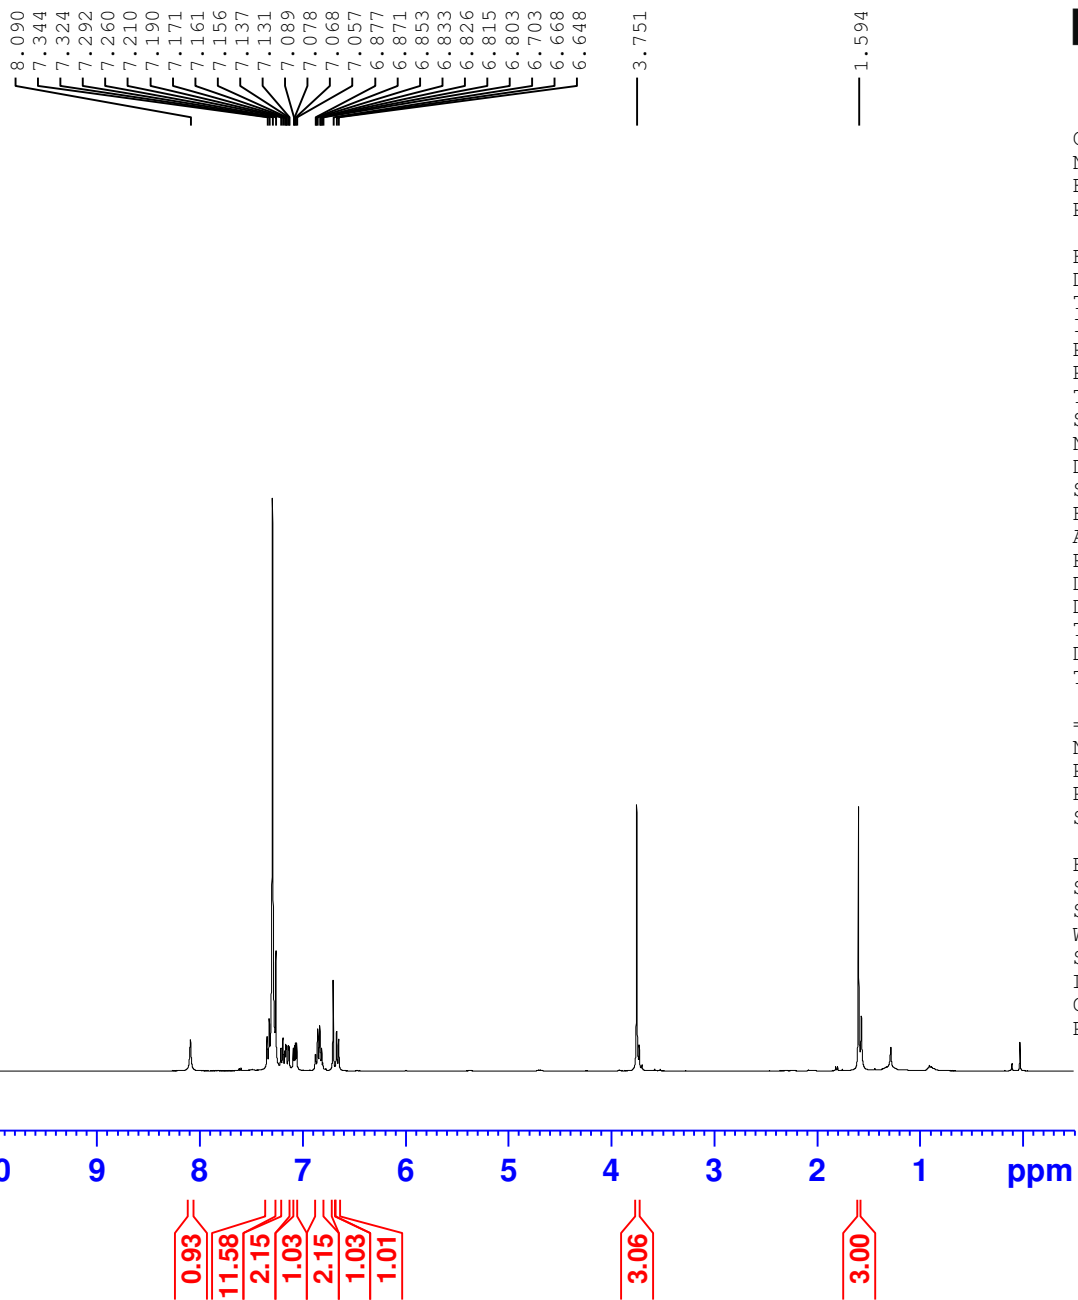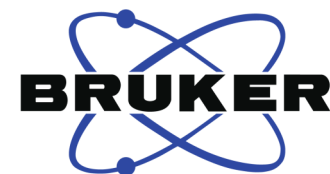

Current Data Parameters  
NAME 20230901-400M  
EXPNO 10  
PROCNO 1

F2 - Acquisition Parameters  
Date\_ 20230831  
Time 21.55  
INSTRUM spect  
PROBHD 5 mm PADUL 13C  
PULPROG zg30  
TD 65536  
SOLVENT CDCl3  
NS 6  
DS 2  
SWH 8223.685 Hz  
FIDRES 0.125483 Hz  
AQ 3.9845889 sec  
RG 100.49  
DW 60.800 usec  
DE 6.50 usec  
TE 292.1 K  
D1 1.00000000 sec  
TD0 1

==== CHANNEL f1 =====  
NUC1 1H  
P1 9.90 usec  
PLW1 23.00000000 W  
SFO1 400.1924713 MHz

F2 - Processing parameters  
SI 65536  
SF 400.1900139 MHz  
WDW EM  
SSB 0  
LB 0.30 Hz  
GB 0  
PC 1.00



ncc-2-44

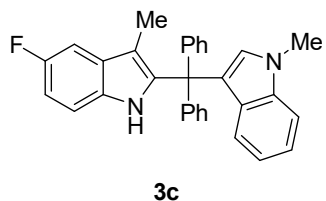

158.97  
156.65  
144.28  
140.64  
138.02  
130.70  
130.61  
130.54  
130.20  
130.06  
128.03  
127.47  
126.73  
121.85  
120.31  
119.49  
111.42  
111.32  
109.50  
109.45  
109.26  
103.20  
102.97  
77.48  
77.16  
76.84

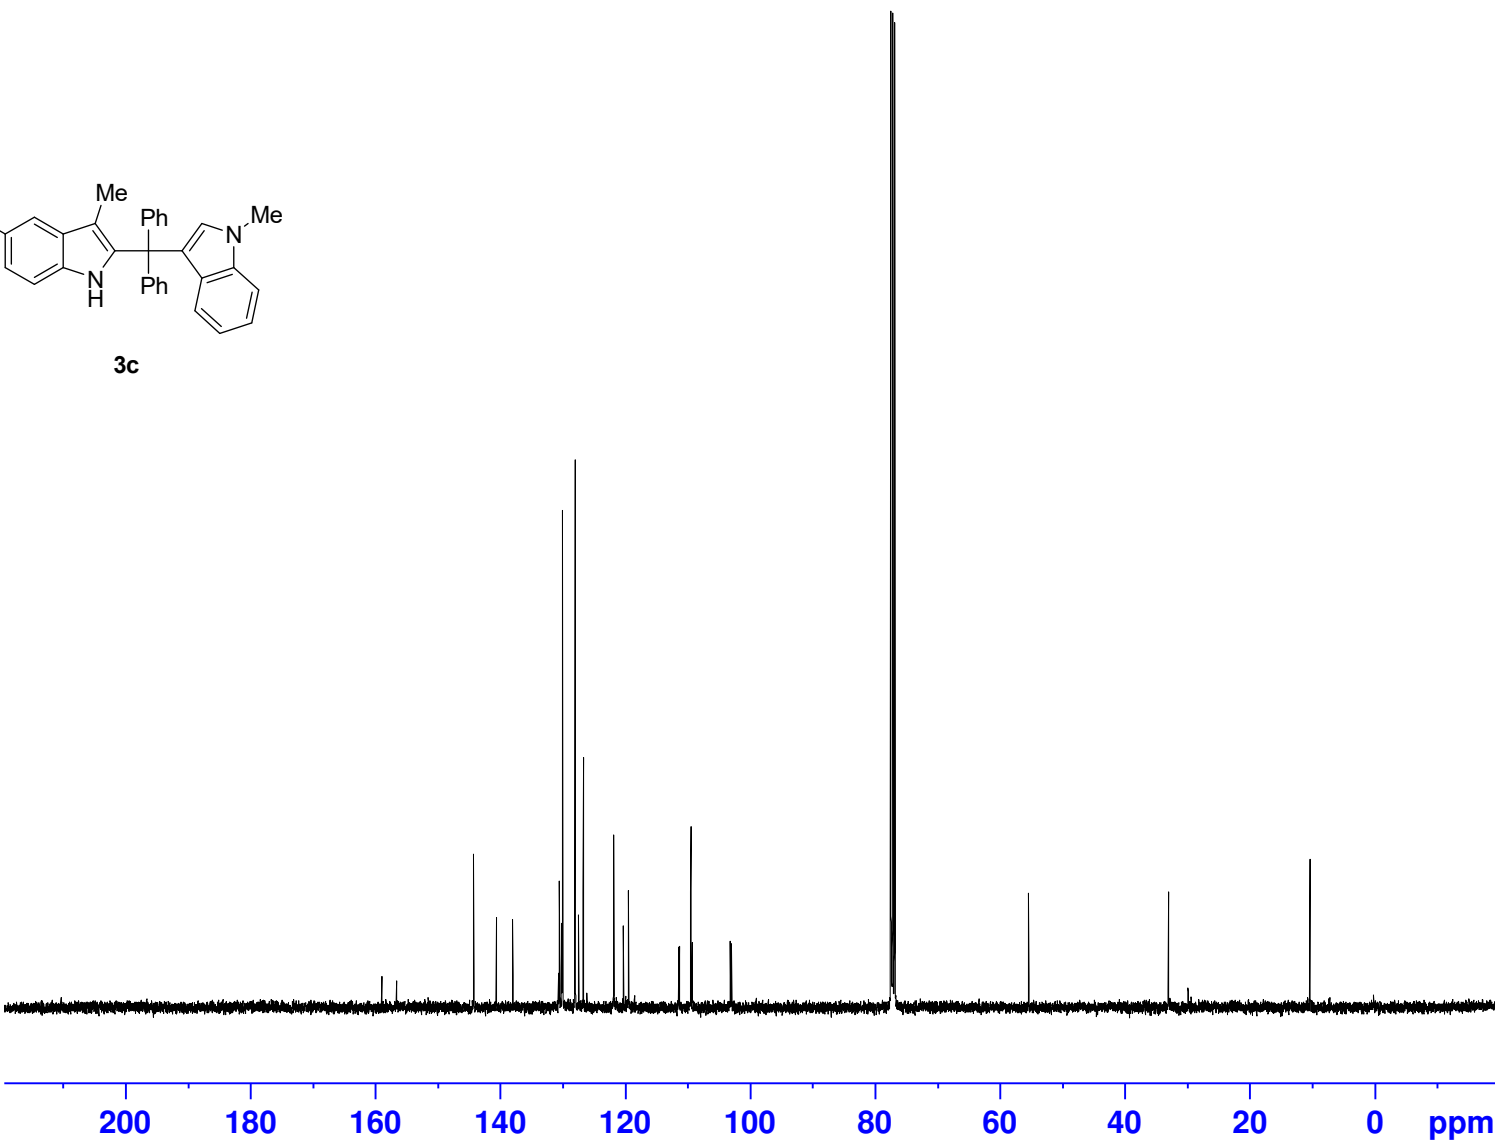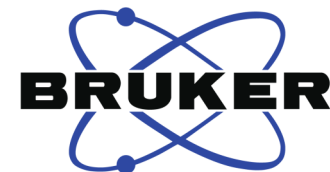

Current Data Parameters  
NAME 20230901-400M  
EXPNO 11  
PROCNO 1

F2 - Acquisition Parameters  
Date\_ 20230831  
Time 22.19  
INSTRUM spect  
PROBHD 5 mm PADUL 13C  
PULPROG zgpg30  
TD 65536  
SOLVENT CDC13  
NS 400  
DS 4  
SWH 24038.461 Hz  
FIDRES 0.366798 Hz  
AQ 1.3631488 sec  
RG 35.06  
DW 20.800 usec  
DE 6.50 usec  
TE 292.7 K  
D1 2.00000000 sec  
D11 0.03000000 sec  
TD0 1

==== CHANNEL f1 =====  
NUC1 13C  
P1 9.80 usec  
PLW1 47.40000153 W  
SFO1 100.6379178 MHz

==== CHANNEL f2 =====  
CPDPRG[2] waltz16  
NUC2 1H  
PCPD2 90.00 usec  
PLW2 23.00000000 W  
PLW12 0.30712000 W  
PLW13 0.24877000 W  
SFO2 400.1916008 MHz

F2 - Processing parameters  
SI 32768  
SF 100.6278477 MHz  
WDW EM  
SSB 0  
LB 1.00 Hz  
GB 0  
PC 1.40

ncc-2-44

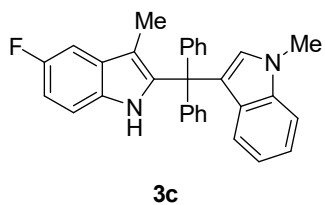

— -125.18



Current Data Parameters  
NAME 20230901-300M  
EXPNO 466  
PROCNO 1

F2 - Acquisition Parameters  
Date\_ 20230901  
Time 13.36  
INSTRUM spect  
PROBHD 5 mm PABBO BB-  
PULPROG zgfhigqn.2  
TD 131072  
SOLVENT CDCl3  
NS 16  
DS 4  
SWH 66964.289 Hz  
FIDRES 0.510897 Hz  
AQ 0.9786710 sec  
RG 203  
DW 7.467 usec  
DE 6.50 usec  
TE 296.0 K  
D1 1.00000000 sec  
D11 0.03000000 sec  
D12 0.00002000 sec  
TD0 1

==== CHANNEL f1 =====  
SFO1 282.3761148 MHz  
NUC1 19F  
P1 14.50 usec  
PLW1 10.39999962 W

==== CHANNEL f2 =====  
SFO2 300.1312005 MHz  
NUC2 1H  
CPDPRG[2] waltz16  
PCPD2 90.00 usec  
PLW2 14.00000000 W  
PLW12 0.17284000 W

F2 - Processing parameters  
SI 65536  
SF 282.4043552 MHz  
WDW EM  
SSB 0  
LB 0.30 Hz  
GB 0  
PC 1.00

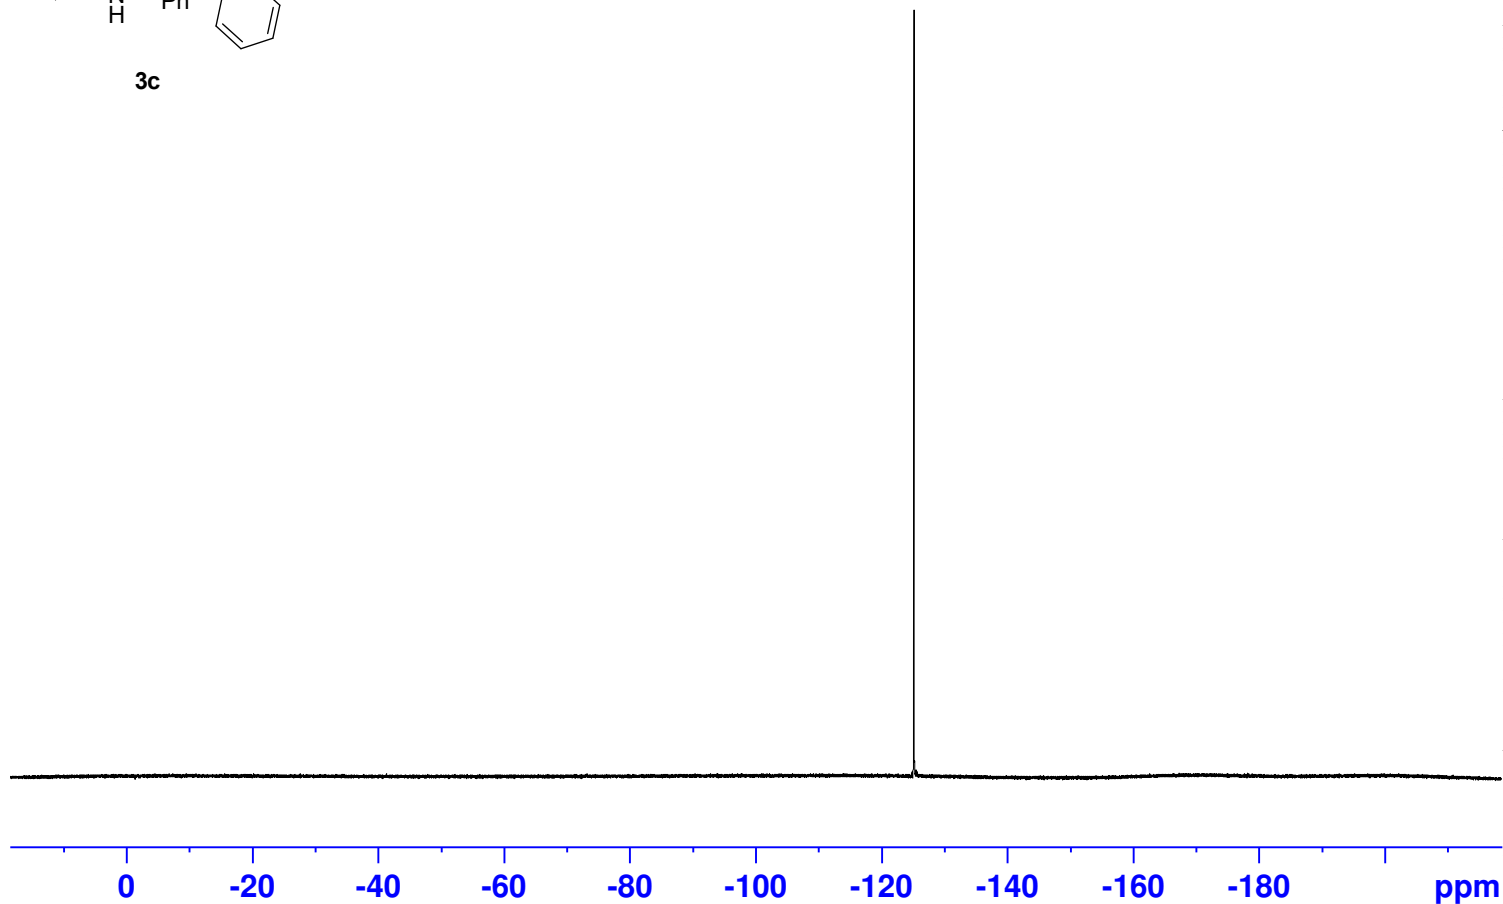

ncc-2-46

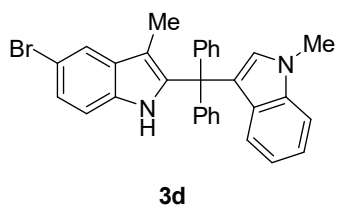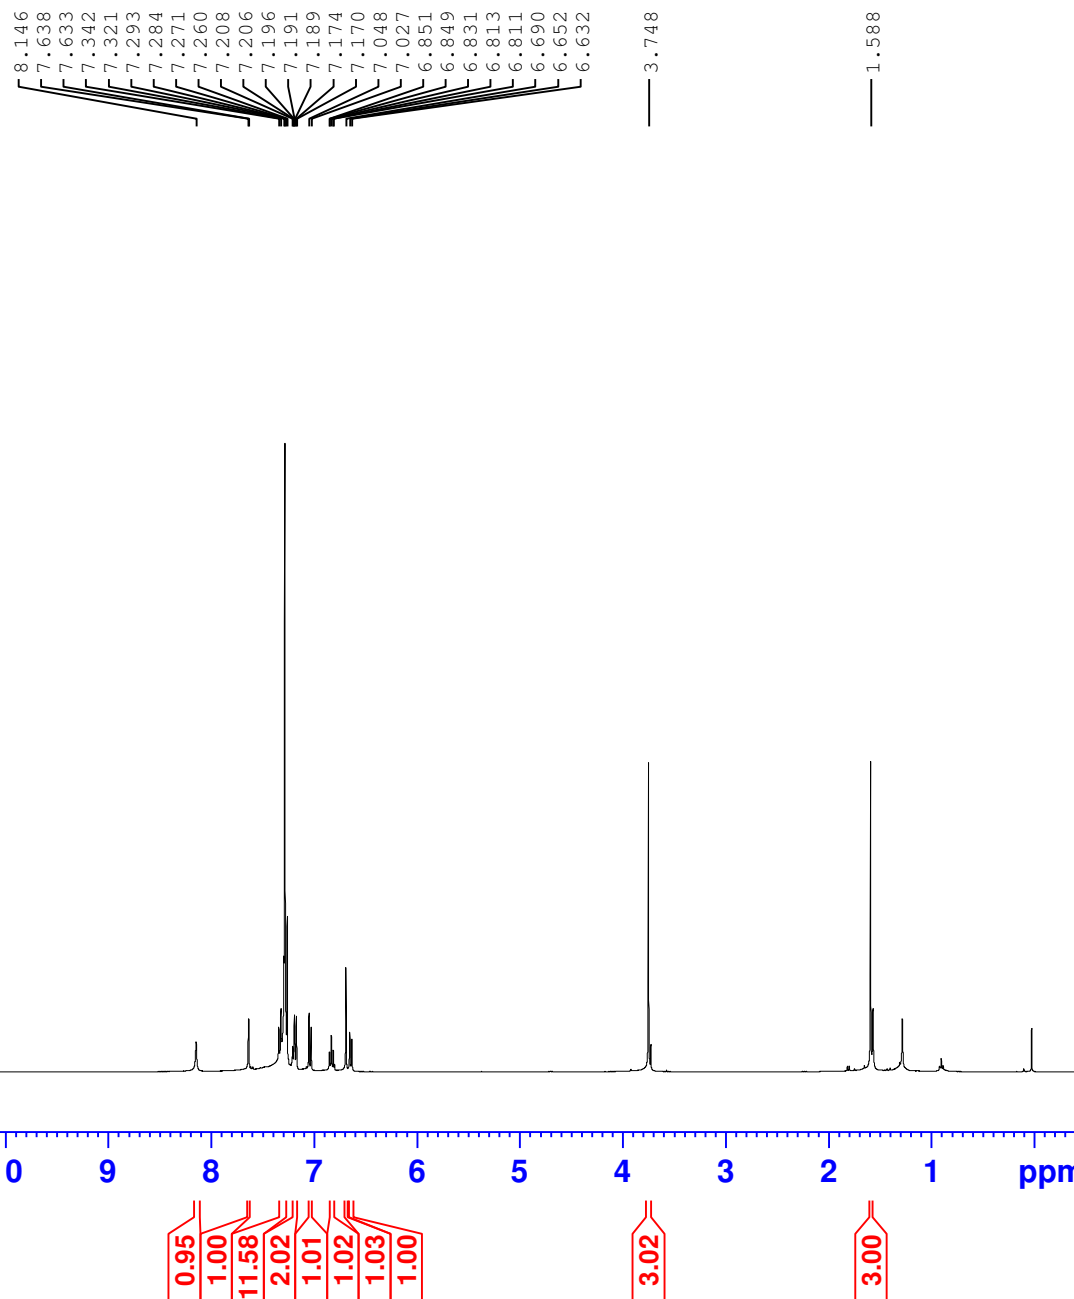

Current Data Parameters  
NAME 20230831-400M  
EXPNO 26  
PROCNO 1

F2 - Acquisition Parameters  
Date\_ 20230831  
Time 7.27  
INSTRUM spect  
PROBHD 5 mm PADUL 13C  
PULPROG zg30  
TD 65536  
SOLVENT CDC13  
NS 6  
DS 2  
SWH 8223.685 Hz  
FIDRES 0.125483 Hz  
AQ 3.9845889 sec  
RG 100.49  
DW 60.800 usec  
DE 6.50 usec  
TE 292.6 K  
D1 1.00000000 sec  
TD0 1

==== CHANNEL f1 =====  
NUC1 1H  
P1 9.90 usec  
PLW1 23.00000000 W  
SFO1 400.1924713 MHz

F2 - Processing parameters  
SI 65536  
SF 400.1900139 MHz  
WDW EM  
SSB 0  
LB 0.30 Hz  
GB 0  
PC 1.00

ncc-2-46



Current Data Parameters  
NAME 20230831-400M  
EXPNO 27  
PROCNO 1

F2 - Acquisition Parameters  
Date\_ 20230831  
Time 7.57  
INSTRUM spect  
PROBHD 5 mm PADUL 13C  
PULPROG zgpg30  
TD 65536  
SOLVENT CDC13  
NS 500  
DS 4  
SWH 24038.461 Hz  
FIDRES 0.366798 Hz  
AQ 1.3631488 sec  
RG 37.77  
DW 20.800 usec  
DE 6.50 usec  
TE 293.1 K  
D1 2.00000000 sec  
D11 0.03000000 sec  
TD0 1

=====  
CHANNEL f1  
NUC1 13C  
P1 9.80 usec  
PLW1 47.40000153 W  
SFO1 100.6379178 MHz

=====  
CHANNEL f2  
CPDPRG[2] waltz16  
NUC2 1H  
PCPD2 90.00 usec  
PLW2 23.00000000 W  
PLW12 0.30712000 W  
PLW13 0.24877000 W  
SFO2 400.1916008 MHz

F2 - Processing parameters  
SI 32768  
SF 100.6278477 MHz  
WDW EM  
SSB 0  
LB 1.00 Hz  
GB 0  
PC 1.40

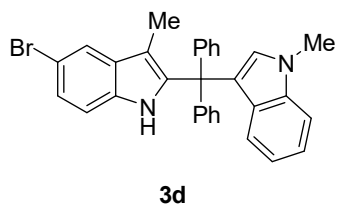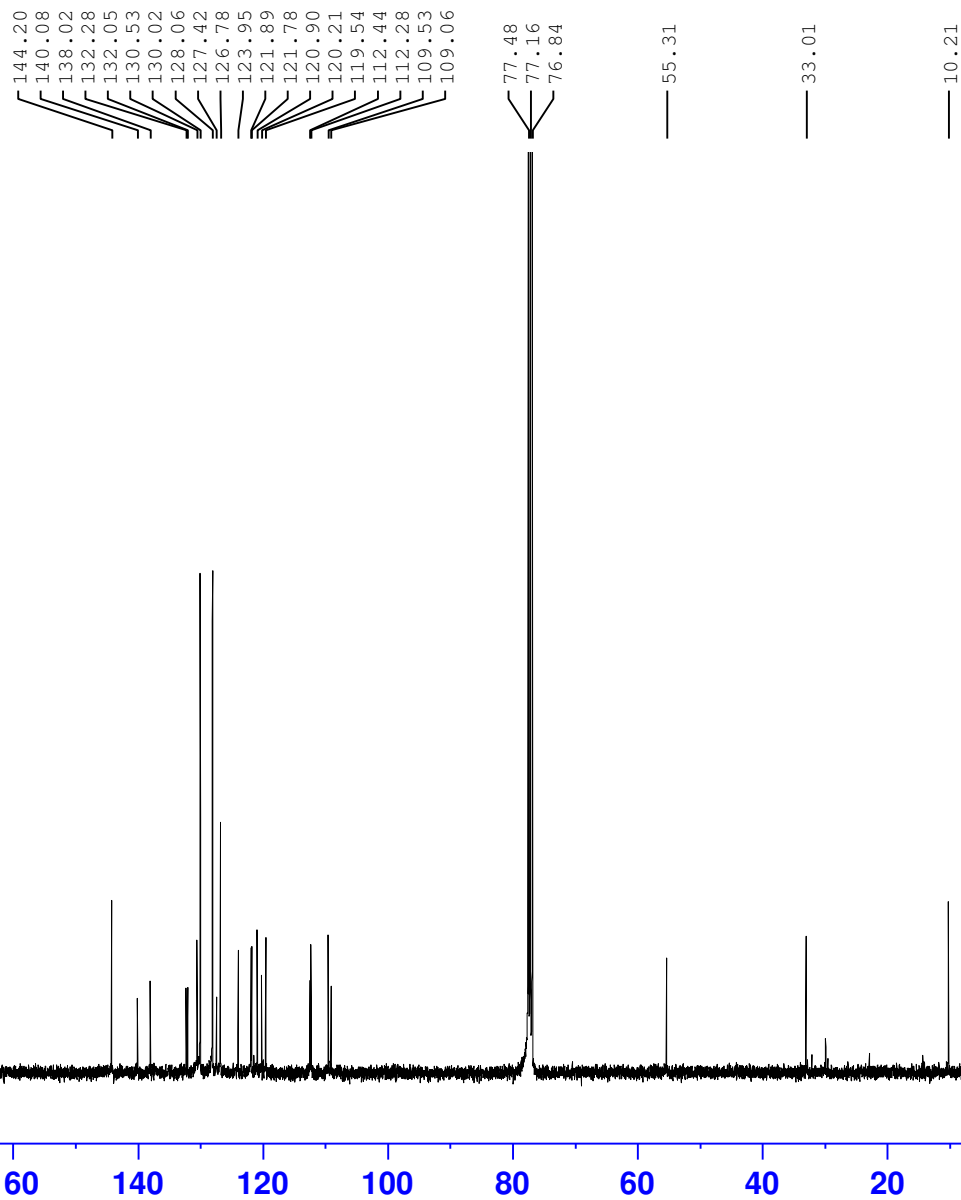

ncc-2-41

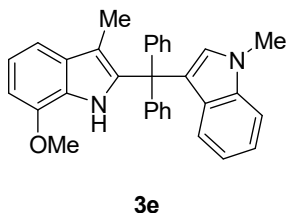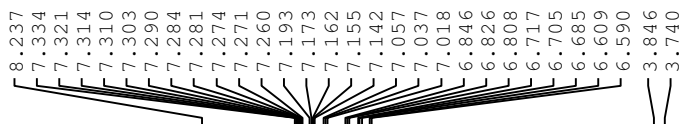

1.634



Current Data Parameters  
NAME 20230831-400M  
EXPNO 15  
PROCNO 1

F2 - Acquisition Parameters  
Date\_ 20230831  
Time 3.27  
INSTRUM spect  
PROBHD 5 mm PADUL 13C  
PULPROG zg30  
TD 65536  
SOLVENT CDC13  
NS 6  
DS 2  
SWH 8223.685 Hz  
FIDRES 0.125483 Hz  
AQ 3.9845889 sec  
RG 90.23  
DW 60.800 usec  
DE 6.50 usec  
TE 292.3 K  
D1 1.00000000 sec  
TD0 1

==== CHANNEL f1 =====  
NUC1 1H  
P1 9.90 usec  
PLW1 23.00000000 W  
SFO1 400.1924713 MHz

F2 - Processing parameters  
SI 65536  
SF 400.1900138 MHz  
WDW EM  
SSB 0  
LB 0.30 Hz  
GB 0  
PC 1.00

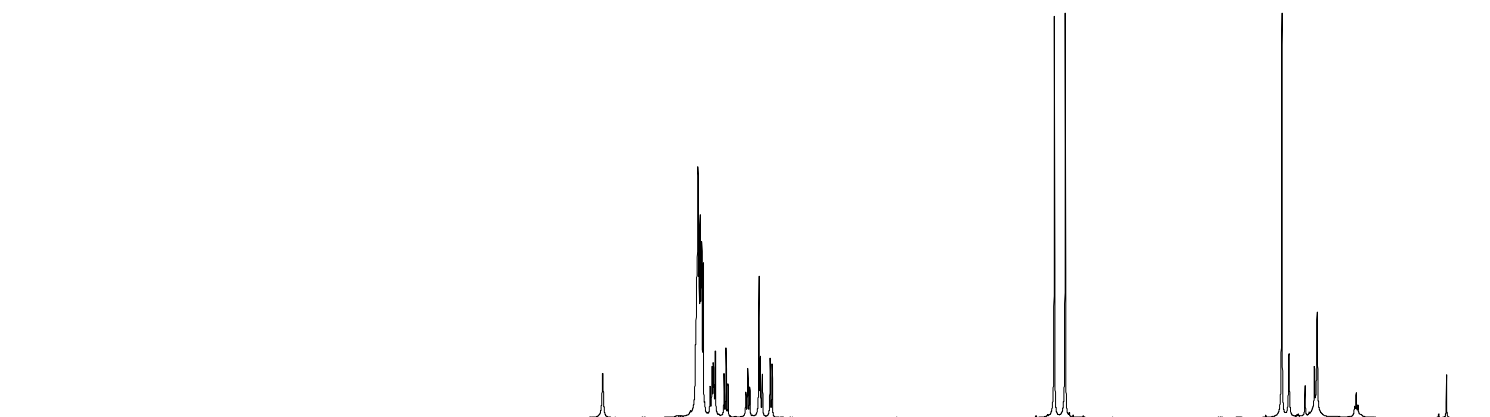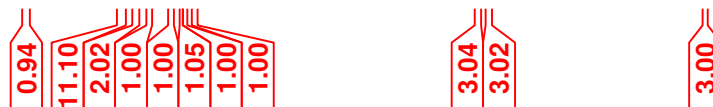

ncc-2-41

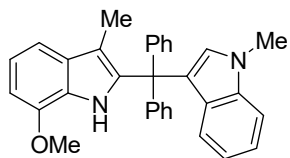

3e

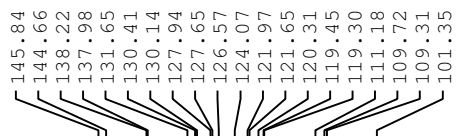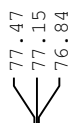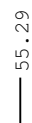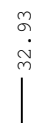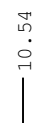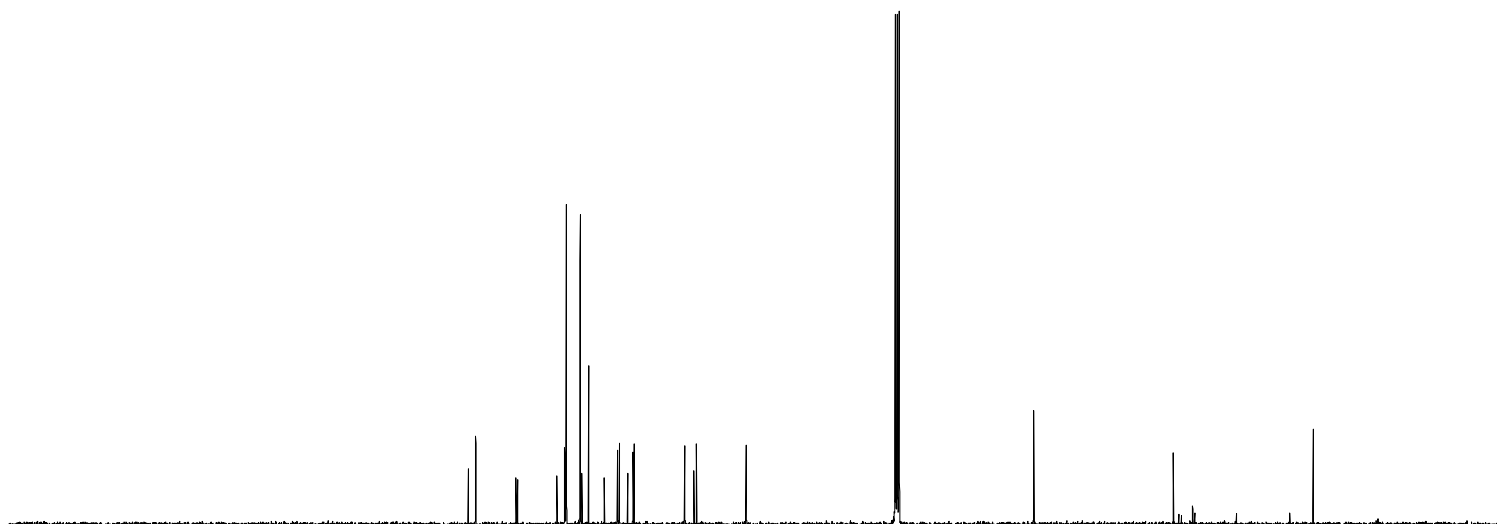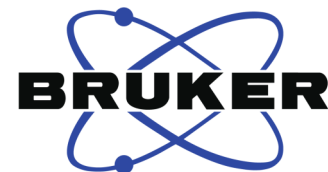

Current Data Parameters  
NAME 20230831-400M  
EXPNO 16  
PROCNO 1

F2 - Acquisition Parameters  
Date\_ 20230831  
Time 3.57  
INSTRUM spect  
PROBHD 5 mm PADUL 13C  
PULPROG zgpg30  
TD 65536  
SOLVENT CDCl3  
NS 500  
DS 4  
SWH 24038.461 Hz  
FIDRES 0.366798 Hz  
AQ 1.3631488 sec  
RG 37.77  
DW 20.800 usec  
DE 6.50 usec  
TE 293.1 K  
D1 2.00000000 sec  
D11 0.03000000 sec  
TD0 1

==== CHANNEL f1 =====  
NUC1 13C  
P1 9.80 usec  
PLW1 47.40000153 W  
SFO1 100.6379178 MHz

==== CHANNEL f2 =====  
CPDPRG[2] waltz16  
NUC2 1H  
PCPD2 90.00 usec  
PLW2 23.00000000 W  
PLW12 0.30712000 W  
PLW13 0.24877000 W  
SFO2 400.1916008 MHz

F2 - Processing parameters  
SI 32768  
SF 100.6278491 MHz  
WDW EM  
SSB 0  
LB 1.00 Hz  
GB 0  
PC 1.40

200 180 160 140 120 100 80 60 40 20 0 ppm

ncc-2-43

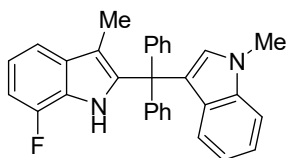

3f

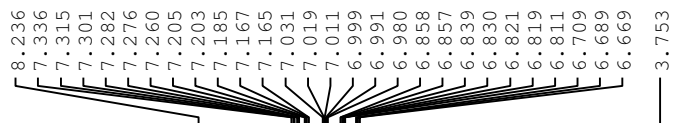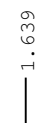

Current Data Parameters  
NAME 20230831-400M  
EXPNO 19  
PROCNO 1

F2 - Acquisition Parameters  
Date\_ 20230831  
Time 4.36  
INSTRUM spect  
PROBHD 5 mm PADUL 13C  
PULPROG zg30  
TD 65536  
SOLVENT CDC13  
NS 6  
DS 2  
SWH 8223.685 Hz  
FIDRES 0.125483 Hz  
AQ 3.9845889 sec  
RG 100.49  
DW 60.800 usec  
DE 6.50 usec  
TE 292.5 K  
D1 1.00000000 sec  
TD0 1

==== CHANNEL f1 =====  
NUC1 1H  
P1 9.90 usec  
PLW1 23.00000000 W  
SFO1 400.1924713 MHz

F2 - Processing parameters  
SI 65536  
SF 400.1900138 MHz  
WDW EM  
SSB 0  
LB 0.30 Hz  
GB 0  
PC 1.00

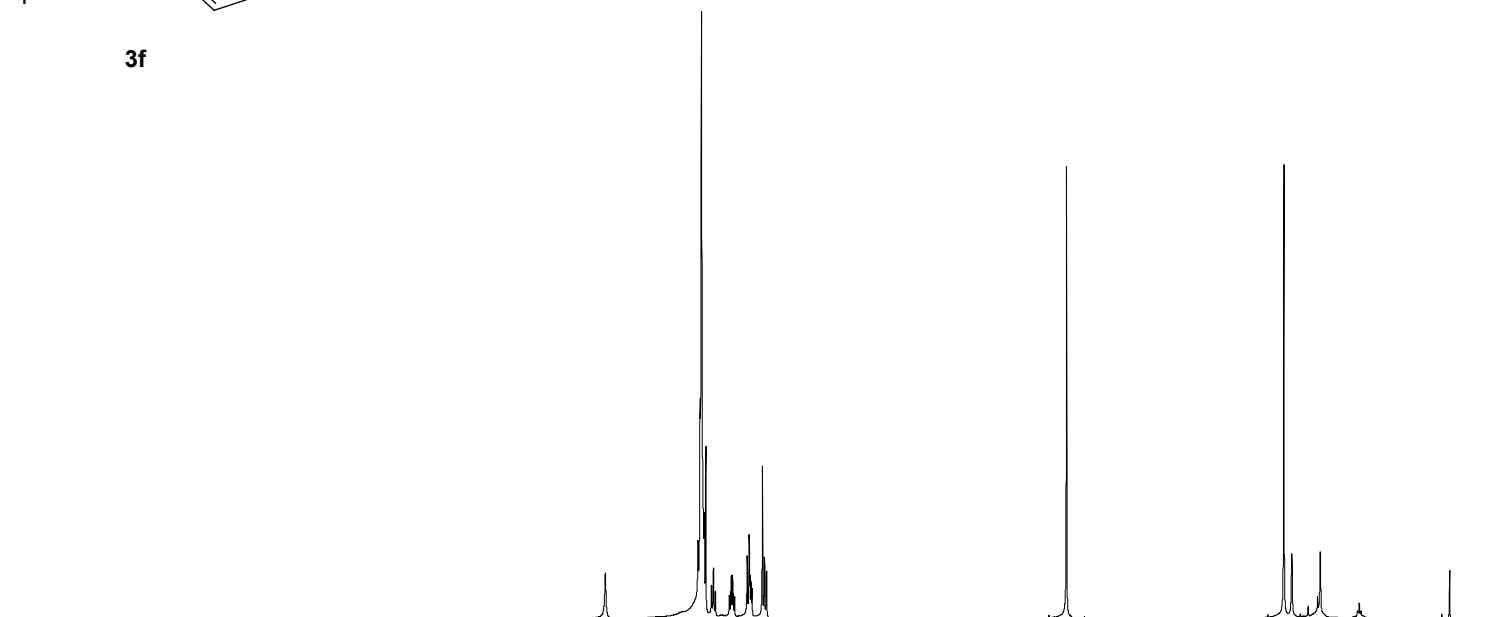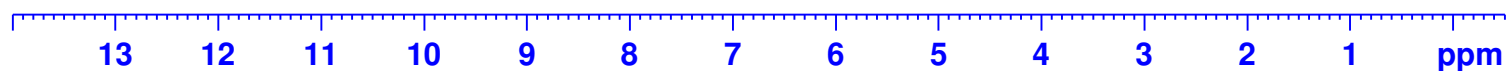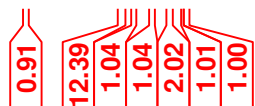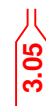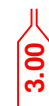

ncc-2-43

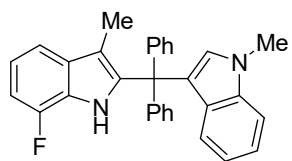

3f

150.49  
148.07  
144.27  
139.50  
138.01  
134.07  
134.01  
130.42  
130.05  
128.06  
127.43  
126.76  
122.00  
121.89  
121.77  
120.11  
119.52  
119.27  
119.21  
114.11  
114.07  
110.18  
109.49  
106.24  
106.08  
77.47  
77.16  
76.84

55.32

32.98

10.51

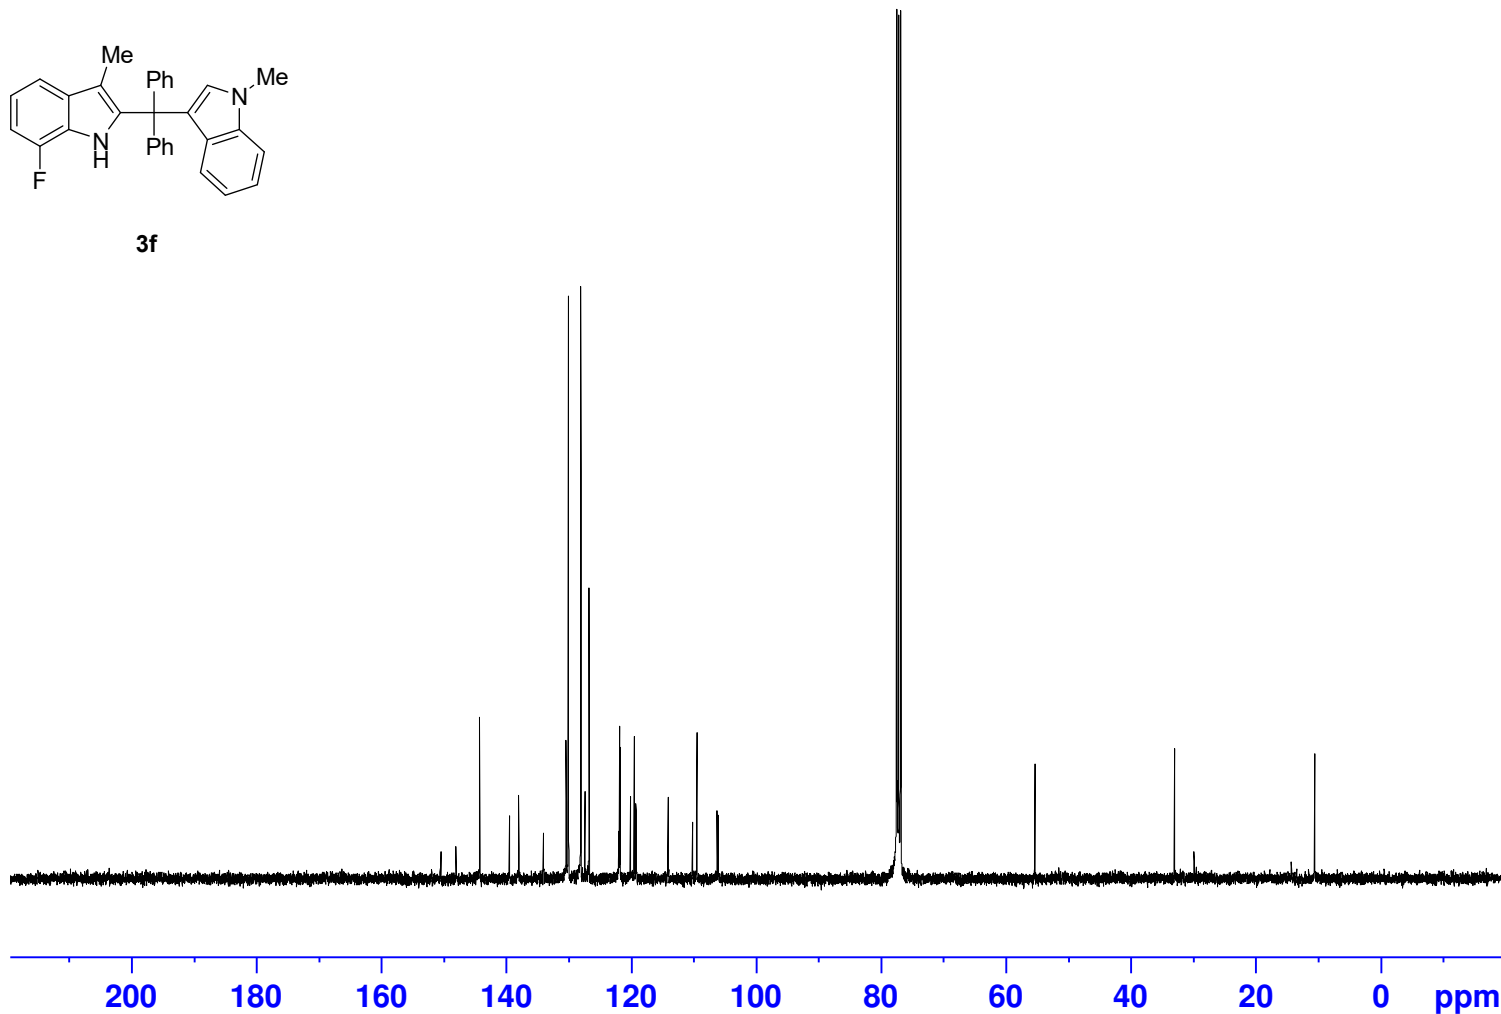

Current Data Parameters  
NAME 20230831-400M  
EXPNO 20  
PROCNO 1

F2 - Acquisition Parameters  
Date\_ 20230831  
Time 5.05  
INSTRUM spect  
PROBHD 5 mm PADUL 13C  
PULPROG zgpg30  
TD 65536  
SOLVENT CDC13  
NS 500  
DS 4  
SWH 24038.461 Hz  
FIDRES 0.366798 Hz  
AQ 1.3631488 sec  
RG 37.77  
DW 20.800 usec  
DE 6.50 usec  
TE 292.9 K  
D1 2.00000000 sec  
D11 0.03000000 sec  
TD0 1

==== CHANNEL f1 =====  
NUC1 13C  
P1 9.80 usec  
PLW1 47.40000153 W  
SFO1 100.6379178 MHz

==== CHANNEL f2 =====  
CPDPRG[2] waltz16  
NUC2 1H  
PCPD2 90.00 usec  
PLW2 23.00000000 W  
PLW12 0.30712000 W  
PLW13 0.24877000 W  
SFO2 400.1916008 MHz

F2 - Processing parameters  
SI 32768  
SF 100.6278481 MHz  
WDW EM  
SSB 0  
LB 1.00 Hz  
GB 0  
PC 1.40



ncc-2-43

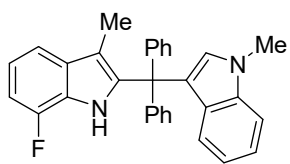

3f

-135.82

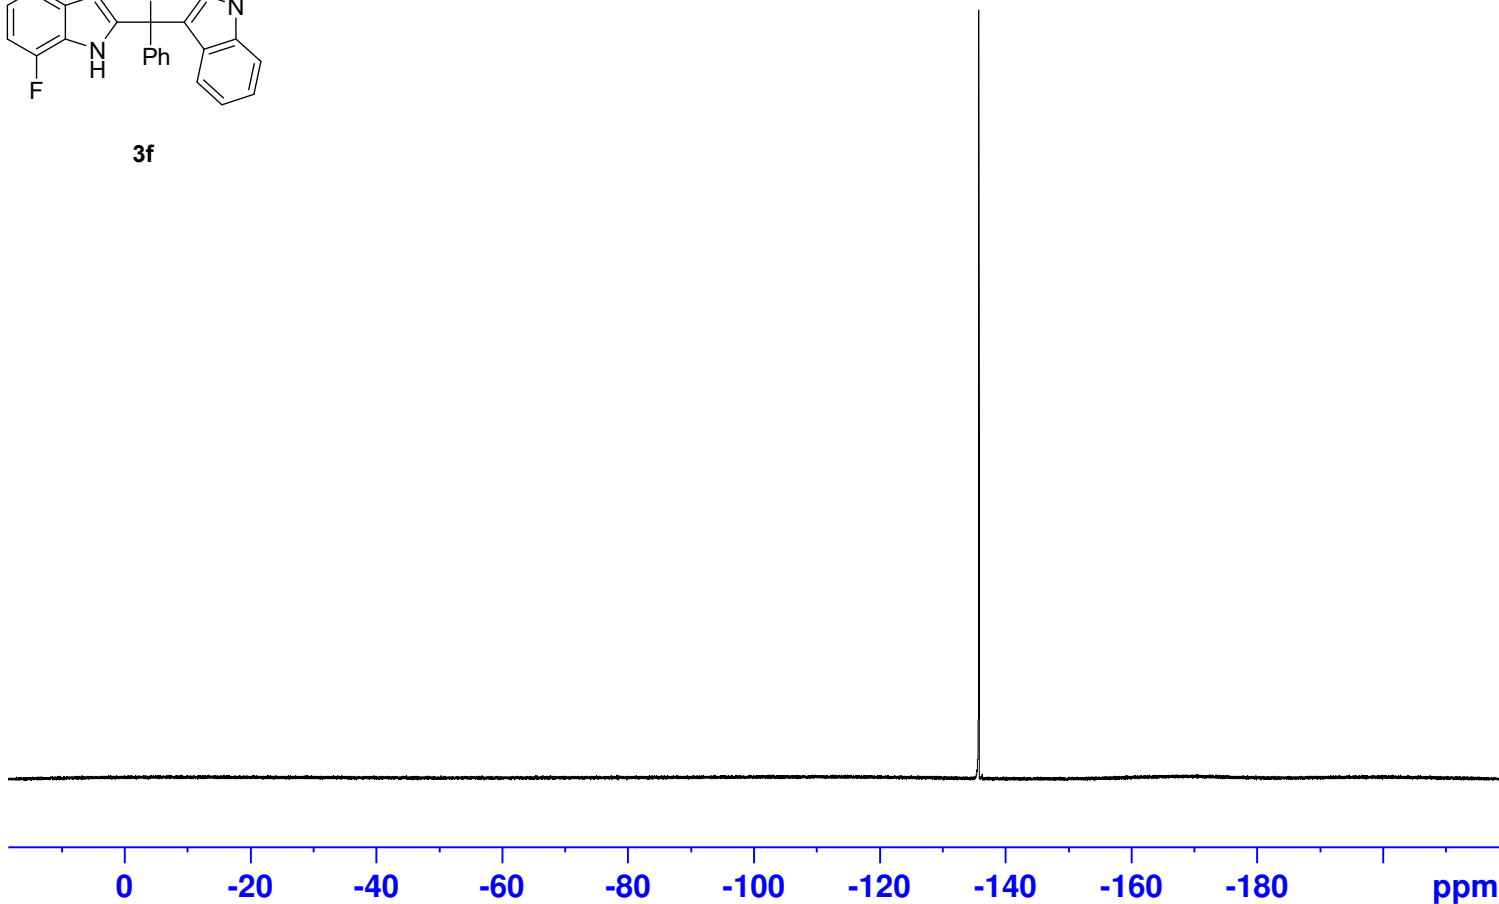

Current Data Parameters  
NAME 20230831-300M  
EXPNO 460  
PROCNO 1

F2 - Acquisition Parameters  
Date\_ 20230831  
Time 11.46  
INSTRUM spect  
PROBHD 5 mm PABBO BB-  
PULPROG zgfhigqn.2  
TD 131072  
SOLVENT CDCl3  
NS 16  
DS 4  
SWH 66964.289 Hz  
FIDRES 0.510897 Hz  
AQ 0.9786710 sec  
RG 203  
DW 7.467 usec  
DE 6.50 usec  
TE 295.6 K  
D1 1.00000000 sec  
D11 0.03000000 sec  
D12 0.00002000 sec  
TD0 1

==== CHANNEL f1 =====  
SFO1 282.3761148 MHz  
NUC1 19F  
P1 14.50 usec  
PLW1 10.39999962 W

==== CHANNEL f2 =====  
SFO2 300.1312005 MHz  
NUC2 1H  
CPDPRG[2] waltz16  
PCPD2 90.00 usec  
PLW2 14.00000000 W  
PLW12 0.17284000 W

F2 - Processing parameters  
SI 65536  
SF 282.4043552 MHz  
WDW EM  
SSB 0  
LB 0.30 Hz  
GB 0  
PC 1.00

ncc-2-45



Current Data Parameters  
NAME 20230901-400M  
EXPNO 12  
PROCNO 1

F2 - Acquisition Parameters  
Date\_ 20230831  
Time 22.24  
INSTRUM spect  
PROBHD 5 mm PADUL 13C  
PULPROG zg30  
TD 65536  
SOLVENT CDC13  
NS 6  
DS 2  
SWH 8223.685 Hz  
FIDRES 0.125483 Hz  
AQ 3.9845889 sec  
RG 113.67  
DW 60.800 usec  
DE 6.50 usec  
TE 292.1 K  
D1 1.00000000 sec  
TD0 1

==== CHANNEL f1 =====  
NUC1 1H  
P1 9.90 usec  
PLW1 23.00000000 W  
SFO1 400.1924713 MHz

F2 - Processing parameters  
SI 65536  
SF 400.1900139 MHz  
WDW EM  
SSB 0  
LB 0.30 Hz  
GB 0  
PC 1.00

8.357  
7.464  
7.445  
7.338  
7.316  
7.298  
7.260  
7.245  
7.212  
7.192  
7.174  
6.994  
6.974  
6.955  
6.884  
6.882  
6.864  
6.846  
6.739  
6.718  
6.677

3.750

1.616

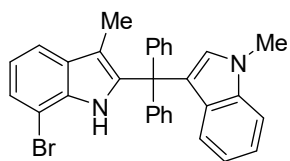

3g

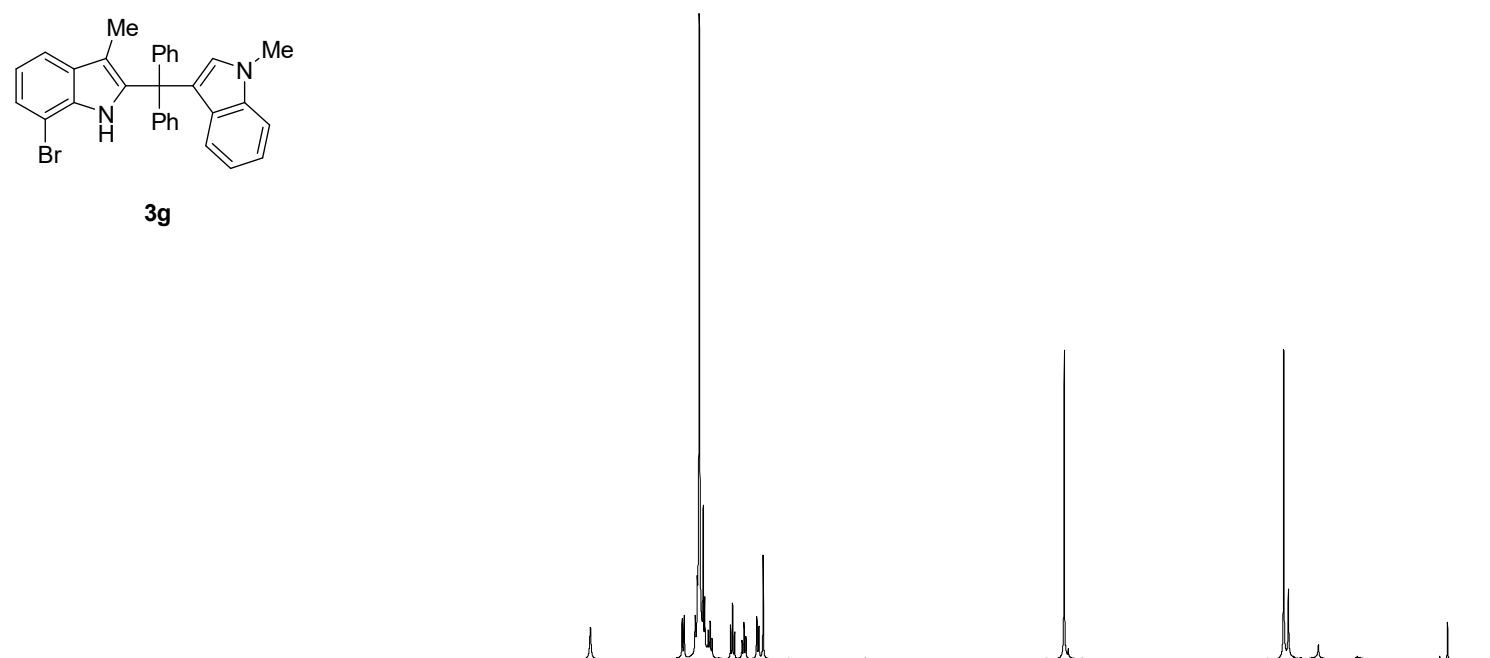

13 12 11 10 9 8 7 6 5 4 3 2 1 ppm

0.99  
1.13  
11.23  
2.31  
1.02  
1.03  
1.03  
1.00  
3.02  
3.00

ncc-2-45



Current Data Parameters  
NAME 20230901-400M  
EXPNO 13  
PROCNO 1

F2 - Acquisition Parameters  
Date\_ 20230831  
Time 22.48  
INSTRUM spect  
PROBHD 5 mm PADUL 13C  
PULPROG zgpg30  
TD 65536  
SOLVENT CDC13  
NS 400  
DS 4  
SWH 24038.461 Hz  
FIDRES 0.366798 Hz  
AQ 1.3631488 sec  
RG 37.77  
DW 20.800 usec  
DE 6.50 usec  
TE 292.9 K  
D1 2.00000000 sec  
D11 0.03000000 sec  
TD0 1

==== CHANNEL f1 =====  
NUC1 13C  
P1 9.80 usec  
PLW1 47.40000153 W  
SFO1 100.6379178 MHz

==== CHANNEL f2 =====  
CPDPRG[2] waltz16  
NUC2 1H  
PCPD2 90.00 usec  
PLW2 23.00000000 W  
PLW12 0.30712000 W  
PLW13 0.24877000 W  
SFO2 400.1916008 MHz

F2 - Processing parameters  
SI 32768  
SF 100.6278477 MHz  
WDW EM  
SSB 0  
LB 1.00 Hz  
GB 0  
PC 1.40

144.23  
139.42  
138.02  
132.54  
131.29  
130.50  
130.02  
128.06  
127.38  
126.80  
123.46  
121.92  
121.85  
120.19  
119.51  
117.52  
110.52  
109.48  
104.42  
77.48  
77.16  
76.84  
55.38  
33.00  
10.52

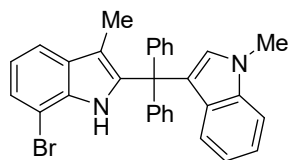

3g

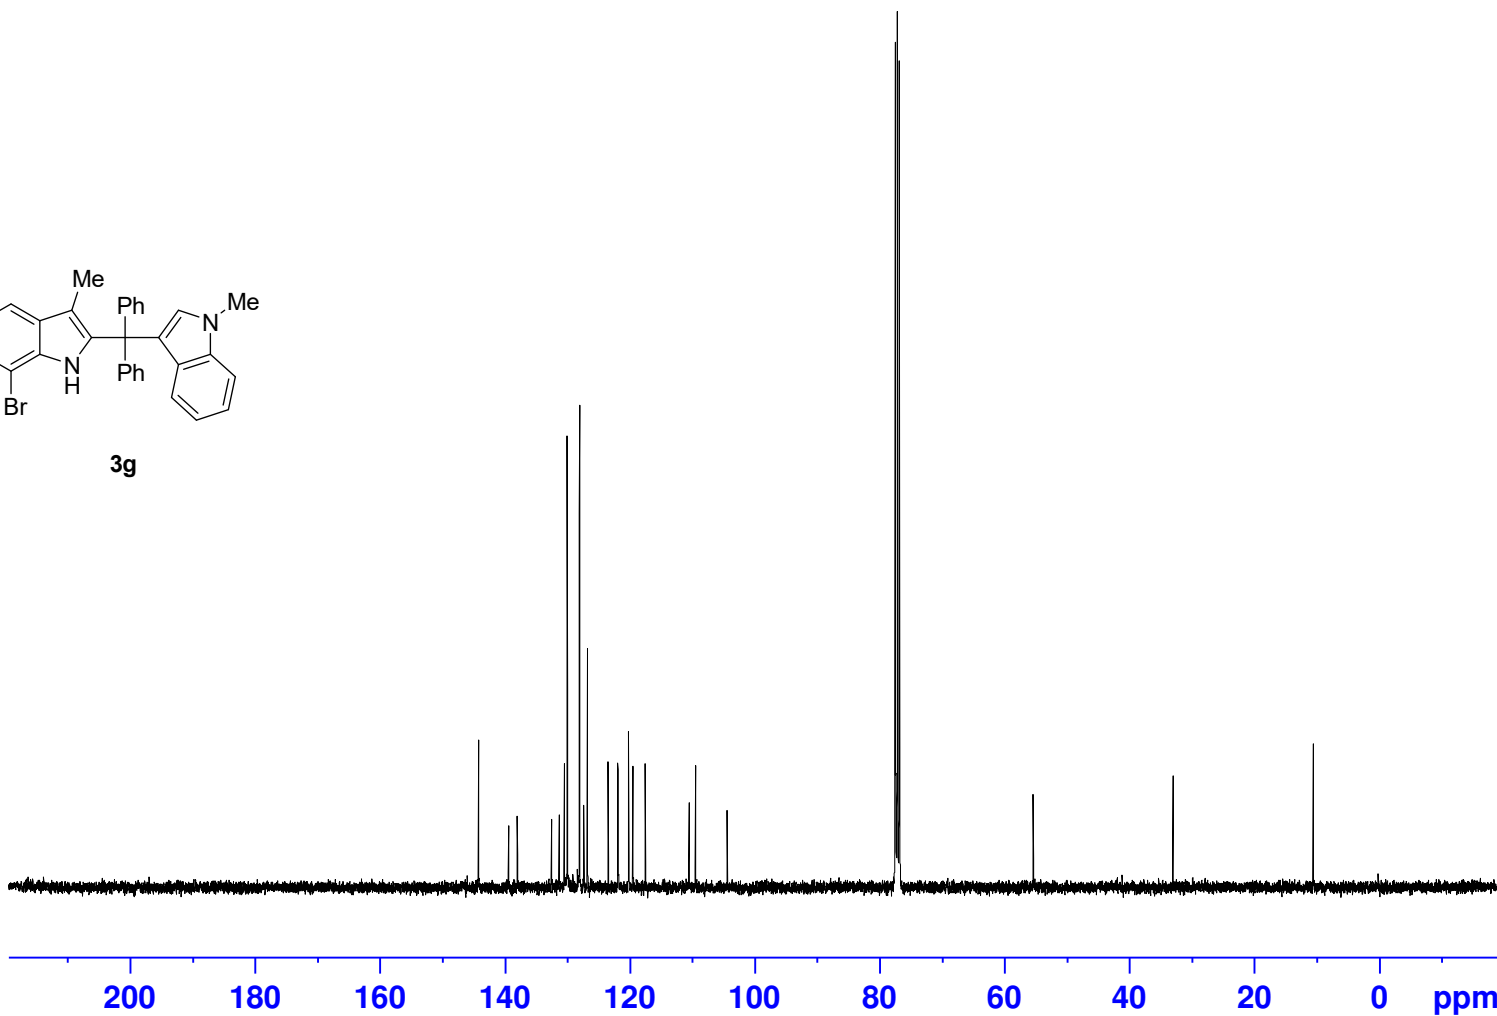

ncc-2-82



Current Data Parameters  
NAME 20231010-400M  
EXPNO 22  
PROCNO 1

F2 - Acquisition Parameters  
Date\_ 20231010  
Time 1.23  
INSTRUM spect  
PROBHD 5 mm PADUL 13C  
PULPROG zg30  
TD 65536  
SOLVENT CDC13  
NS 6  
DS 2  
SWH 8223.685 Hz  
FIDRES 0.125483 Hz  
AQ 3.9845889 sec  
RG 75.43  
DW 60.800 usec  
DE 6.50 usec  
TE 293.1 K  
D1 1.00000000 sec  
TD0 1

==== CHANNEL f1 =====  
NUC1 1H  
P1 9.90 usec  
PLW1 23.00000000 W  
SFO1 400.1924713 MHz

F2 - Processing parameters  
SI 65536  
SF 400.1900139 MHz  
WDW EM  
SSB 0  
LB 0.30 Hz  
GB 0  
PC 1.00

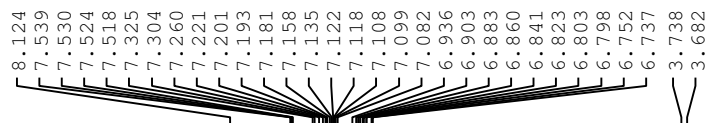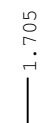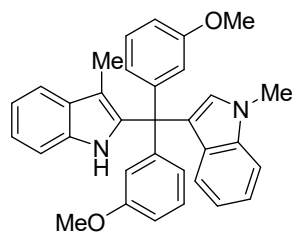

3h

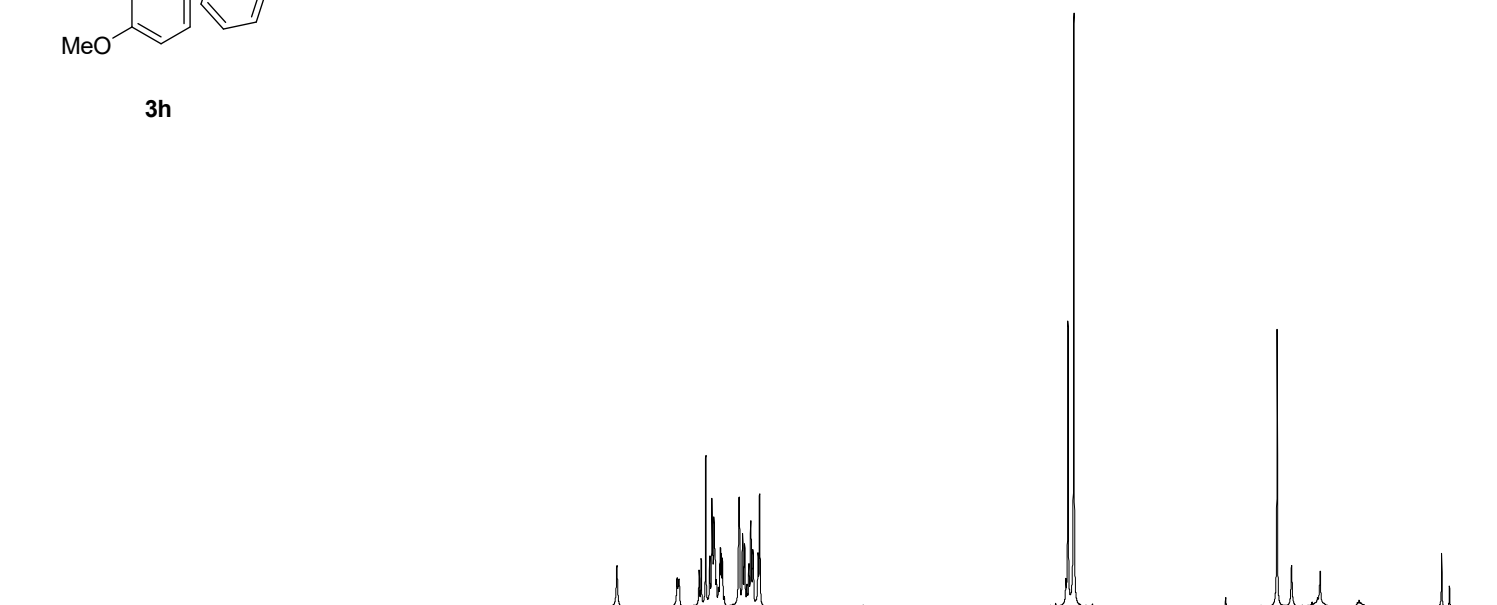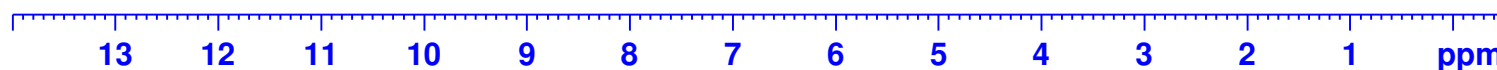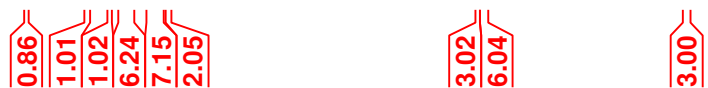

ncc-2-82



Current Data Parameters  
NAME 20231010-400M  
EXPNO 23  
PROCNO 1

F2 - Acquisition Parameters  
Date\_ 20231010  
Time 1.53  
INSTRUM spect  
PROBHD 5 mm PADUL 13C  
PULPROG zgpg30  
TD 65536  
SOLVENT CDC13  
NS 500  
DS 4  
SWH 24038.461 Hz  
FIDRES 0.366798 Hz  
AQ 1.3631488 sec  
RG 61.19  
DW 20.800 usec  
DE 6.50 usec  
TE 293.0 K  
D1 2.00000000 sec  
D11 0.03000000 sec  
TD0 1

=====  
CHANNEL f1  
NUC1 13C  
P1 9.80 usec  
PLW1 47.40000153 W  
SFO1 100.6379178 MHz

=====  
CHANNEL f2  
CPDPRG[2] waltz16  
NUC2 1H  
PCPD2 90.00 usec  
PLW2 23.00000000 W  
PLW12 0.30712000 W  
PLW13 0.24877000 W  
SFO2 400.1916008 MHz

F2 - Processing parameters  
SI 32768  
SF 100.6278491 MHz  
WDW EM  
SSB 0  
LB 1.00 Hz  
GB 0  
PC 1.40

159.37  
146.17  
138.33  
137.97  
133.73  
130.46  
130.31  
128.73  
127.60  
123.02  
122.01  
121.72  
121.16  
120.12  
119.40  
118.95  
118.33  
116.57  
111.28  
110.76  
109.38  
109.20  
77.47  
77.15  
76.84  
55.34  
55.25  
32.95  
10.42

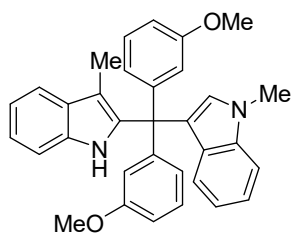

3h

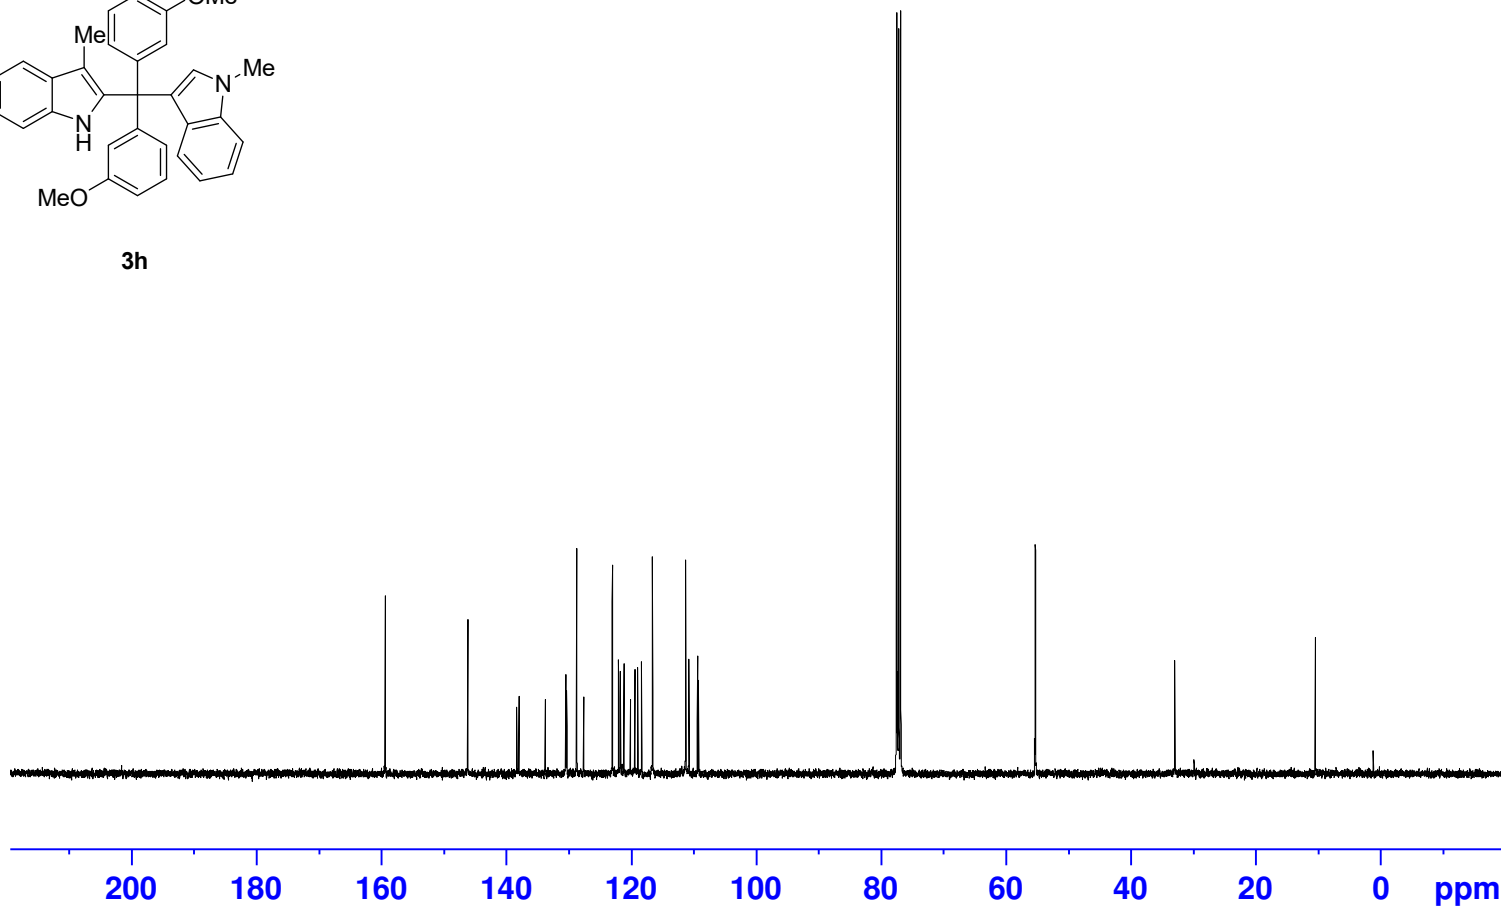

ncc-2-51-2

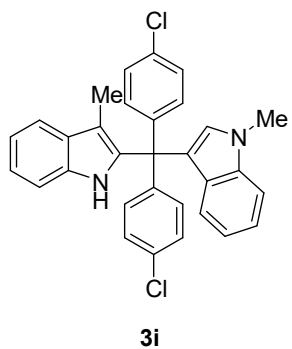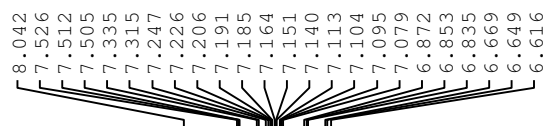

3.734

1.644



Current Data Parameters  
NAME 20230917-400M  
EXPNO 9  
PROCNO 1

F2 - Acquisition Parameters  
Date\_ 20230916  
Time 22.40  
INSTRUM spect  
PROBHD 5 mm PADUL 13C  
PULPROG zg30  
TD 65536  
SOLVENT CDC13  
NS 10  
DS 2  
SWH 8223.685 Hz  
FIDRES 0.125483 Hz  
AQ 3.9845889 sec  
RG 75.43  
DW 60.800 usec  
DE 6.50 usec  
TE 290.8 K  
D1 1.00000000 sec  
TD0 1

==== CHANNEL f1 =====  
NUC1 1H  
P1 9.90 usec  
PLW1 23.00000000 W  
SFO1 400.1924713 MHz

F2 - Processing parameters  
SI 65536  
SF 400.1900270 MHz  
WDW EM  
SSB 0  
LB 0.30 Hz  
GB 0  
PC 1.00

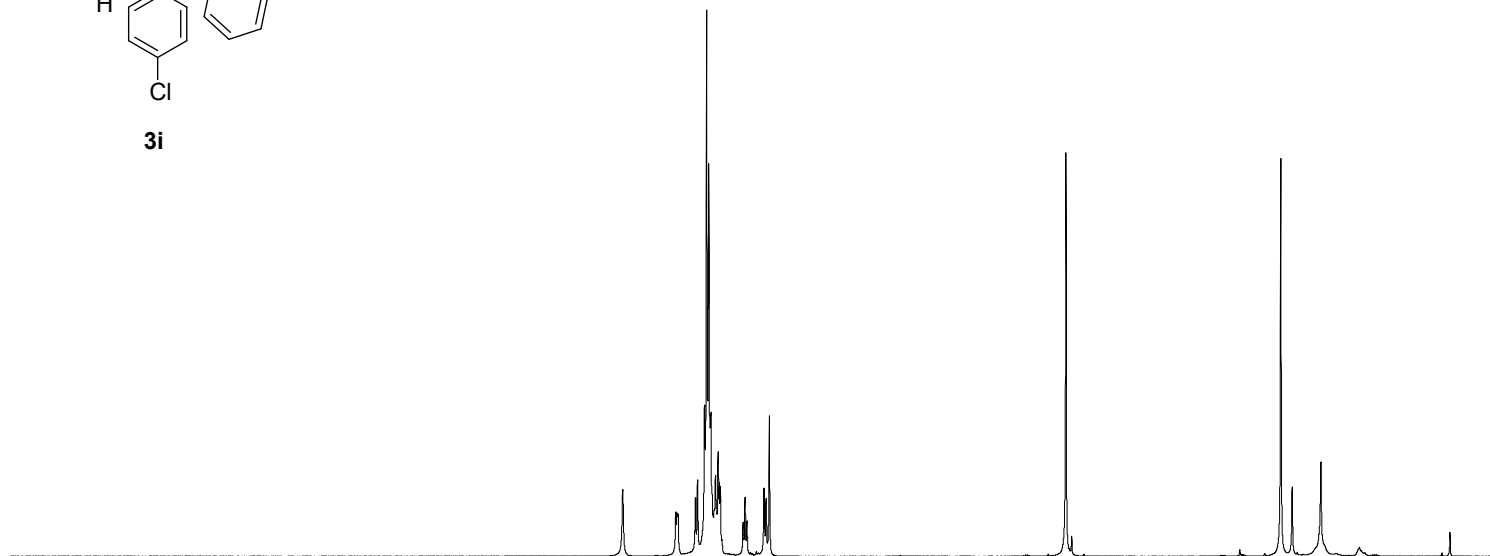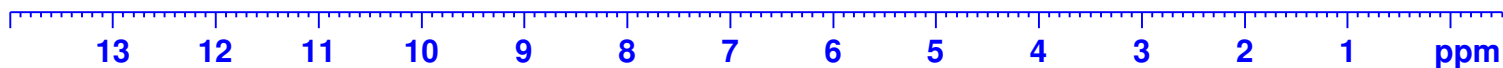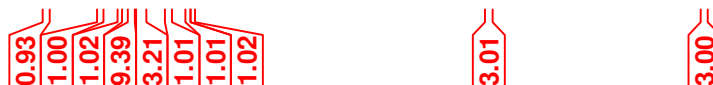

ncc-2-51-2



Current Data Parameters  
NAME 20230917-400M  
EXPNO 10  
PROCNO 1

F2 - Acquisition Parameters  
Date\_ 20230916  
Time 23.38  
INSTRUM spect  
PROBHD 5 mm PADUL 13C  
PULPROG zgpg30  
TD 65536  
SOLVENT CDC13  
NS 1000  
DS 4  
SWH 24038.461 Hz  
FIDRES 0.366798 Hz  
AQ 1.3631488 sec  
RG 50.16  
DW 20.800 usec  
DE 6.50 usec  
TE 291.6 K  
D1 2.00000000 sec  
D11 0.03000000 sec  
TD0 1

=====  
CHANNEL f1  
NUC1 13C  
P1 9.80 usec  
PLW1 47.40000153 W  
SFO1 100.6379178 MHz

=====  
CHANNEL f2  
CPDPRG[2] waltz16  
NUC2 1H  
PCPD2 90.00 usec  
PLW2 23.00000000 W  
PLW12 0.30712000 W  
PLW13 0.24877000 W  
SFO2 400.1916008 MHz

F2 - Processing parameters  
SI 32768  
SF 100.6278499 MHz  
WDW EM  
SSB 0  
LB 1.00 Hz  
GB 0  
PC 1.40

142.58  
138.10  
137.74  
133.78  
132.66  
131.32  
130.42  
130.11  
128.19  
126.95  
122.14  
121.67  
121.61  
119.84  
119.81  
119.31  
118.37  
110.90  
109.70  
109.21  
77.47  
77.16  
76.84  
54.47  
33.04  
10.49

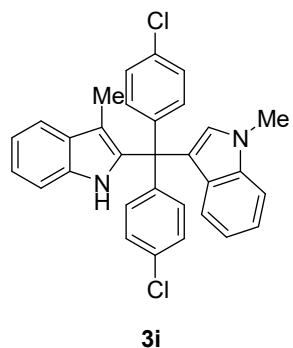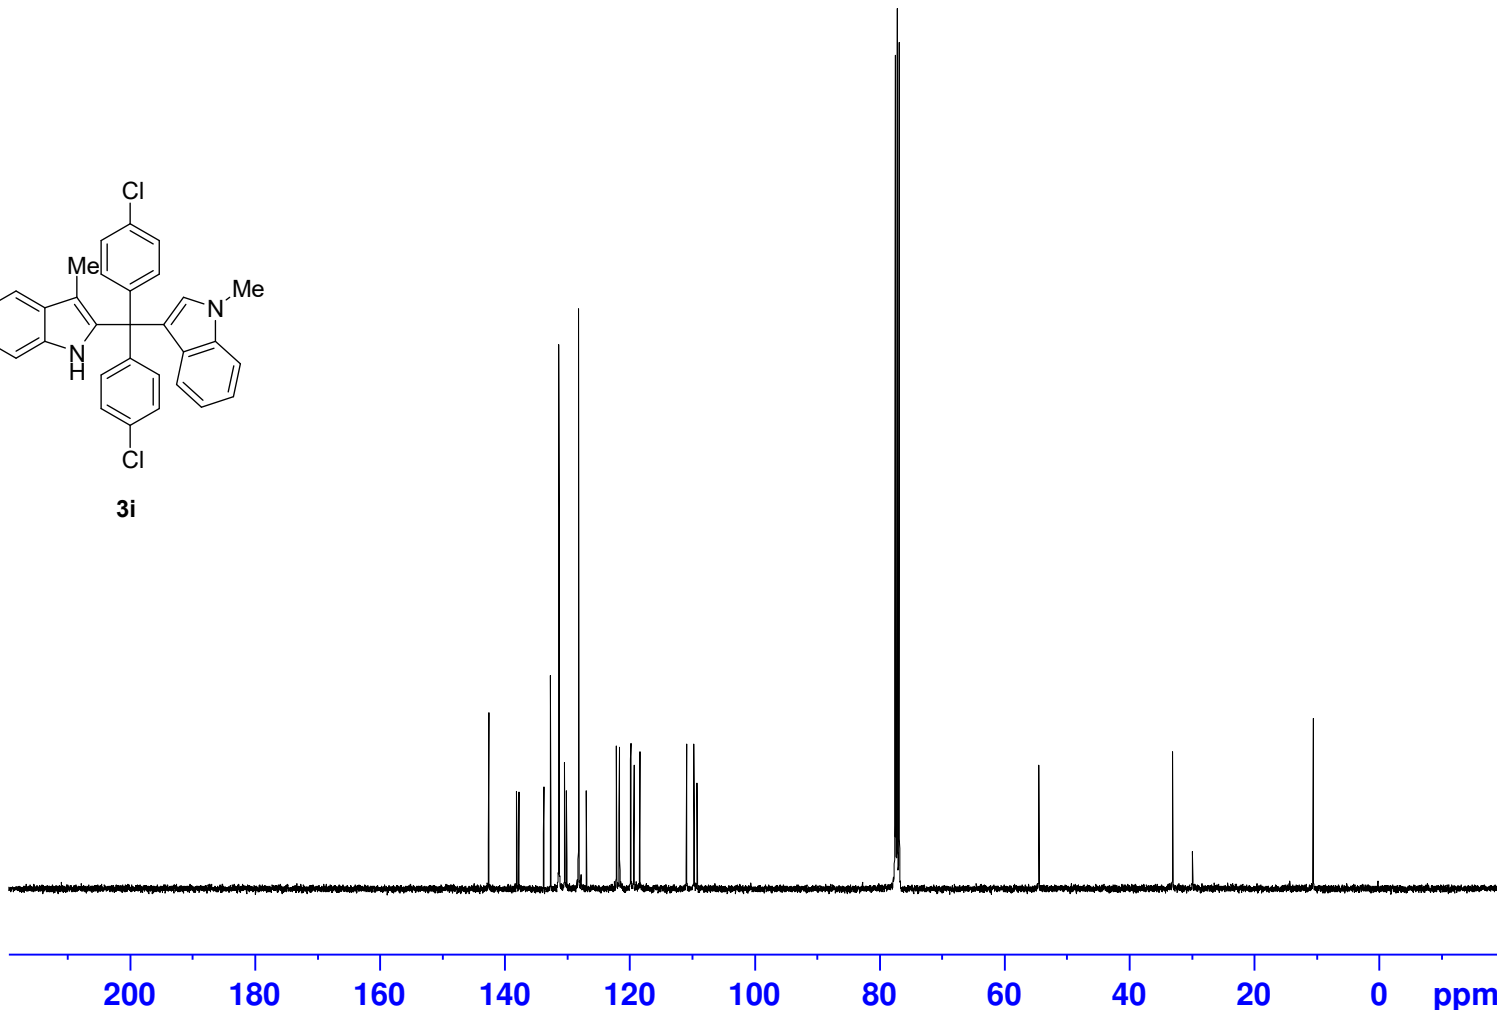

ncc-2-98-2

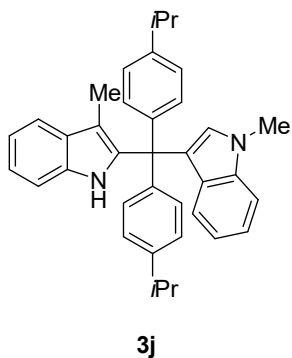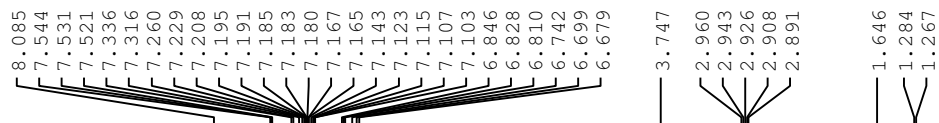

Current Data Parameters  
NAME 20231104-400M  
EXPNO 27  
PROCNO 1

F2 - Acquisition Parameters  
Date\_ 20231103  
Time 23.16  
INSTRUM spect  
PROBHD 5 mm PADUL 13C  
PULPROG zg30  
TD 65536  
SOLVENT CDC13  
NS 8  
DS 2  
SWH 8223.685 Hz  
FIDRES 0.125483 Hz  
AQ 3.9845889 sec  
RG 68.24  
DW 60.800 usec  
DE 6.50 usec  
TE 291.7 K  
D1 1.00000000 sec  
TD0 1

==== CHANNEL f1 =====  
NUC1 1H  
P1 9.90 usec  
PLW1 23.00000000 W  
SFO1 400.1924713 MHz

F2 - Processing parameters  
SI 65536  
SF 400.1900138 MHz  
WDW EM  
SSB 0  
LB 0.30 Hz  
GB 0  
PC 1.00

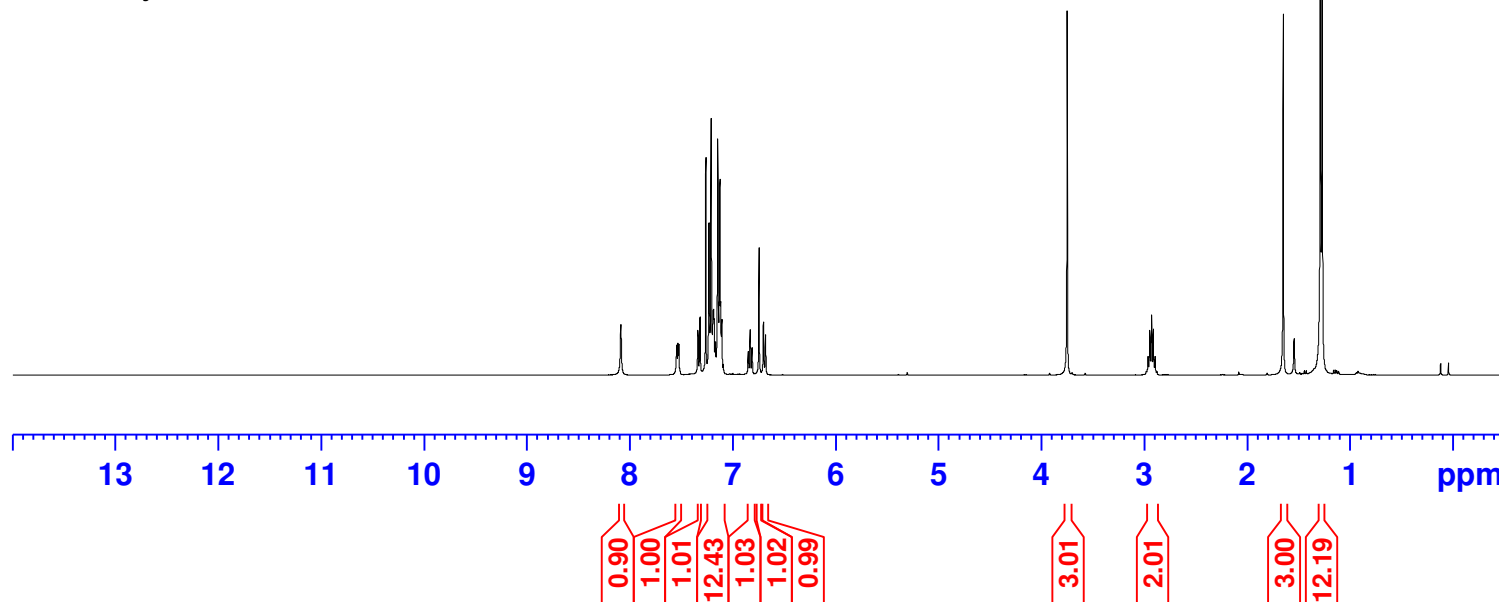



ncc-2-98-2



Current Data Parameters  
NAME 20231104-400M  
EXPNO 28  
PROCNO 1

F2 - Acquisition Parameters  
Date\_ 20231103  
Time 23.40  
INSTRUM spect  
PROBHD 5 mm PADUL 13C  
PULPROG zgpg30  
TD 65536  
SOLVENT CDC13  
NS 400  
DS 4  
SWH 24038.461 Hz  
FIDRES 0.366798 Hz  
AQ 1.3631488 sec  
RG 37.77  
DW 20.800 usec  
DE 6.50 usec  
TE 292.3 K  
D1 2.00000000 sec  
D11 0.03000000 sec  
TD0 1

==== CHANNEL f1 =====  
NUC1 13C  
P1 9.80 usec  
PLW1 47.40000153 W  
SFO1 100.6379178 MHz

==== CHANNEL f2 =====  
CPDPRG[2] waltz16  
NUC2 1H  
PCPD2 90.00 usec  
PLW2 23.00000000 W  
PLW12 0.30712000 W  
PLW13 0.24877000 W  
SFO2 400.1916008 MHz

F2 - Processing parameters  
SI 32768  
SF 100.6278492 MHz  
WDW EM  
SSB 0  
LB 1.00 Hz  
GB 0  
PC 1.40

146.91  
142.10  
139.10  
137.95  
133.66  
130.45  
130.36  
129.97  
127.75  
125.86  
122.19  
121.57  
121.00  
120.77  
119.20  
118.92  
118.19  
110.74  
109.29  
108.99  
  
77.48  
77.16  
76.84  
  
54.64  
  
33.65  
32.94  
24.13  
  
10.25

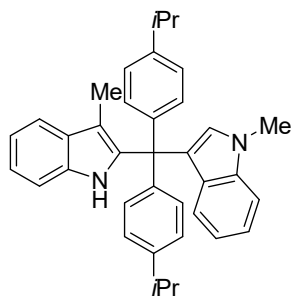

3j

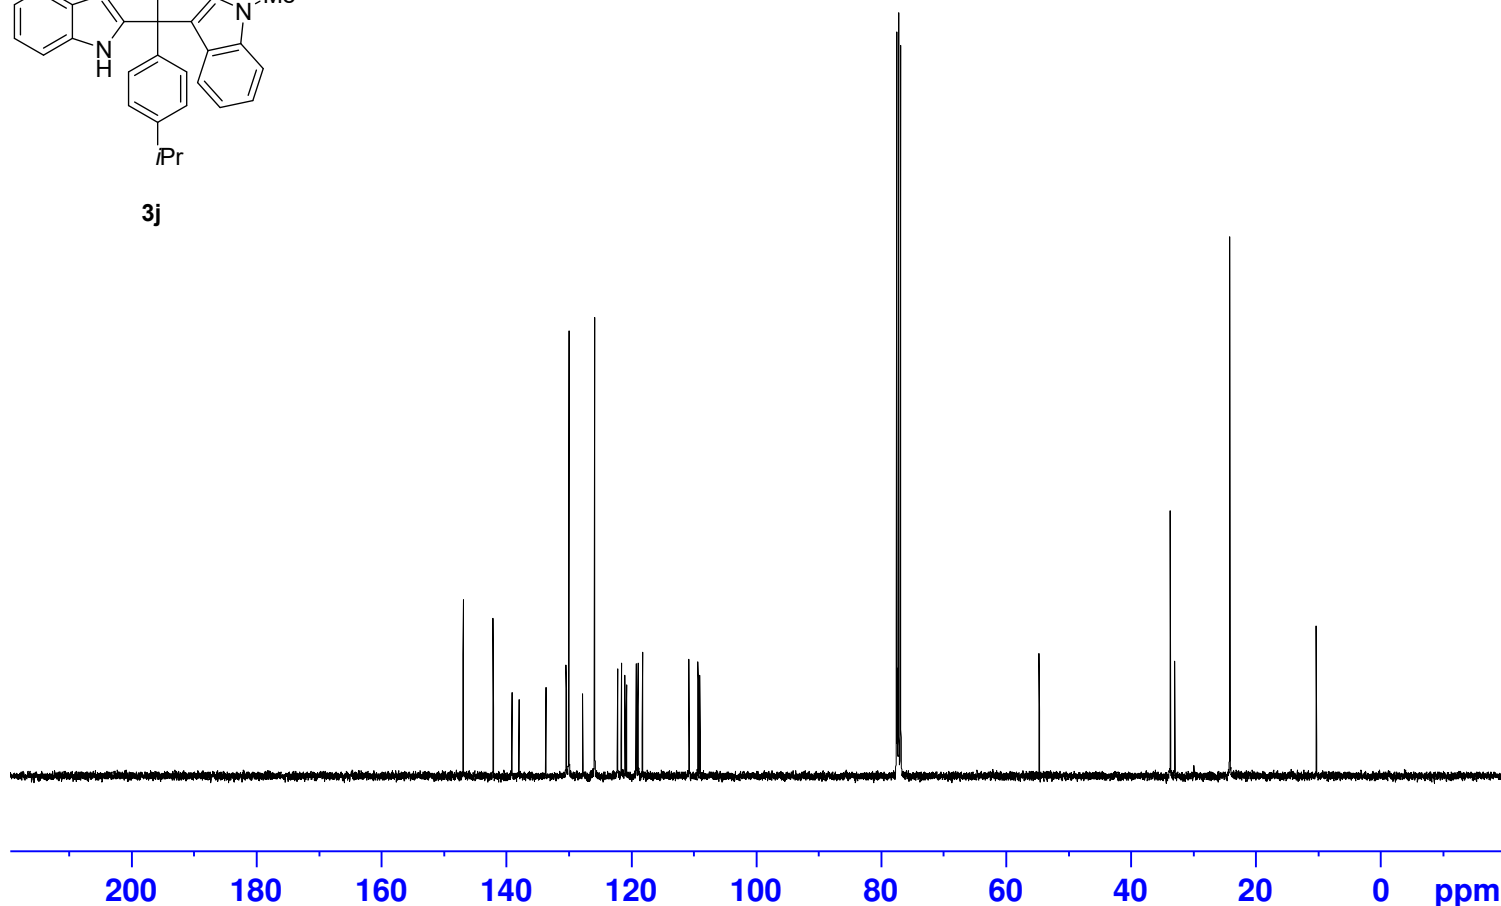

ncc-2-99

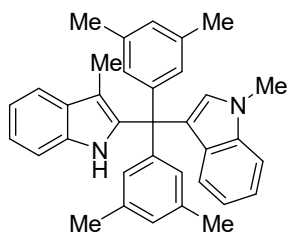

3k

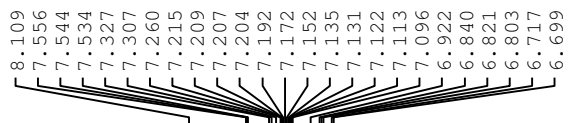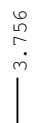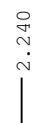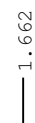

Current Data Parameters  
NAME 20231103-400M  
EXPNO 32  
PROCNO 1

F2 - Acquisition Parameters  
Date\_ 20231103  
Time 1.03  
INSTRUM spect  
PROBHD 5 mm PADUL 13C  
PULPROG zg30  
TD 65536  
SOLVENT CDC13  
NS 6  
DS 0  
SWH 8223.685 Hz  
FIDRES 0.125483 Hz  
AQ 3.9845889 sec  
RG 68.24  
DW 60.800 usec  
DE 6.50 usec  
TE 292.0 K  
D1 1.00000000 sec  
TD0 1

==== CHANNEL f1 =====  
NUC1 1H  
P1 9.90 usec  
PLW1 23.00000000 W  
SFO1 400.1924713 MHz

F2 - Processing parameters  
SI 65536  
SF 400.1900139 MHz  
WDW EM  
SSB 0  
LB 0.30 Hz  
GB 0  
PC 1.00

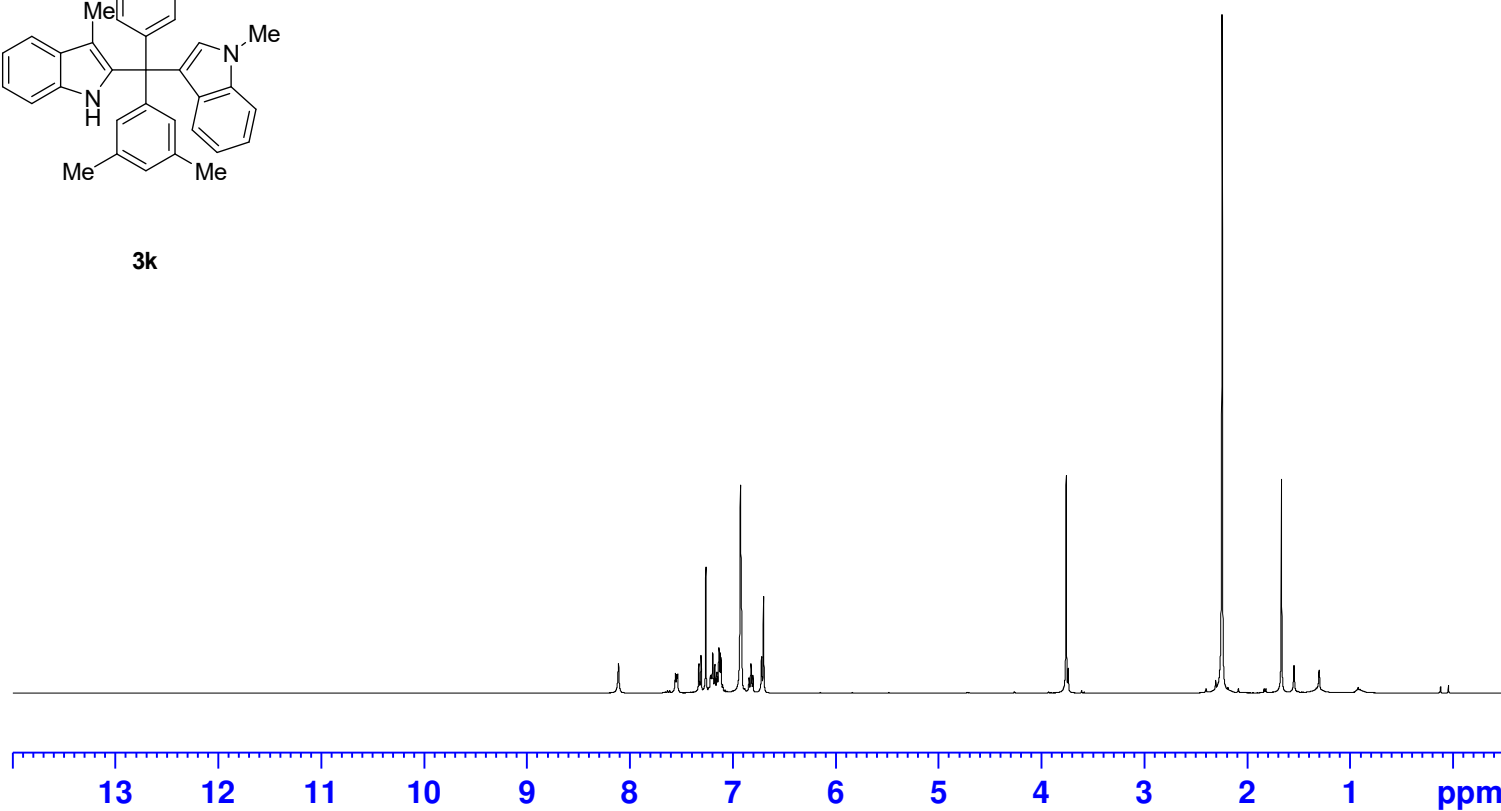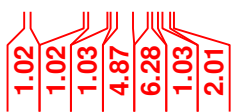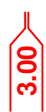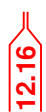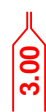

ncc-2-99



Current Data Parameters  
NAME 20231103-400M  
EXPNO 33  
PROCNO 1

F2 - Acquisition Parameters  
Date\_ 20231103  
Time 1.33  
INSTRUM spect  
PROBHD 5 mm PADUL 13C  
PULPROG zgpg30  
TD 65536  
SOLVENT CDC13  
NS 500  
DS 4  
SWH 24038.461 Hz  
FIDRES 0.366798 Hz  
AQ 1.3631488 sec  
RG 35.06  
DW 20.800 usec  
DE 6.50 usec  
TE 292.7 K  
D1 2.0000000 sec  
D11 0.0300000 sec  
TD0 1

==== CHANNEL f1 =====  
NUC1 13C  
P1 9.80 usec  
PLW1 47.4000153 W  
SFO1 100.6379178 MHz

==== CHANNEL f2 =====  
CPDPRG[2] waltz16  
NUC2 1H  
PCPD2 90.00 usec  
PLW2 23.0000000 W  
PLW12 0.3071200 W  
PLW13 0.2487700 W  
SFO2 400.1916008 MHz

F2 - Processing parameters  
SI 32768  
SF 100.6278492 MHz  
WDW EM  
SSB 0  
LB 1.00 Hz  
GB 0  
PC 1.40

144.53  
138.81  
137.94  
137.02  
133.62  
130.43  
130.33  
128.14  
128.01  
127.81  
122.16  
121.51  
120.87  
120.78  
119.21  
118.76  
118.33  
110.72  
109.20  
  
77.48  
77.16  
76.84  
  
55.06  
  
32.97  
  
21.79  
  
10.41

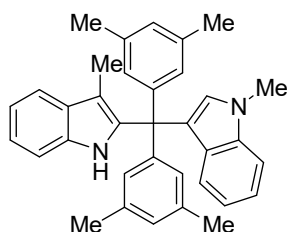

3k

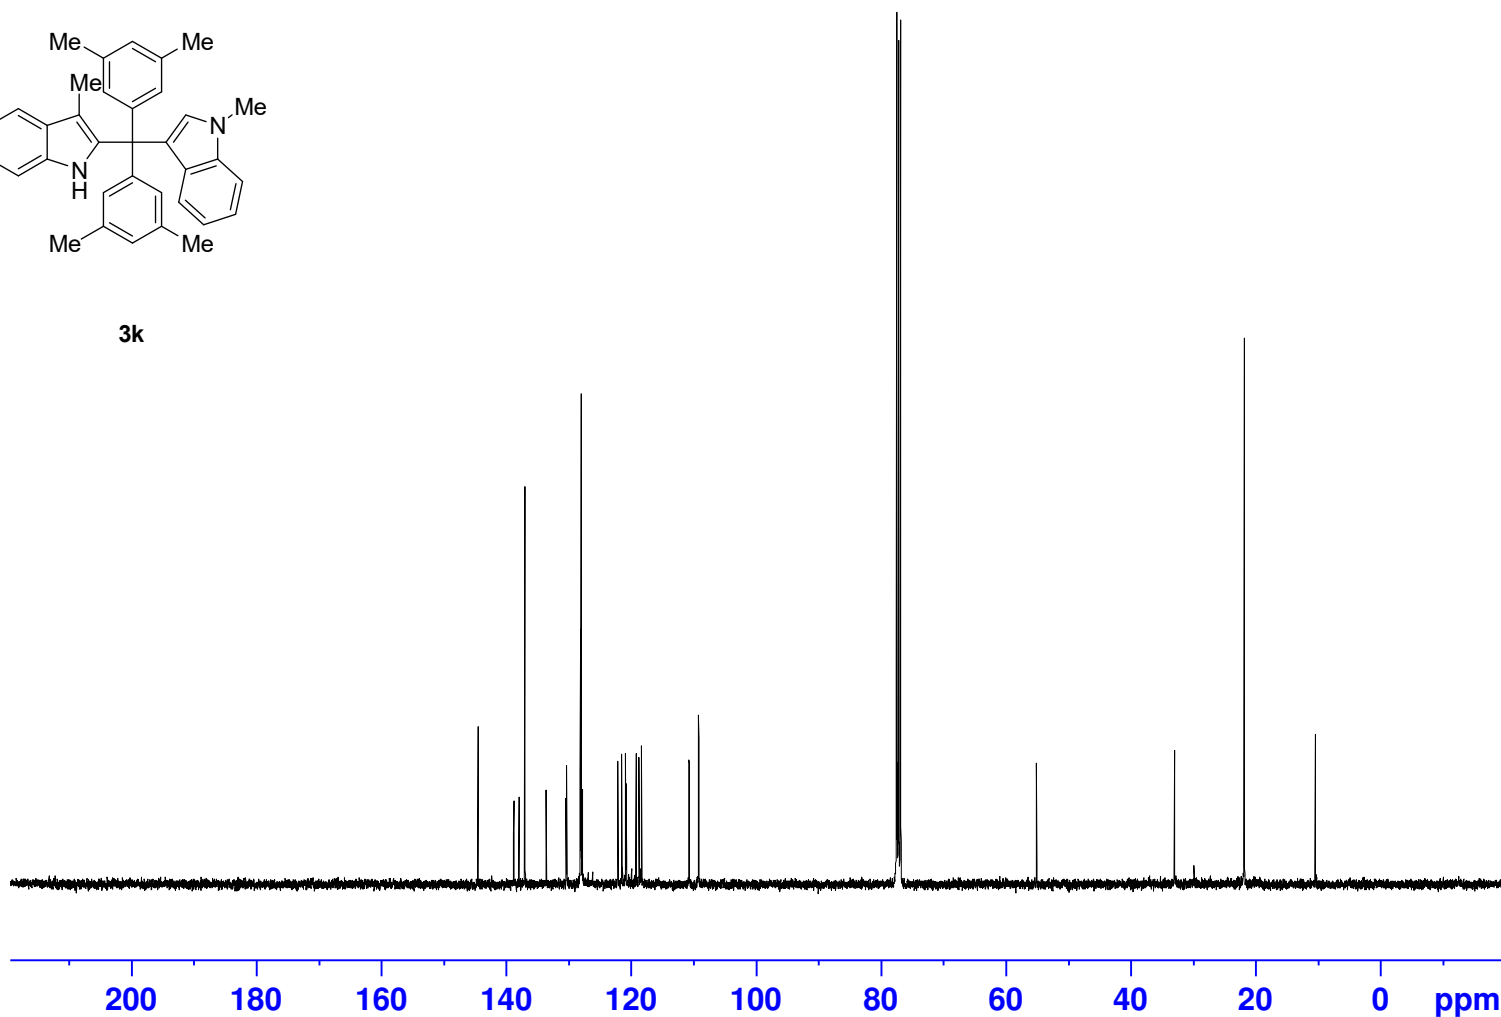

ncc-3-4

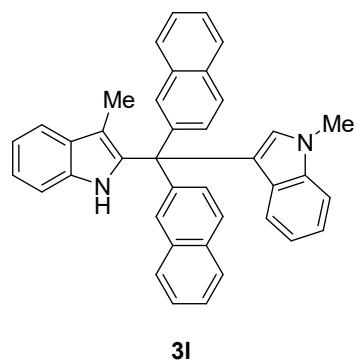

8.249  
7.885  
7.866  
7.846  
7.761  
7.739  
7.714  
7.597  
7.584  
7.575  
7.523  
7.507  
7.489  
7.484  
7.462  
7.443  
7.422  
7.418  
7.364  
7.344  
7.260  
7.233  
7.222  
7.210  
7.204  
7.184  
7.178  
7.168  
7.159  
7.150  
7.134  
6.795  
6.787  
6.771  
6.751  
3.763

1.707



Current Data Parameters  
NAME 20231104-400M-2  
EXPNO 10  
PROCNO 1

F2 - Acquisition Parameters  
Date\_ 20231104  
Time 12.32  
INSTRUM spect  
PROBHD 5 mm PADUL 13C  
PULPROG zg30  
TD 65536  
SOLVENT CDCl3  
NS 8  
DS 2  
SWH 8223.685 Hz  
FIDRES 0.125483 Hz  
AQ 3.9845889 sec  
RG 100.49  
DW 60.800 usec  
DE 6.50 usec  
TE 292.8 K  
D1 1.00000000 sec  
TD0 1

==== CHANNEL f1 =====  
NUC1 1H  
P1 9.90 usec  
PLW1 23.00000000 W  
SFO1 400.1924713 MHz

F2 - Processing parameters  
SI 65536  
SF 400.1900139 MHz  
WDW EM  
SSB 0  
LB 0.30 Hz  
GB 0  
PC 1.00

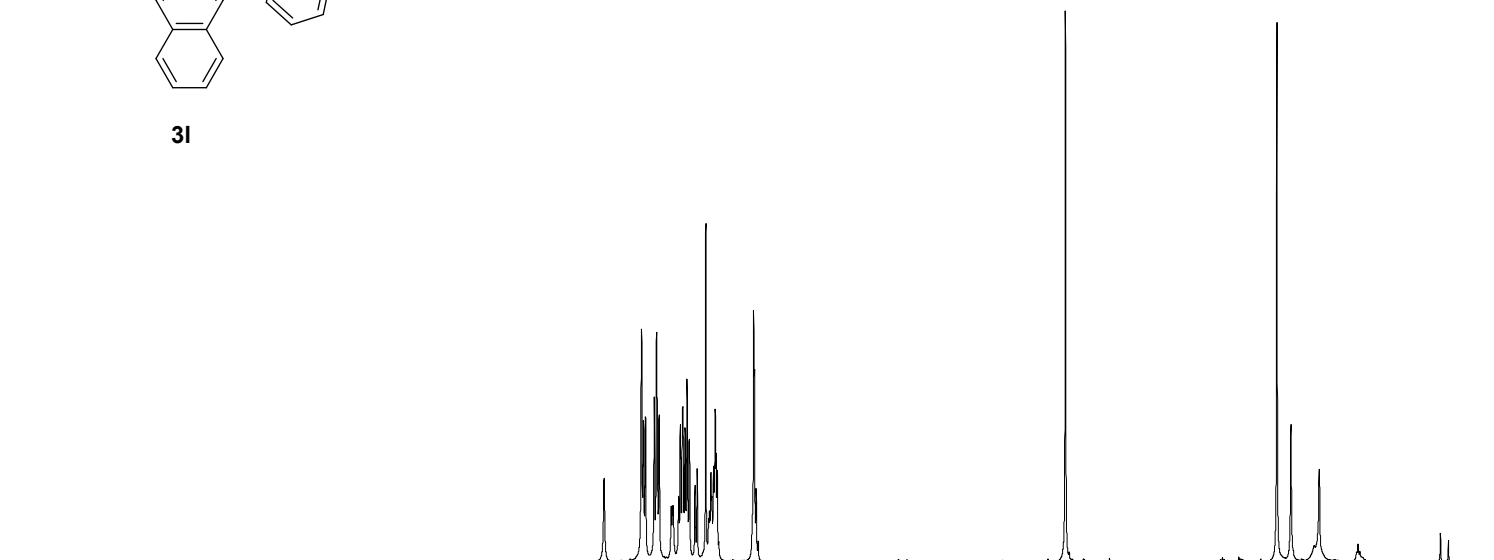

13 12 11 10 9 8 7 6 5 4 3 2 1 ppm

0.97  
2.02  
2.02  
4.05  
1.01  
6.18  
1.03  
4.14  
3.01

3.01

3.00

ncc-3-4

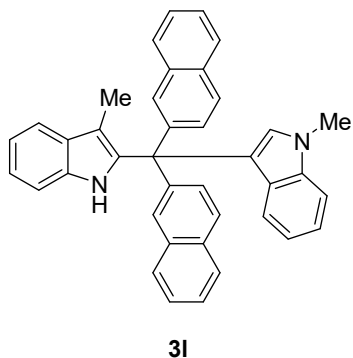

141.81  
138.14  
137.99  
133.90  
133.20  
132.28  
130.52  
130.35  
129.31  
128.71  
128.01  
127.48  
127.45  
127.30  
126.14  
126.04  
121.90  
121.84  
121.34  
120.04  
119.64  
119.09  
118.44  
110.89  
109.70  
109.48  
77.47  
77.16  
76.84

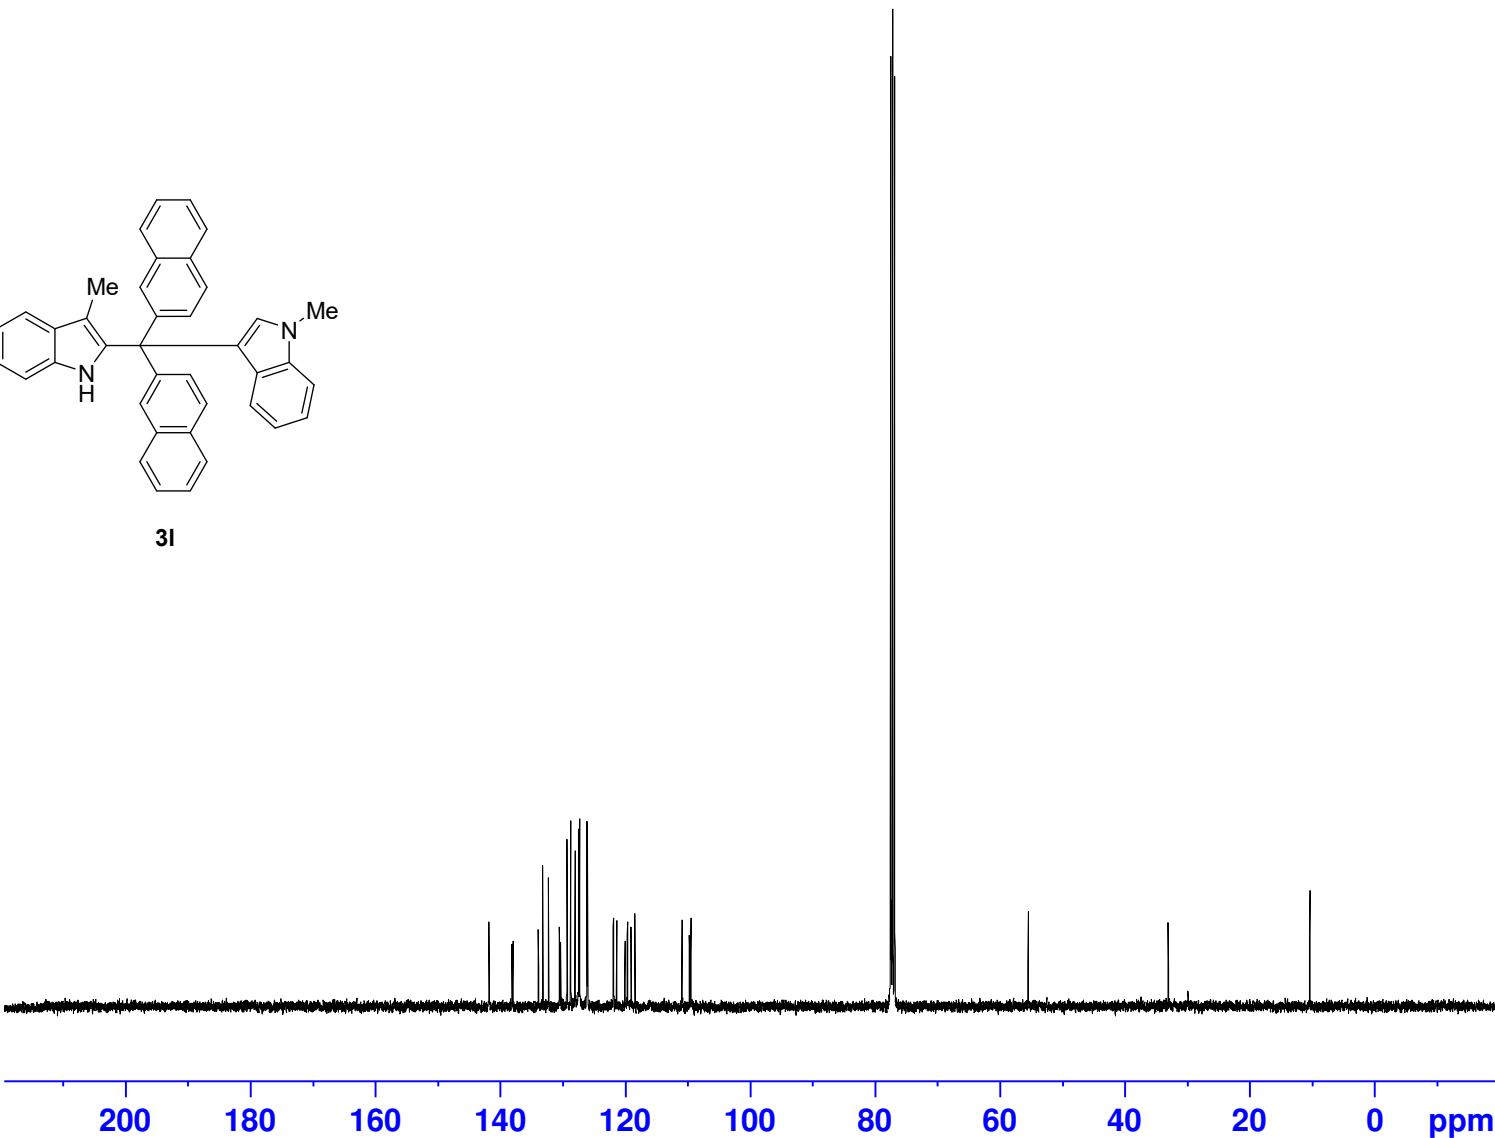

Current Data Parameters  
NAME 20231104-400M-2  
EXPNO 9  
PROCNO 1

F2 - Acquisition Parameters  
Date\_ 20231104  
Time 12.30  
INSTRUM spect  
PROBHD 5 mm PADUL 13C  
PULPROG zgpg30  
TD 65536  
SOLVENT CDC13  
NS 400  
DS 4  
SWH 24038.461 Hz  
FIDRES 0.366798 Hz  
AQ 1.3631488 sec  
RG 35.06  
DW 20.800 usec  
DE 6.50 usec  
TE 293.3 K  
D1 2.00000000 sec  
D11 0.03000000 sec  
TD0 1

==== CHANNEL f1 =====  
NUC1 13C  
P1 9.80 usec  
PLW1 47.40000153 W  
SFO1 100.6379178 MHz

==== CHANNEL f2 =====  
CPDPRG[2] waltz16  
NUC2 1H  
PCPD2 90.00 usec  
PLW2 23.00000000 W  
PLW12 0.30712000 W  
PLW13 0.24877000 W  
SFO2 400.1916008 MHz

F2 - Processing parameters  
SI 32768  
SF 100.6278492 MHz  
WDW EM  
SSB 0  
LB 1.00 Hz  
GB 0  
PC 1.40

ncc-5-22

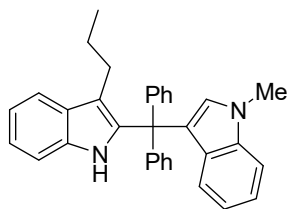

3m

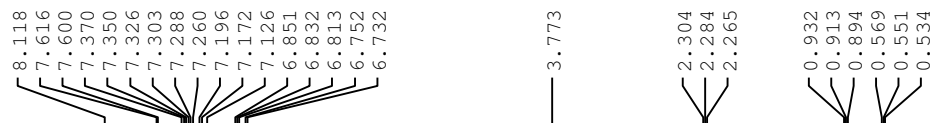

Current Data Parameters  
NAME 20240705-400M  
EXPNO 13  
PROCNO 1

F2 - Acquisition Parameters  
Date\_ 20240704  
Time 21.46  
INSTRUM spect  
PROBHD 5 mm PADUL 13C  
PULPROG zg30  
TD 65536  
SOLVENT CDC13  
NS 16  
DS 2  
SWH 8223.685 Hz  
FIDRES 0.125483 Hz  
AQ 3.9845889 sec  
RG 53.3  
DW 60.800 usec  
DE 6.50 usec  
TE 292.8 K  
D1 1.00000000 sec  
TD0 1

==== CHANNEL f1 =====  
NUC1 1H  
P1 9.90 usec  
PLW1 23.00000000 W  
SFO1 400.1924713 MHz

F2 - Processing parameters  
SI 65536  
SF 400.1900146 MHz  
WDW EM  
SSB 0  
LB 0.30 Hz  
GB 0  
PC 1.00

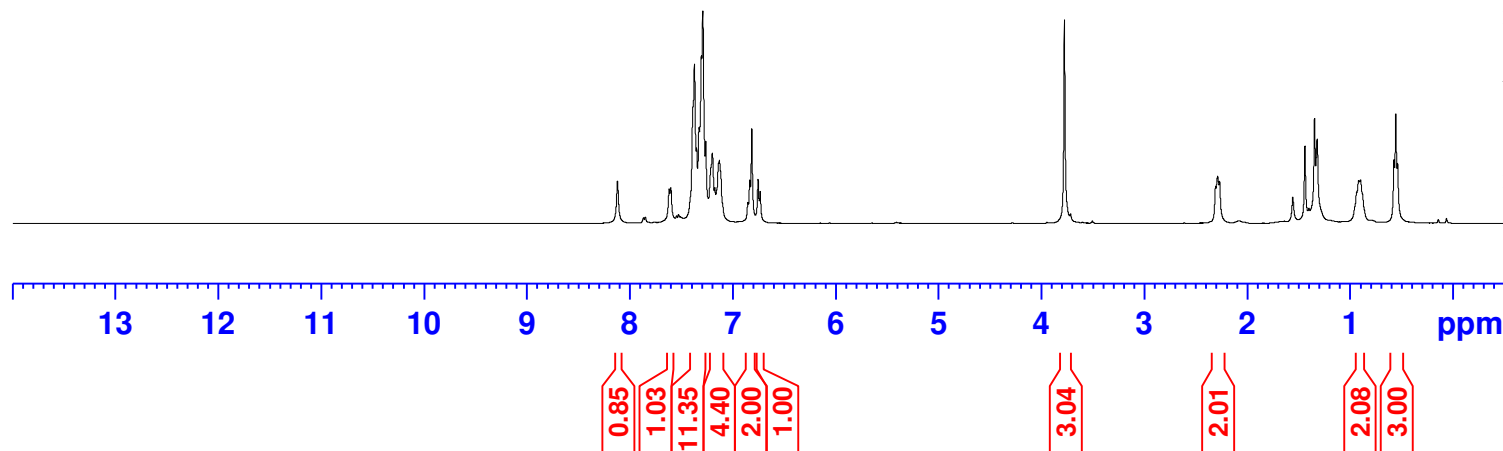

ncc-5-22

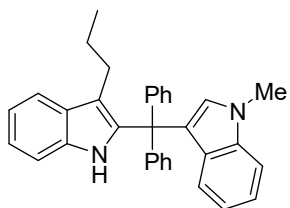

3m

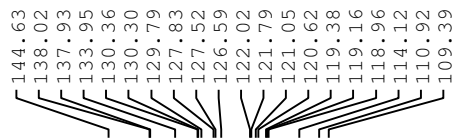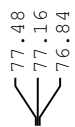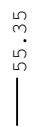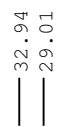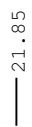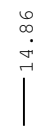

Current Data Parameters  
NAME 20240705-400M  
EXPNO 14  
PROCNO 1

F2 - Acquisition Parameters  
Date\_ 20240704  
Time 22.22  
INSTRUM spect  
PROBHD 5 mm PADUL 13C  
PULPROG zgpg30  
TD 65536  
SOLVENT CDC13  
NS 600  
DS 4  
SWH 24038.461 Hz  
FIDRES 0.366798 Hz  
AQ 1.3631488 sec  
RG 44.2  
DW 20.800 usec  
DE 6.50 usec  
TE 293.4 K  
D1 2.00000000 sec  
D11 0.03000000 sec  
TD0 1

===== CHANNEL f1 =====  
NUC1 13C  
P1 9.80 usec  
PLW1 47.40000153 W  
SFO1 100.6379178 MHz

===== CHANNEL f2 =====  
CPDPRG[2] waltz16  
NUC2 1H  
PCPD2 90.00 usec  
PLW2 23.00000000 W  
PLW12 0.30712000 W  
PLW13 0.24877000 W  
SFO2 400.1916008 MHz

F2 - Processing parameters  
SI 32768  
SF 100.6278513 MHz  
WDW EM  
SSB 0  
LB 1.00 Hz  
GB 0  
PC 1.40

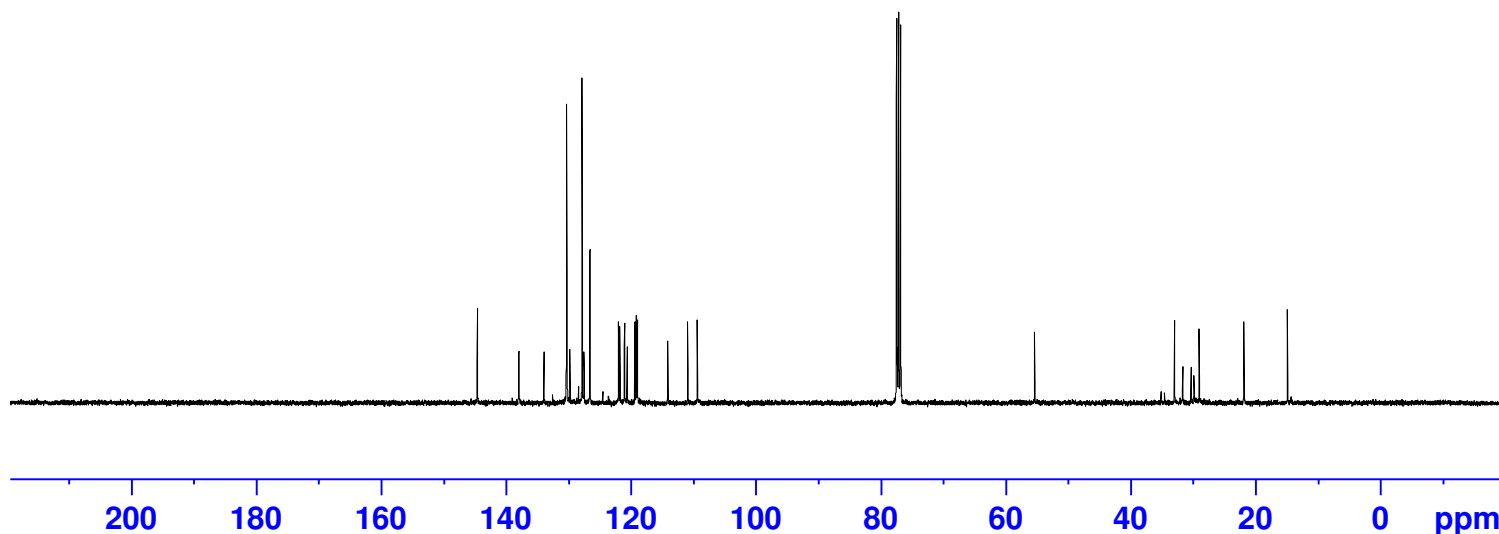

ncc-5-15



Current Data Parameters  
NAME 20240702-400M  
EXPNO 22  
PROCNO 1

F2 - Acquisition Parameters  
Date\_ 20240702  
Time 5.34  
INSTRUM spect  
PROBHD 5 mm PADUL 13C  
PULPROG zg30  
TD 65536  
SOLVENT CDC13  
NS 6  
DS 2  
SWH 8223.685 Hz  
FIDRES 0.125483 Hz  
AQ 3.9845889 sec  
RG 61.19  
DW 60.800 usec  
DE 6.50 usec  
TE 291.8 K  
D1 1.00000000 sec  
TD0 1

==== CHANNEL f1 =====  
NUC1 1H  
P1 9.90 usec  
PLW1 23.00000000 W  
SFO1 400.1924713 MHz

F2 - Processing parameters  
SI 65536  
SF 400.1900139 MHz  
WDW EM  
SSB 0  
LB 0.30 Hz  
GB 0  
PC 1.00

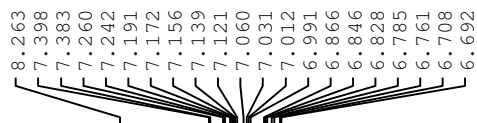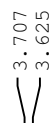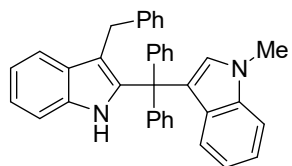

3n

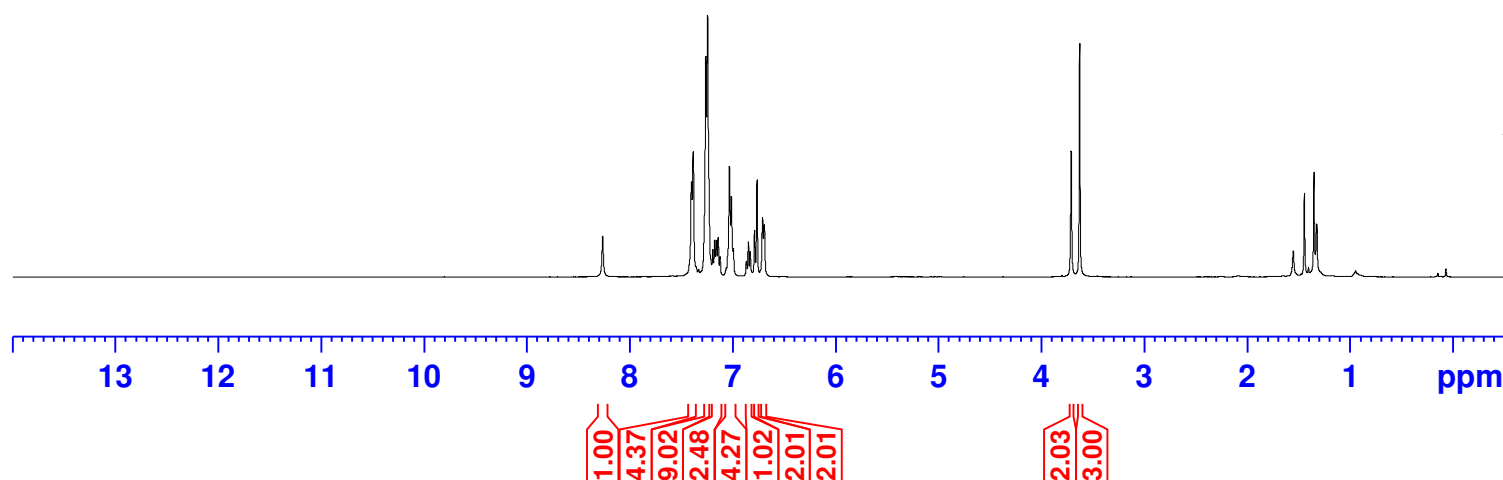



ncc-5-15

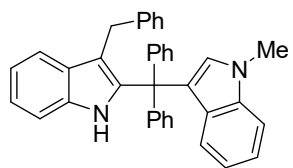

3n

144.38  
140.56  
139.46  
137.94  
133.91  
130.37  
130.18  
130.15  
128.40  
127.95  
127.63  
127.58  
126.65  
125.07  
121.93  
121.68  
121.25  
120.08  
119.78  
119.34  
119.29  
111.31  
110.88  
109.45  
77.47  
77.16  
76.84

55.46

32.77  
31.82

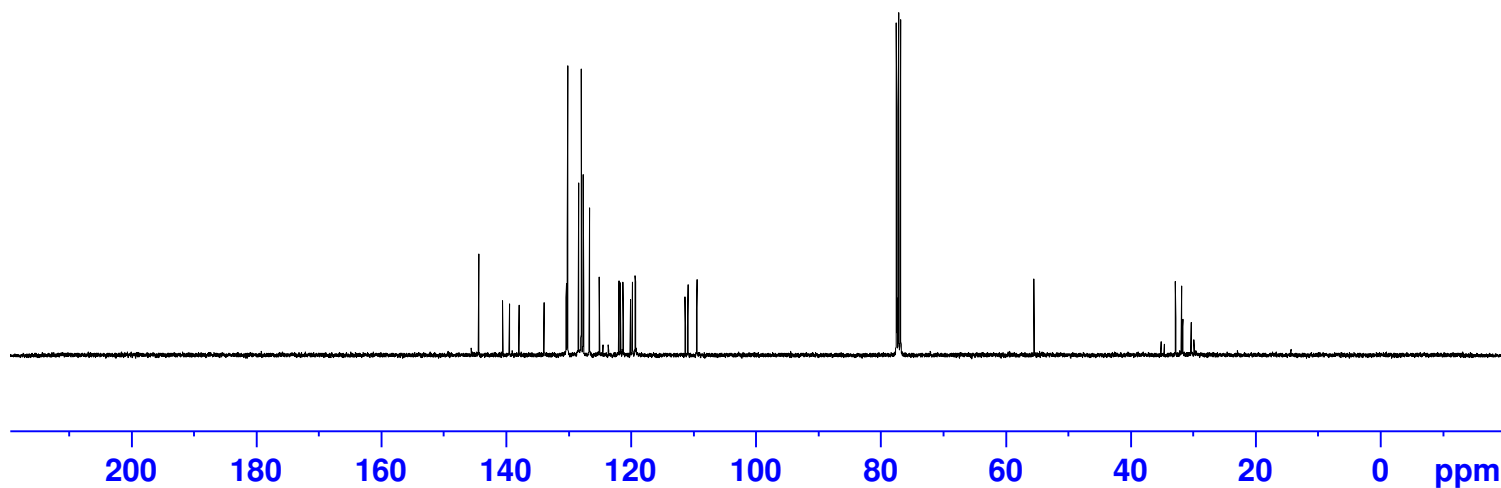

Current Data Parameters  
NAME 20240702-400M  
EXPNO 23  
PROCNO 1

F2 - Acquisition Parameters  
Date\_ 20240702  
Time 6.04  
INSTRUM spect  
PROBHD 5 mm PADUL 13C  
PULPROG zgpg30  
TD 65536  
SOLVENT CDCl3  
NS 500  
DS 4  
SWH 24038.461 Hz  
FIDRES 0.366798 Hz  
AQ 1.3631488 sec  
RG 50.16  
DW 20.800 usec  
DE 6.50 usec  
TE 292.3 K  
D1 2.00000000 sec  
D11 0.03000000 sec  
TD0 1

==== CHANNEL f1 =====  
NUC1 13C  
P1 9.80 usec  
PLW1 47.40000153 W  
SFO1 100.6379178 MHz

==== CHANNEL f2 =====  
CPDPRG[2] waltz16  
NUC2 1H  
PCPD2 90.00 usec  
PLW2 23.00000000 W  
PLW12 0.30712000 W  
PLW13 0.24877000 W  
SFO2 400.1916008 MHz

F2 - Processing parameters  
SI 32768  
SF 100.6278528 MHz  
WDW EM  
SSB 0  
LB 1.00 Hz  
GB 0  
PC 1.40

ncc-5-19

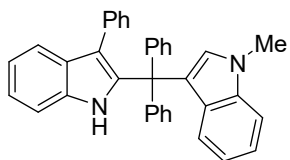

3o

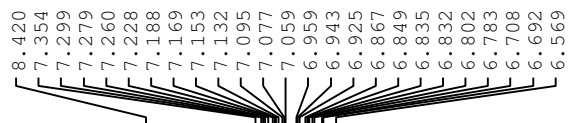

3.558



Current Data Parameters  
NAME 20240706-400M  
EXPNO 12  
PROCNO 1

F2 - Acquisition Parameters  
Date\_ 20240705  
Time 22.06  
INSTRUM spect  
PROBHD 5 mm PADUL 13C  
PULPROG zg30  
TD 65536  
SOLVENT CDCl3  
NS 8  
DS 2  
SWH 8223.685 Hz  
FIDRES 0.125483 Hz  
AQ 3.9845889 sec  
RG 61.19  
DW 60.800 usec  
DE 6.50 usec  
TE 293.2 K  
D1 1.00000000 sec  
TD0 1

==== CHANNEL f1 =====  
NUC1 1H  
P1 9.90 usec  
PLW1 23.00000000 W  
SFO1 400.1924713 MHz

F2 - Processing parameters  
SI 65536  
SF 400.1900141 MHz  
WDW EM  
SSB 0  
LB 0.30 Hz  
GB 0  
PC 1.00

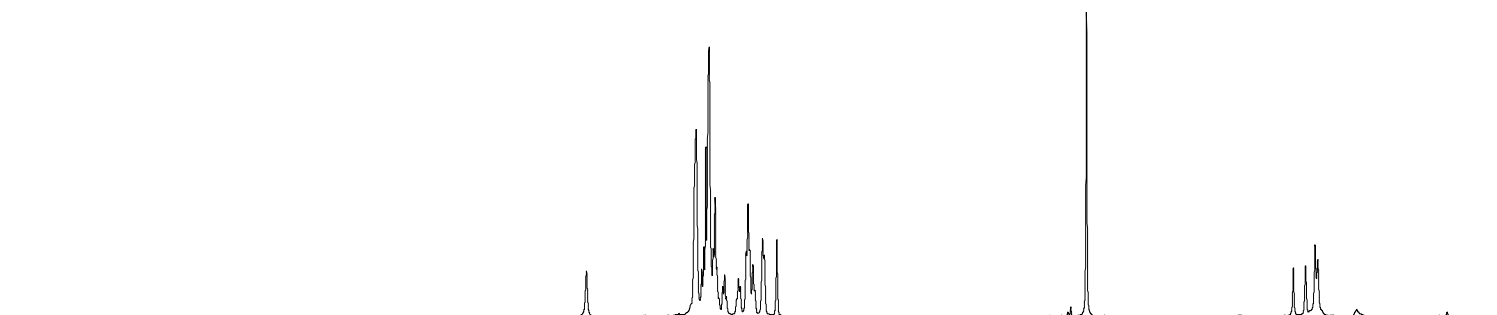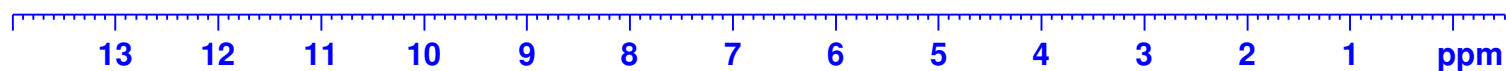

1.02  
6.59  
9.41  
1.02  
1.10  
4.31  
2.04  
1.01

3.00

ncc-5-19



Current Data Parameters  
NAME 20240706-400M  
EXPNO 13  
PROCNO 1

F2 - Acquisition Parameters  
Date\_ 20240705  
Time 22.30  
INSTRUM spect  
PROBHD 5 mm PADUL 13C  
PULPROG zgpg30  
TD 65536  
SOLVENT CDC13  
NS 400  
DS 4  
SWH 24038.461 Hz  
FIDRES 0.366798 Hz  
AQ 1.3631488 sec  
RG 37.77  
DW 20.800 usec  
DE 6.50 usec  
TE 293.9 K  
D1 2.00000000 sec  
D11 0.03000000 sec  
TD0 1

==== CHANNEL f1 =====  
NUC1 13C  
P1 9.80 usec  
PLW1 47.40000153 W  
SFO1 100.6379178 MHz

==== CHANNEL f2 =====  
CPDPRG[2] waltz16  
NUC2 1H  
PCPD2 90.00 usec  
PLW2 23.00000000 W  
PLW12 0.30712000 W  
PLW13 0.24877000 W  
SFO2 400.1916008 MHz

F2 - Processing parameters  
SI 32768  
SF 100.6278507 MHz  
WDW EM  
SSB 0  
LB 1.00 Hz  
GB 0  
PC 1.40

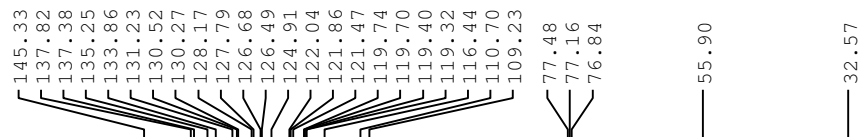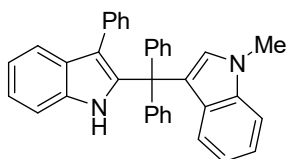

3o

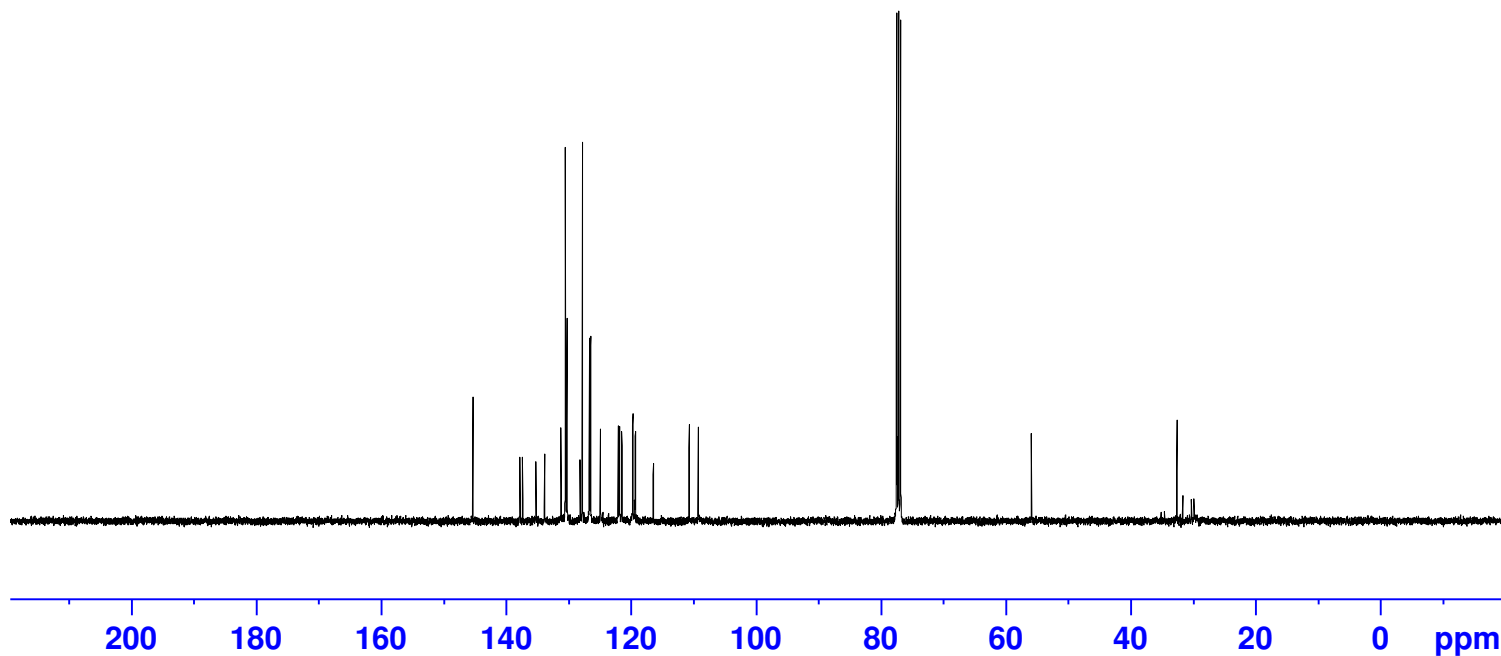

ncc-2-60



Current Data Parameters  
NAME 20230917-400M-2  
EXPNO 17  
PROCNO 1

F2 - Acquisition Parameters  
Date\_ 20230916  
Time 13.48  
INSTRUM spect  
PROBHD 5 mm PADUL 13C  
PULPROG zg30  
TD 65536  
SOLVENT CDC13  
NS 8  
DS 2  
SWH 8223.685 Hz  
FIDRES 0.125483 Hz  
AQ 3.9845889 sec  
RG 75.43  
DW 60.800 usec  
DE 6.50 usec  
TE 291.2 K  
D1 1.00000000 sec  
TD0 1

==== CHANNEL f1 =====  
NUC1 1H  
P1 9.90 usec  
PLW1 23.00000000 W  
SFO1 400.1924713 MHz

F2 - Processing parameters  
SI 65536  
SF 400.1900138 MHz  
WDW EM  
SSB 0  
LB 0.30 Hz  
GB 0  
PC 1.00

8.120  
7.556  
7.544  
7.535  
7.380  
7.360  
7.313  
7.302  
7.294  
7.286  
7.260  
7.214  
7.192  
7.180  
7.160  
7.153  
7.137  
7.128  
7.119  
6.848  
6.828  
6.810  
6.787  
6.710  
6.690  
4.167  
4.149  
4.131  
4.113

1.658  
1.456  
1.438  
1.420

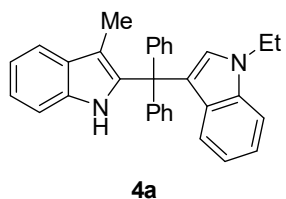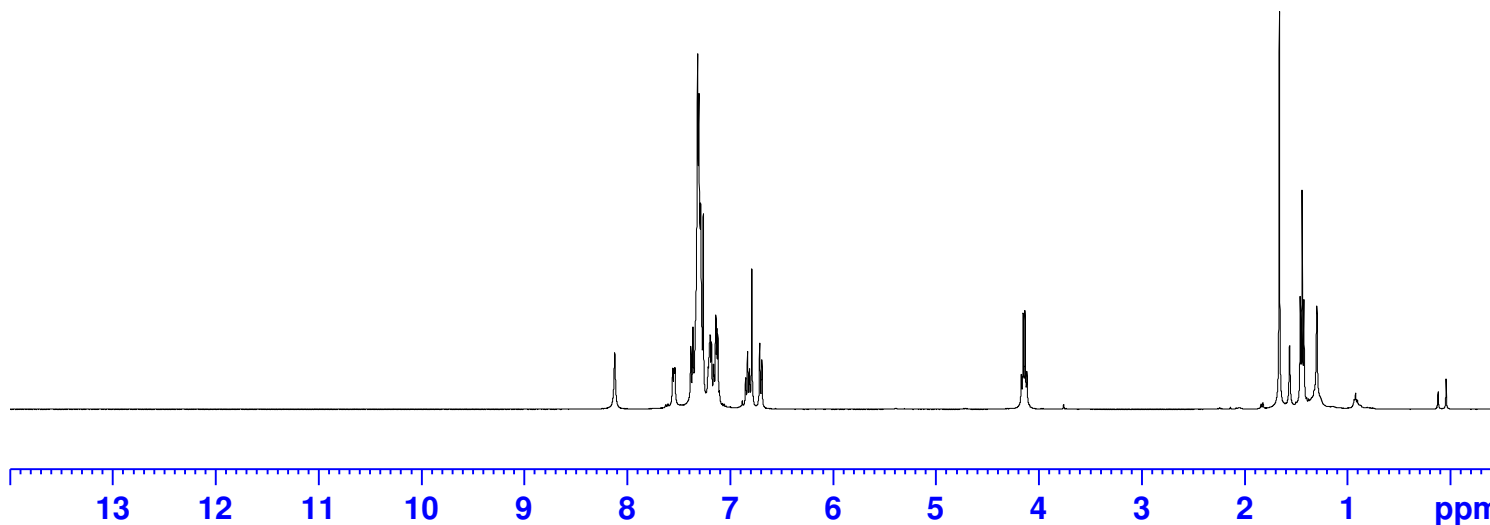

0.94  
1.02  
11.14  
4.17  
1.01  
0.98  
1.00

2.03

3.00  
3.01

ncc-2-60



Current Data Parameters  
NAME 20230917-400M-2  
EXPNO 18  
PROCNO 1

F2 - Acquisition Parameters  
Date\_ 20230916  
Time 14.18  
INSTRUM spect  
PROBHD 5 mm PADUL 13C  
PULPROG zgpg30  
TD 65536  
SOLVENT CDCl3  
NS 500  
DS 4  
SWH 24038.461 Hz  
FIDRES 0.366798 Hz  
AQ 1.3631488 sec  
RG 53.3  
DW 20.800 usec  
DE 6.50 usec  
TE 291.6 K  
D1 2.00000000 sec  
D11 0.03000000 sec  
TD0 1

=====  
CHANNEL f1  
NUC1 13C  
P1 9.80 usec  
PLW1 47.40000153 W  
SFO1 100.6379178 MHz

=====  
CHANNEL f2  
CPDPRG[2] waltz16  
NUC2 1H  
PCPD2 90.00 usec  
PLW2 23.00000000 W  
PLW12 0.30712000 W  
PLW13 0.24877000 W  
SFO2 400.1916008 MHz

F2 - Processing parameters  
SI 32768  
SF 100.6278499 MHz  
WDW EM  
SSB 0  
LB 1.00 Hz  
GB 0  
PC 1.40

144.54  
138.76  
137.02  
133.68  
130.29  
130.14  
128.96  
127.94  
127.72  
126.59  
122.14  
121.58  
121.18  
120.49  
119.31  
119.04  
118.26  
110.79  
109.51  
109.15  
77.47  
77.16  
76.84  
55.36  
41.14  
15.71  
10.25

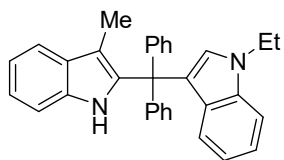

4a

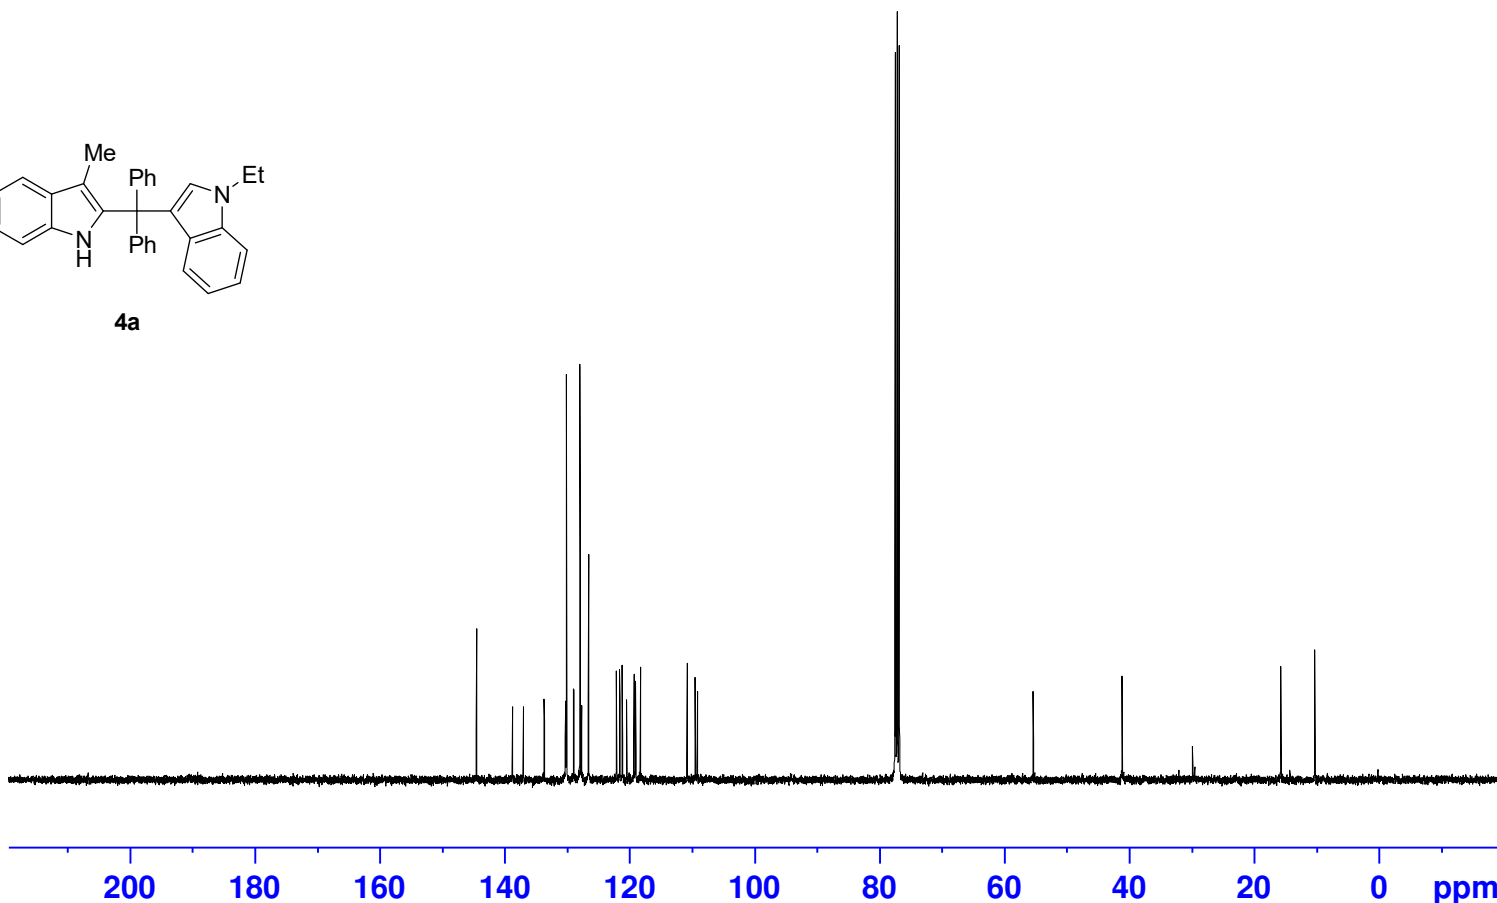

ncc-2-61

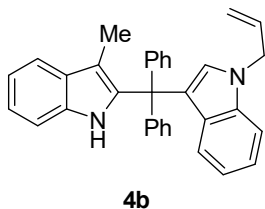

8.106  
7.558  
7.543  
7.538  
7.345  
7.320  
7.307  
7.291  
7.259  
7.218  
7.202  
7.194  
7.174  
7.144  
7.135  
7.109  
6.874  
6.857  
6.838  
6.820  
6.789  
6.716  
6.696  
6.031  
6.019  
6.006  
5.992  
5.977  
5.963  
5.951  
5.938  
5.205  
5.180  
5.068  
5.025  
4.708  
4.696

1.667



Current Data Parameters  
NAME 20230915-400M  
EXPNO 27  
PROCNO 1

F2 - Acquisition Parameters  
Date\_ 20230914  
Time 23.50  
INSTRUM spect  
PROBHD 5 mm PADUL 13C  
PULPROG zg30  
TD 65536  
SOLVENT CDC13  
NS 6  
DS 2  
SWH 8223.685 Hz  
FIDRES 0.125483 Hz  
AQ 3.9845889 sec  
RG 68.24  
DW 60.800 usec  
DE 6.50 usec  
TE 291.0 K  
D1 1.00000000 sec  
TD0 1

==== CHANNEL f1 =====  
NUC1 1H  
P1 9.90 usec  
PLW1 23.00000000 W  
SFO1 400.1924713 MHz

F2 - Processing parameters  
SI 65536  
SF 400.1900141 MHz  
WDW EM  
SSB 0  
LB 0.30 Hz  
GB 0  
PC 1.00

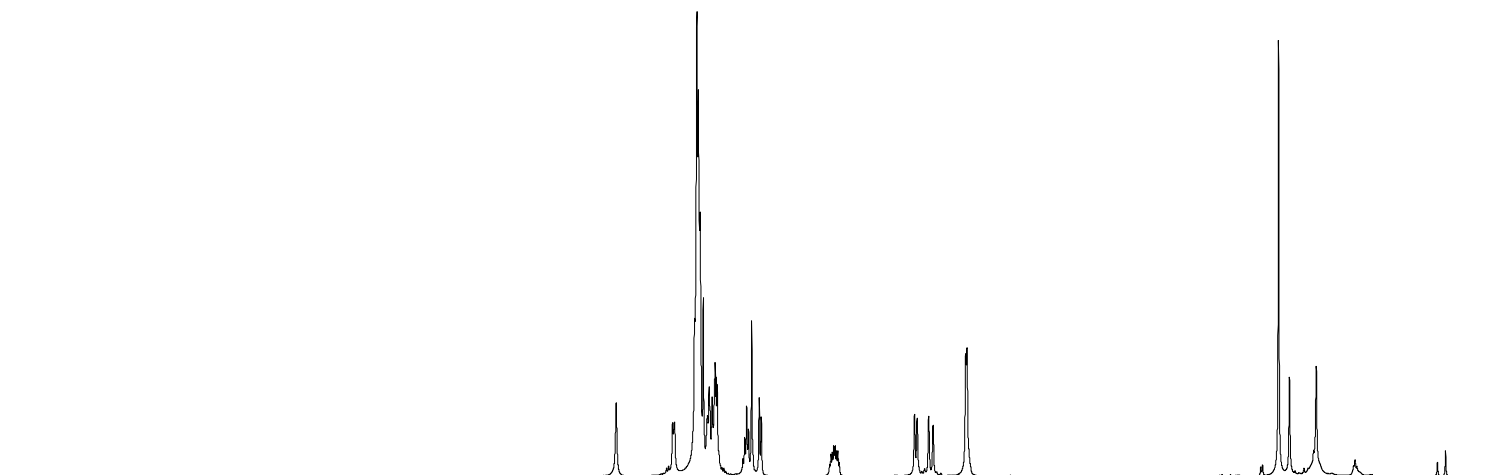

13 12 11 10 9 8 7 6 5 4 3 2 1 ppm

0.89  
1.02  
11.23  
4.18  
1.00  
0.99  
0.98  
1.01  
1.03  
1.00  
2.06  
3.00

ncc-2-61

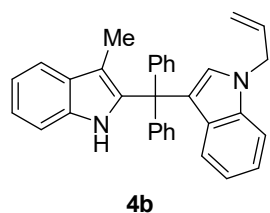

144.52  
138.59  
137.41  
133.70  
133.52  
130.29  
130.13  
129.70  
127.98  
127.79  
126.63  
122.11  
121.79  
121.22  
120.77  
119.55  
119.06  
118.28  
117.15  
110.81  
109.88  
109.25  
77.48  
77.16  
76.84

55.31  
48.93

10.26

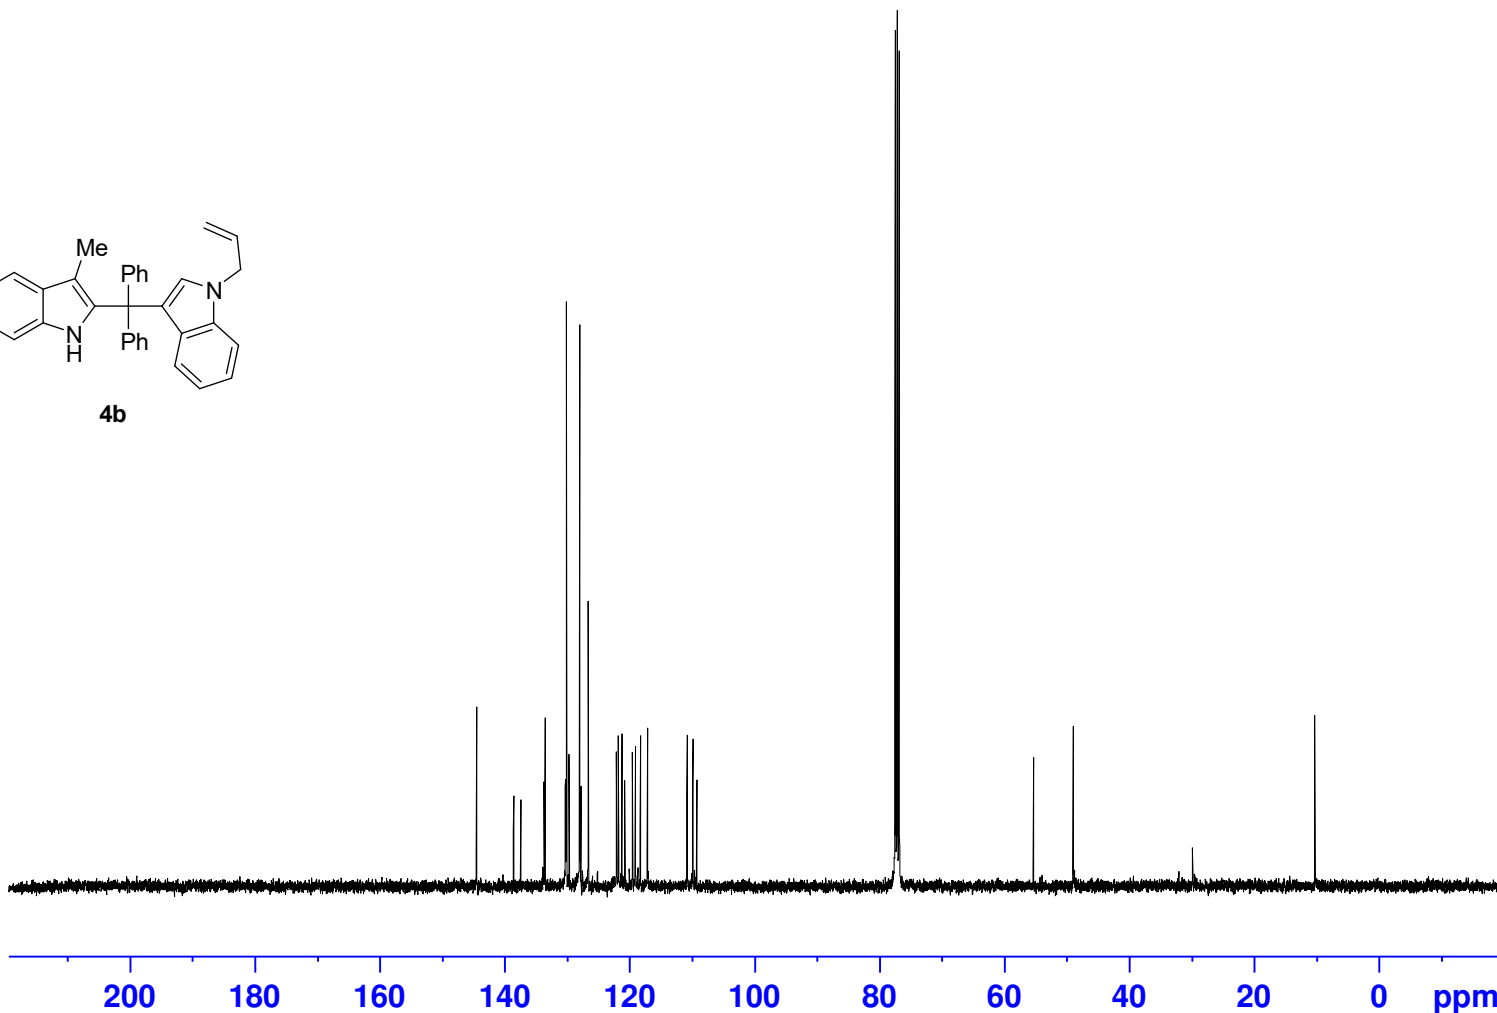

Current Data Parameters  
NAME 20230915-400M  
EXPNO 28  
PROCNO 1

F2 - Acquisition Parameters  
Date\_ 20230915  
Time 0.14  
INSTRUM spect  
PROBHD 5 mm PADUL 13C  
PULPROG zgpg30  
TD 65536  
SOLVENT CDC13  
NS 400  
DS 4  
SWH 24038.461 Hz  
FIDRES 0.366798 Hz  
AQ 1.3631488 sec  
RG 44.2  
DW 20.800 usec  
DE 6.50 usec  
TE 291.6 K  
D1 2.00000000 sec  
D11 0.03000000 sec  
TD0 1

==== CHANNEL f1 =====  
NUC1 13C  
P1 9.80 usec  
PLW1 47.40000153 W  
SFO1 100.6379178 MHz

==== CHANNEL f2 =====  
CPDPRG[2] waltz16  
NUC2 1H  
PCPD2 90.00 usec  
PLW2 23.00000000 W  
PLW12 0.30712000 W  
PLW13 0.24877000 W  
SFO2 400.1916008 MHz

F2 - Processing parameters  
SI 32768  
SF 100.6278507 MHz  
WDW EM  
SSB 0  
LB 1.00 Hz  
GB 0  
PC 1.40

ncc-3-14

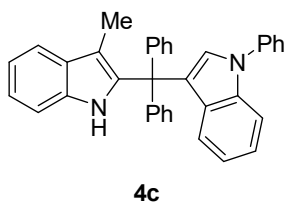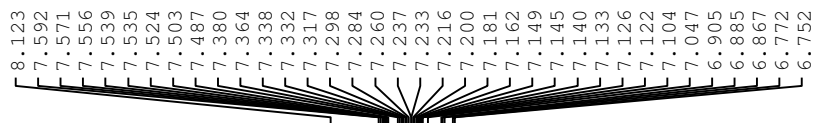

Current Data Parameters  
NAME 20231115-400M  
EXPNO 18  
PROCNO 1

F2 - Acquisition Parameters  
Date\_ 20231115  
Time 0.28  
INSTRUM spect  
PROBHD 5 mm PADUL 13C  
PULPROG zg30  
TD 65536  
SOLVENT CDCl3  
NS 8  
DS 2  
SWH 8223.685 Hz  
FIDRES 0.125483 Hz  
AQ 3.9845889 sec  
RG 100.49  
DW 60.800 usec  
DE 6.50 usec  
TE 294.1 K  
D1 1.00000000 sec  
TD0 1

==== CHANNEL f1 =====  
NUC1 1H  
P1 9.90 usec  
PLW1 23.00000000 W  
SFO1 400.1924713 MHz

F2 - Processing parameters  
SI 65536  
SF 400.1900139 MHz  
WDW EM  
SSB 0  
LB 0.30 Hz  
GB 0  
PC 1.00

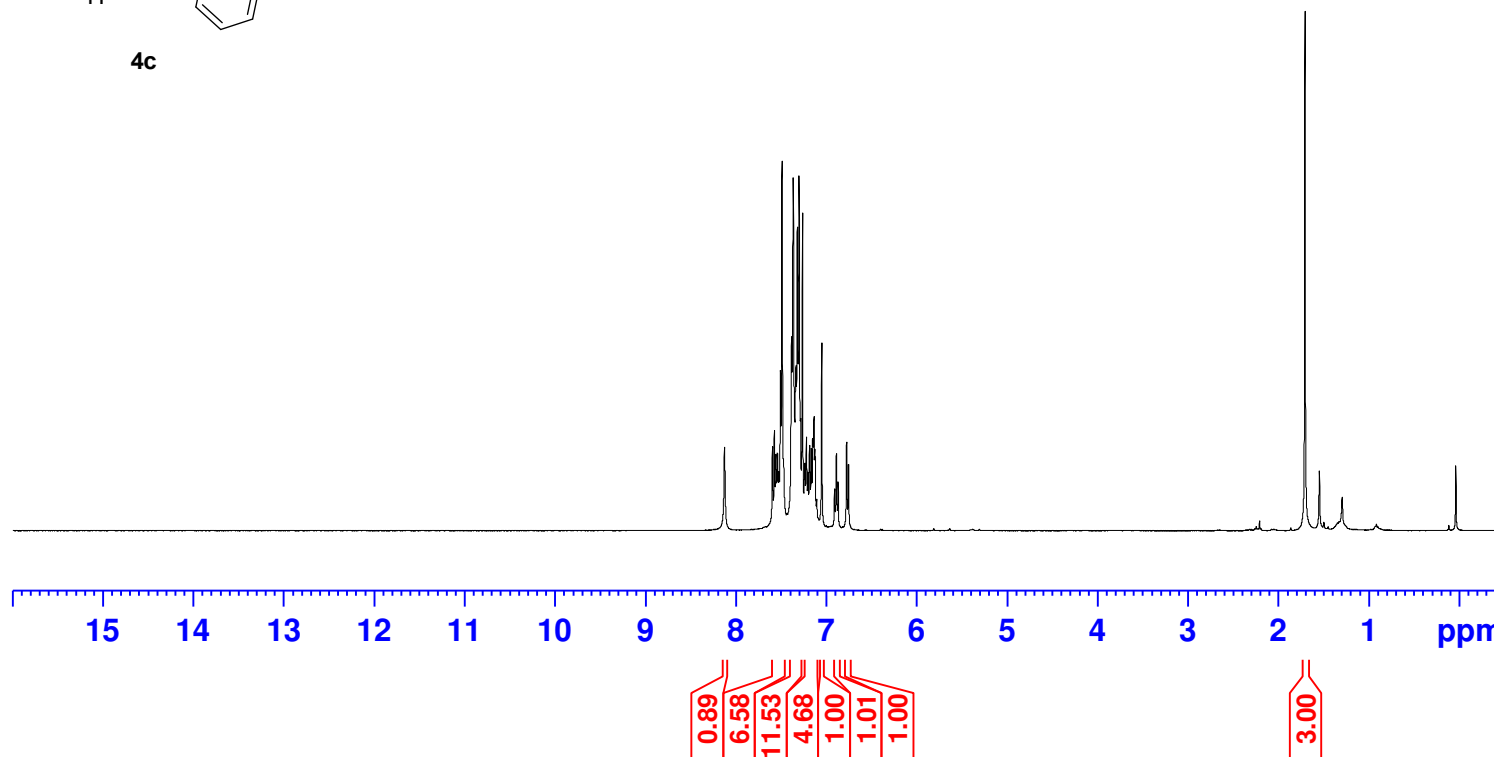



ncc-3-14

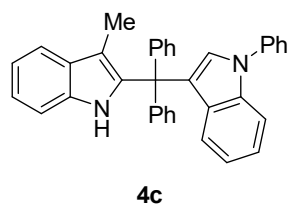

144.27  
139.57  
138.30  
137.18  
133.78  
130.32  
130.17  
129.71  
129.60  
128.50  
128.08  
126.77  
126.65  
124.62  
122.92  
122.59  
122.35  
121.34  
120.44  
119.14  
118.35  
110.82  
110.73  
109.42  
77.47  
77.16  
76.84

55.37

10.32

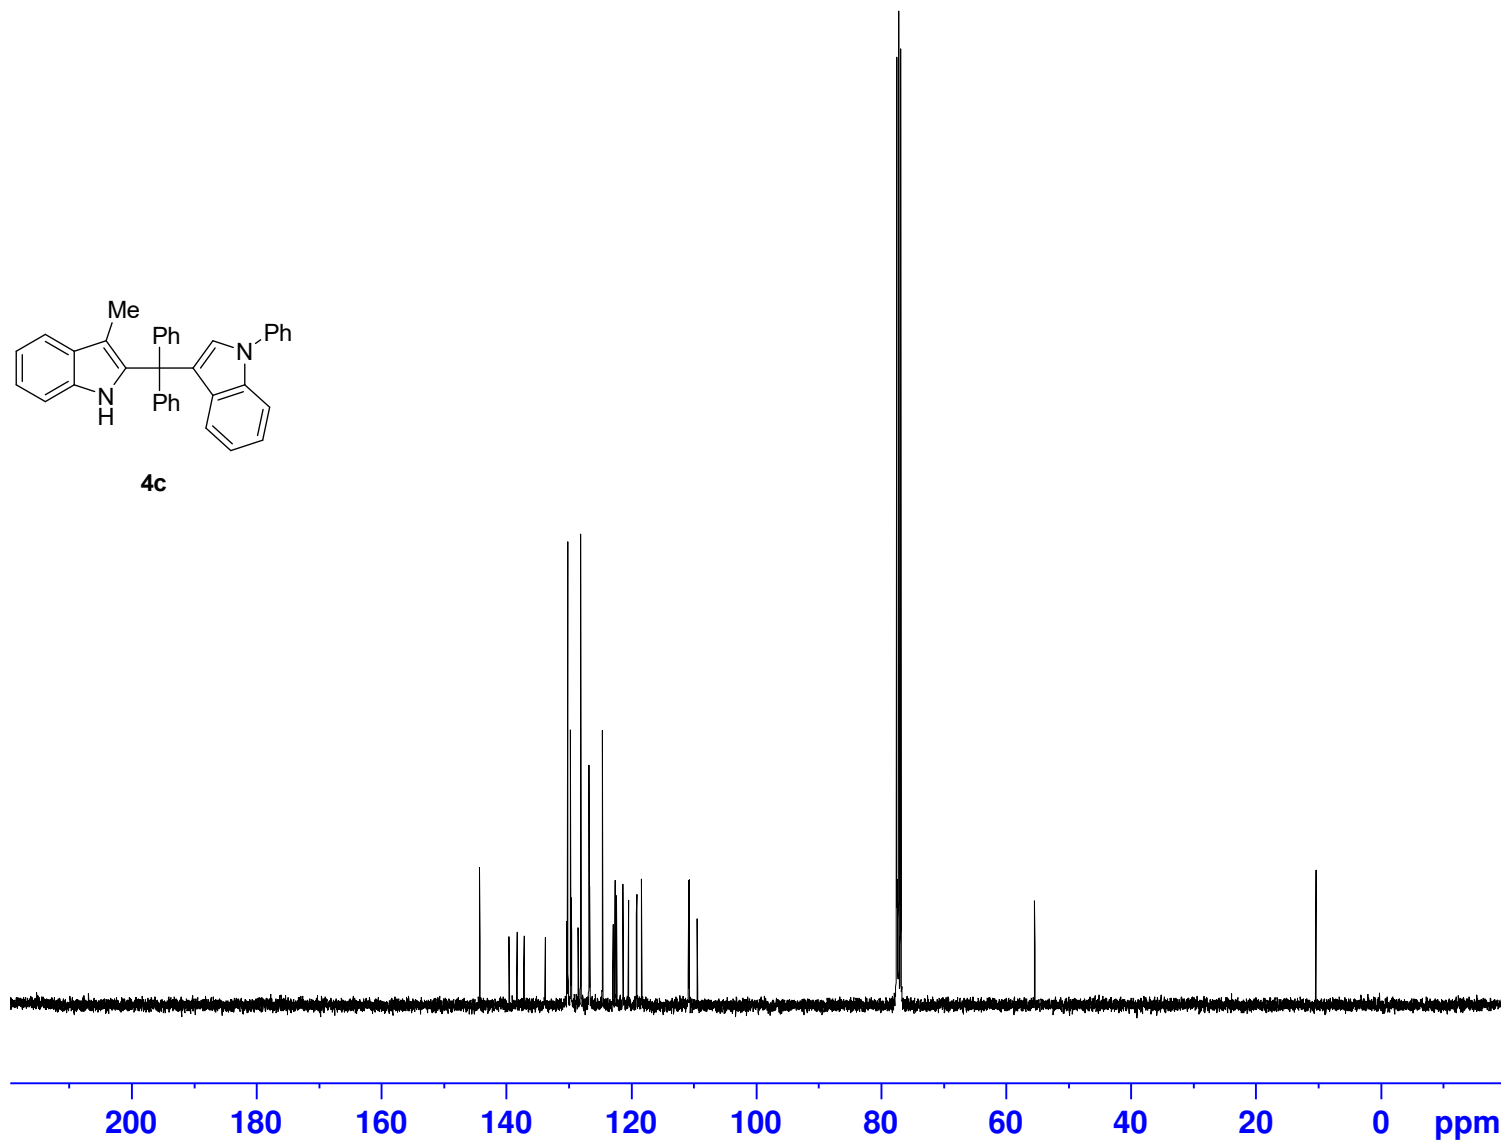

Current Data Parameters  
NAME 20231115-400M  
EXPNO 19  
PROCNO 1

F2 - Acquisition Parameters  
Date\_ 20231115  
Time 0.52  
INSTRUM spect  
PROBHD 5 mm PADUL 13C  
PULPROG zgpg30  
TD 65536  
SOLVENT CDC13  
NS 400  
DS 4  
SWH 24038.461 Hz  
FIDRES 0.366798 Hz  
AQ 1.3631488 sec  
RG 37.77  
DW 20.800 usec  
DE 6.50 usec  
TE 295.5 K  
D1 2.00000000 sec  
D11 0.03000000 sec  
TD0 1

==== CHANNEL f1 =====  
NUC1 13C  
P1 9.80 usec  
PLW1 47.40000153 W  
SFO1 100.6379178 MHz

==== CHANNEL f2 =====  
CPDPRG[2] waltz16  
NUC2 1H  
PCPD2 90.00 usec  
PLW2 23.00000000 W  
PLW12 0.30712000 W  
PLW13 0.24877000 W  
SFO2 400.1916008 MHz

F2 - Processing parameters  
SI 32768  
SF 100.6278477 MHz  
WDW EM  
SSB 0  
LB 1.00 Hz  
GB 0  
PC 1.40

NCC-2-73

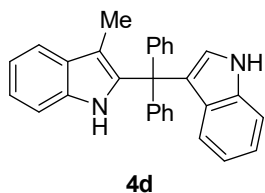

8.073  
7.991  
7.546  
7.534  
7.526  
7.374  
7.354  
7.291  
7.278  
7.270  
7.260  
7.170  
7.152  
7.131  
7.120  
7.111  
6.853  
6.833  
6.816  
6.706  
6.686

1.650



Current Data Parameters  
NAME 20231008-400M  
EXPNO 13  
PROCNO 1

F2 - Acquisition Parameters  
Date\_ 20231007  
Time 23.12  
INSTRUM spect  
PROBHD 5 mm PADUL 13C  
PULPROG zg30  
TD 65536  
SOLVENT CDC13  
NS 6  
DS 2  
SWH 8223.685 Hz  
FIDRES 0.125483 Hz  
AQ 3.9845889 sec  
RG 113.67  
DW 60.800 usec  
DE 6.50 usec  
TE 294.6 K  
D1 1.00000000 sec  
TD0 1

==== CHANNEL f1 =====  
NUC1 1H  
P1 9.90 usec  
PLW1 23.00000000 W  
SFO1 400.1924713 MHz

F2 - Processing parameters  
SI 65536  
SF 400.1900142 MHz  
WDW EM  
SSB 0  
LB 0.30 Hz  
GB 0  
PC 1.00

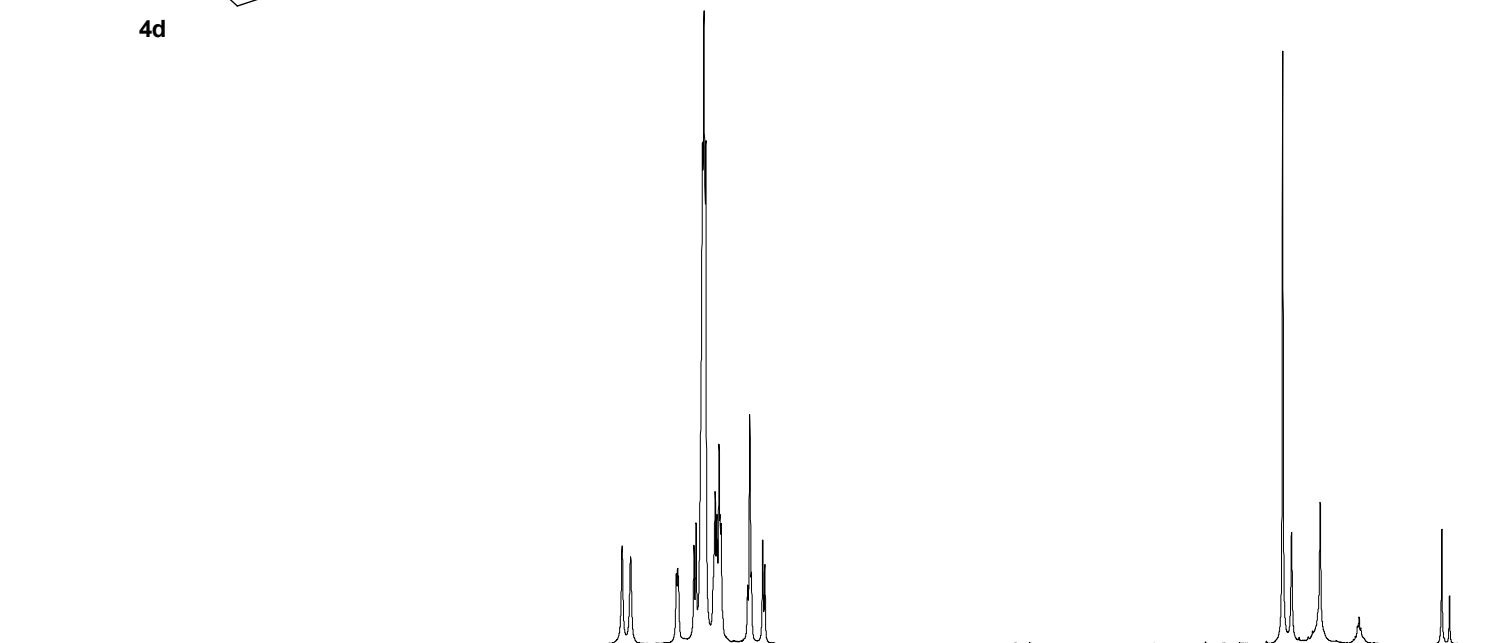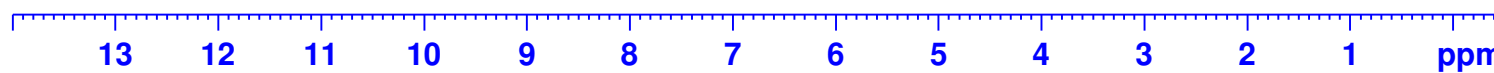

1.00  
0.97  
1.01  
11.74  
4.27  
2.01  
1.00  
3.00

NCC-2-73

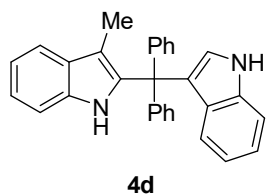

144.41  
138.48  
137.24  
133.75  
130.30  
130.13  
127.99  
127.17  
126.67  
125.92  
122.25  
122.17  
121.92  
121.27  
119.92  
119.11  
118.28  
111.35  
110.82  
109.33

77.47  
77.16  
76.84

55.33

10.26

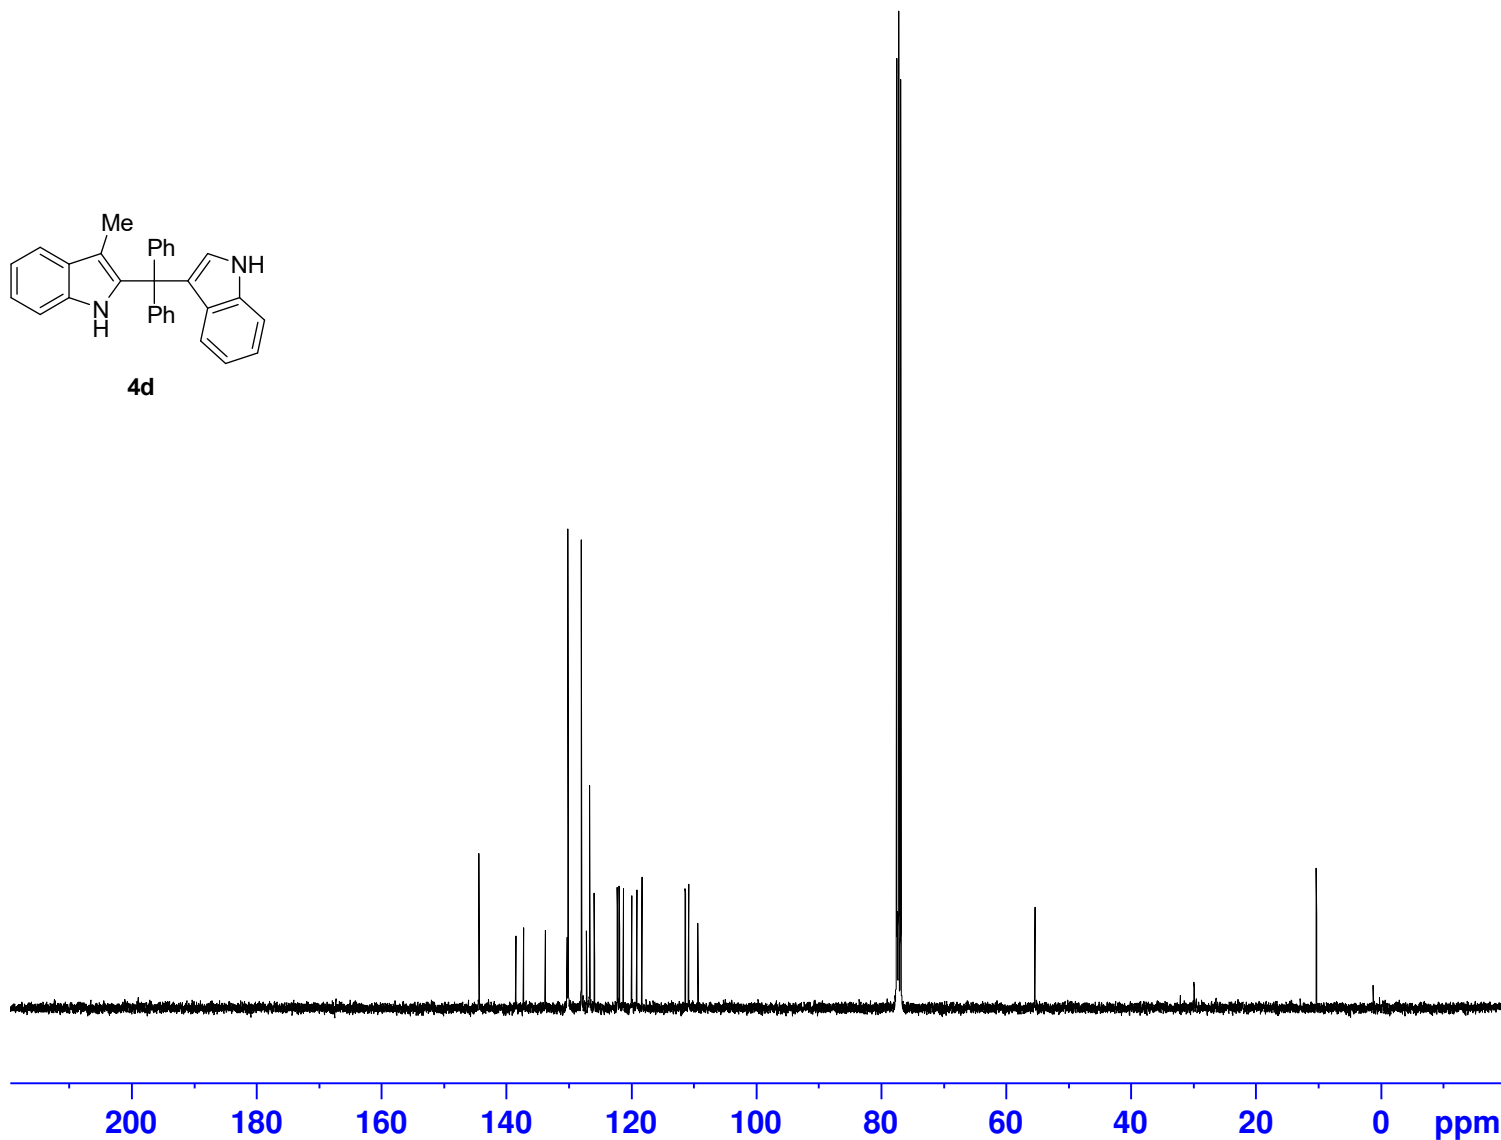

Current Data Parameters  
NAME 20231008-400M  
EXPNO 14  
PROCNO 1

F2 - Acquisition Parameters  
Date\_ 20231007  
Time 23.42  
INSTRUM spect  
PROBHD 5 mm PADUL 13C  
PULPROG zgpg30  
TD 65536  
SOLVENT CDCl3  
NS 500  
DS 4  
SWH 24038.461 Hz  
FIDRES 0.366798 Hz  
AQ 1.3631488 sec  
RG 50.16  
DW 20.800 usec  
DE 6.50 usec  
TE 295.1 K  
D1 2.00000000 sec  
D11 0.03000000 sec  
TD0 1

==== CHANNEL f1 =====  
NUC1 13C  
P1 9.80 usec  
PLW1 47.40000153 W  
SFO1 100.6379178 MHz

==== CHANNEL f2 =====  
CPDPRG[2] waltz16  
NUC2 1H  
PCPD2 90.00 usec  
PLW2 23.00000000 W  
PLW12 0.30712000 W  
PLW13 0.24877000 W  
SFO2 400.1916008 MHz

F2 - Processing parameters  
SI 32768  
SF 100.6278477 MHz  
WDW EM  
SSB 0  
LB 1.00 Hz  
GB 0  
PC 1.40

ncc-2-64

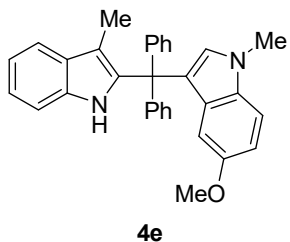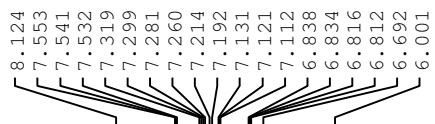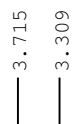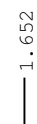

Current Data Parameters  
NAME 20230921-400M  
EXPNO 35  
PROCNO 1

F2 - Acquisition Parameters  
Date\_ 20230921  
Time 1.03  
INSTRUM spect  
PROBHD 5 mm PADUL 13C  
PULPROG zg30  
TD 65536  
SOLVENT CDC13  
NS 6  
DS 2  
SWH 8223.685 Hz  
FIDRES 0.125483 Hz  
AQ 3.9845889 sec  
RG 90.23  
DW 60.800 usec  
DE 6.50 usec  
TE 290.8 K  
D1 1.00000000 sec  
TD0 1

==== CHANNEL f1 =====  
NUC1 1H  
P1 9.90 usec  
PLW1 23.00000000 W  
SFO1 400.1924713 MHz

F2 - Processing parameters  
SI 65536  
SF 400.1900138 MHz  
WDW EM  
SSB 0  
LB 0.30 Hz  
GB 0  
PC 1.00

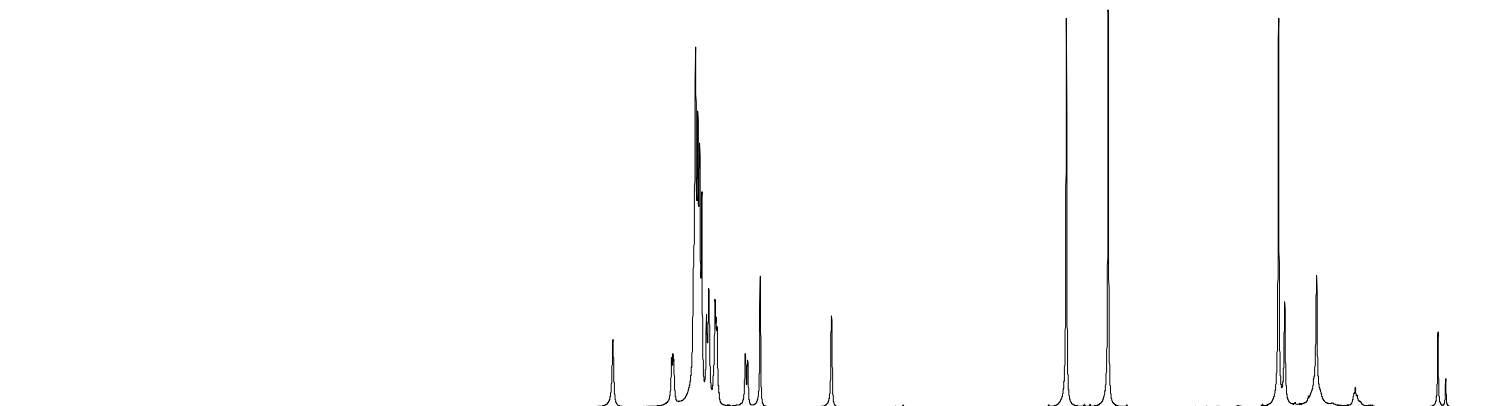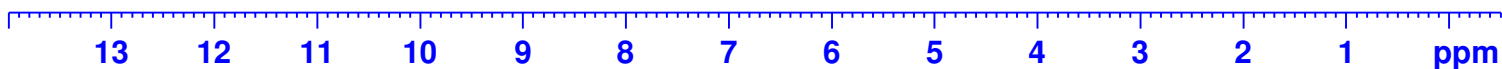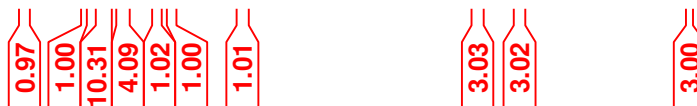

ncc-2-64

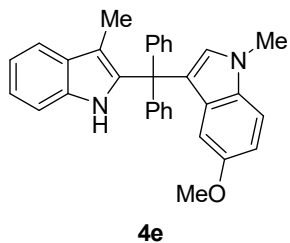

153.57  
144.41  
138.81  
133.72  
133.25  
130.88  
130.29  
130.16  
127.96  
127.74  
126.58  
121.20  
120.07  
119.06  
118.23  
112.37  
110.80  
110.20  
109.19  
102.98

77.47  
77.16  
76.84

55.43  
55.29

33.14

10.28



Current Data Parameters  
NAME 20230921-400M  
EXPNO 36  
PROCNO 1

F2 - Acquisition Parameters  
Date\_ 20230921  
Time 1.38  
INSTRUM spect  
PROBHD 5 mm PADUL 13C  
PULPROG zgpg30  
TD 65536  
SOLVENT CDC13  
NS 600  
DS 4  
SWH 24038.461 Hz  
FIDRES 0.366798 Hz  
AQ 1.3631488 sec  
RG 29.75  
DW 20.800 usec  
DE 6.50 usec  
TE 291.4 K  
D1 2.00000000 sec  
D11 0.03000000 sec  
TD0 1

==== CHANNEL f1 =====  
NUC1 13C  
P1 9.80 usec  
PLW1 47.40000153 W  
SFO1 100.6379178 MHz

==== CHANNEL f2 =====  
CPDPRG[2] waltz16  
NUC2 1H  
PCPD2 90.00 usec  
PLW2 23.00000000 W  
PLW12 0.30712000 W  
PLW13 0.24877000 W  
SFO2 400.1916008 MHz

F2 - Processing parameters  
SI 32768  
SF 100.6278492 MHz  
WDW EM  
SSB 0  
LB 1.00 Hz  
GB 0  
PC 1.40

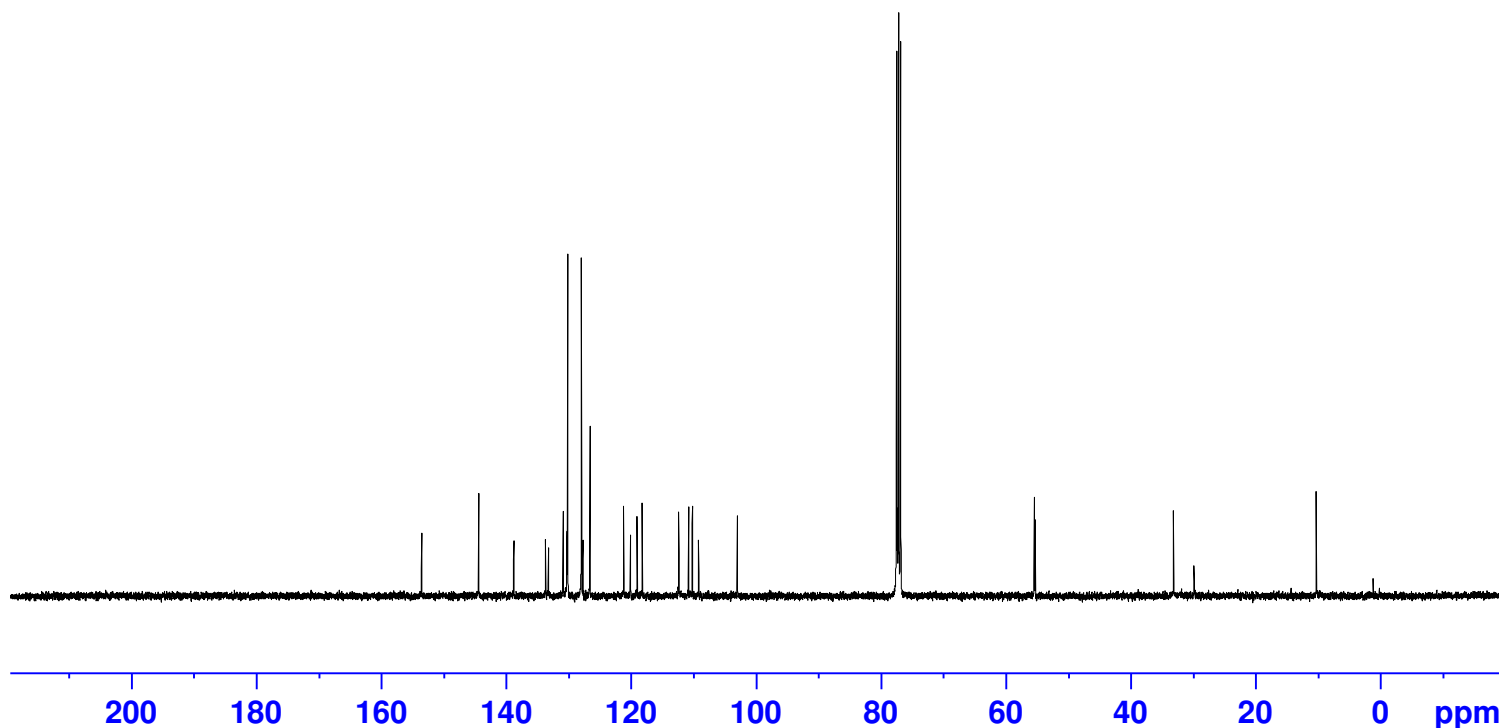

ncc-2-95



Current Data Parameters  
NAME 20231028-400M-2  
EXPNO 10  
PROCNO 1

F2 - Acquisition Parameters  
Date\_ 20231028  
Time 11.04  
INSTRUM spect  
PROBHD 5 mm PADUL 13C  
PULPROG zg30  
TD 65536  
SOLVENT CDC13  
NS 8  
DS 2  
SWH 8223.685 Hz  
FIDRES 0.125483 Hz  
AQ 3.9845889 sec  
RG 90.23  
DW 60.800 usec  
DE 6.50 usec  
TE 293.0 K  
D1 1.00000000 sec  
TD0 1

==== CHANNEL f1 =====  
NUC1 1H  
P1 9.90 usec  
PLW1 23.00000000 W  
SFO1 400.1924713 MHz

F2 - Processing parameters  
SI 65536  
SF 400.1900272 MHz  
WDW EM  
SSB 0  
LB 0.30 Hz  
GB 0  
PC 1.00

8.096  
7.506  
7.273  
7.228  
7.147  
7.097  
6.739  
6.556  
6.521  
6.500  
6.483  
3.832  
3.661  
1.626

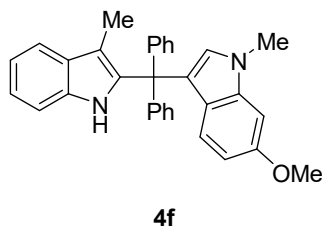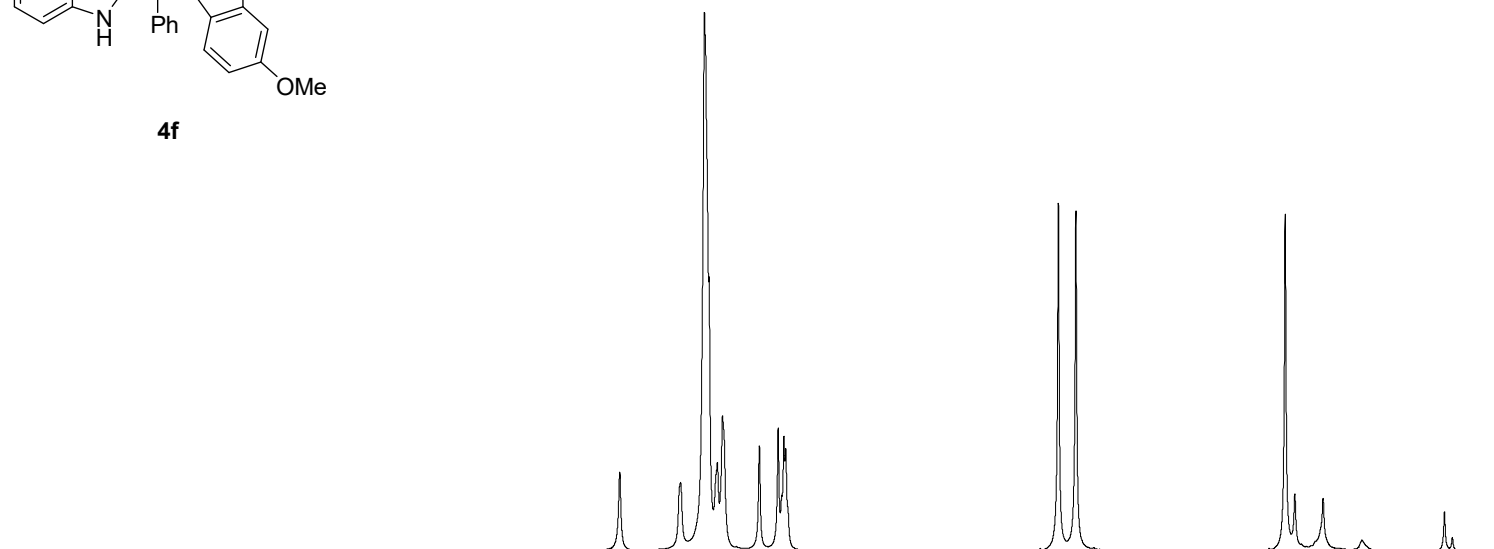

13 12 11 10 9 8 7 6 5 4 3 2 1 ppm

0.96  
1.01  
13.88  
1.01  
3.02  
3.05  
3.02  
3.00

ncc-2-95



Current Data Parameters  
NAME 20231028-400M-2  
EXPNO 11  
PROCNO 1

F2 - Acquisition Parameters  
Date\_ 20231028  
Time 11.34  
INSTRUM spect  
PROBHD 5 mm PADUL 13C  
PULPROG zgpg30  
TD 65536  
SOLVENT CDC13  
NS 500  
DS 4  
SWH 24038.461 Hz  
FIDRES 0.366798 Hz  
AQ 1.3631488 sec  
RG 53.3  
DW 20.800 usec  
DE 6.50 usec  
TE 293.1 K  
D1 2.00000000 sec  
D11 0.03000000 sec  
TD0 1

==== CHANNEL f1 =====  
NUC1 13C  
P1 9.80 usec  
PLW1 47.40000153 W  
SFO1 100.6379178 MHz

==== CHANNEL f2 =====  
CPDPRG[2] waltz16  
NUC2 1H  
PCPD2 90.00 usec  
PLW2 23.00000000 W  
PLW12 0.30712000 W  
PLW13 0.24877000 W  
SFO2 400.1916008 MHz

F2 - Processing parameters  
SI 32768  
SF 100.6278491 MHz  
WDW EM  
SSB 0  
LB 1.00 Hz  
GB 0  
PC 1.40

156.18  
144.43  
138.71  
138.64  
133.63  
130.21  
130.02  
129.44  
127.85  
126.53  
122.57  
121.81  
121.12  
120.54  
118.97  
118.18  
110.71  
109.17  
109.09  
92.69  
77.40  
77.09  
76.77  
55.57  
55.19  
32.90  
10.22

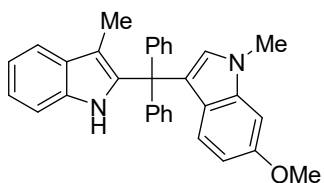

4f

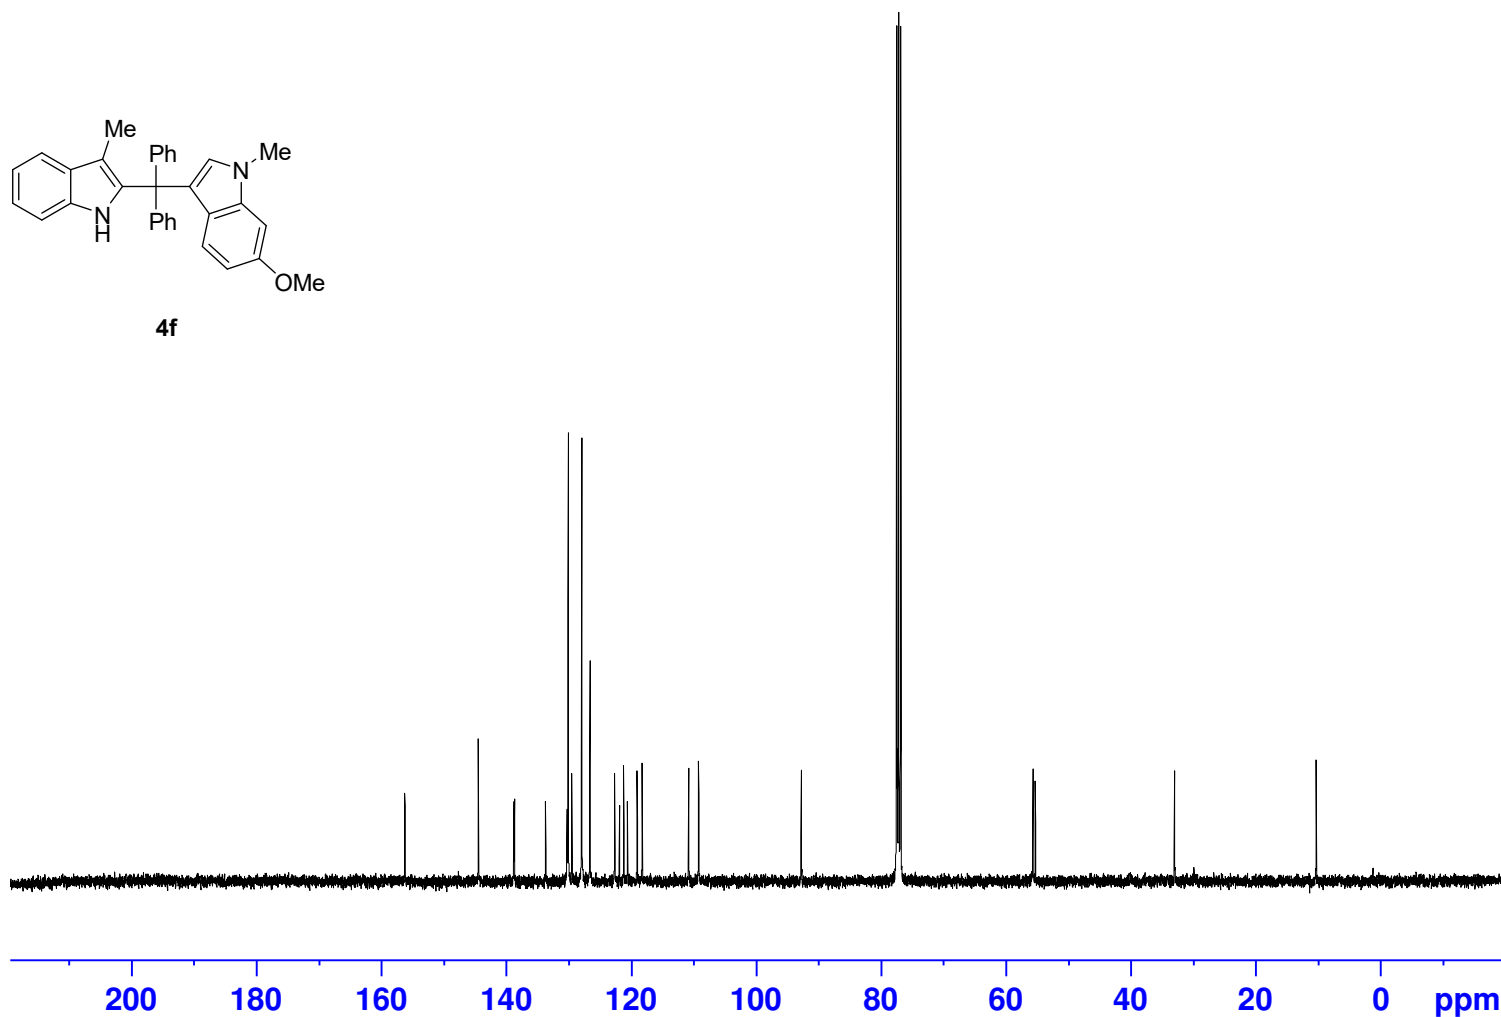

ncc-2-65



Current Data Parameters  
NAME 20230921-400M  
EXPNO 33  
PROCNO 1

F2 - Acquisition Parameters  
Date\_ 20230921  
Time 0.23  
INSTRUM spect  
PROBHD 5 mm PADUL 13C  
PULPROG zg30  
TD 65536  
SOLVENT CDC13  
NS 6  
DS 2  
SWH 8223.685 Hz  
FIDRES 0.125483 Hz  
AQ 3.9845889 sec  
RG 90.23  
DW 60.800 usec  
DE 6.50 usec  
TE 290.6 K  
D1 1.00000000 sec  
TD0 1

==== CHANNEL f1 =====  
NUC1 1H  
P1 9.90 usec  
PLW1 23.00000000 W  
SFO1 400.1924713 MHz

F2 - Processing parameters  
SI 65536  
SF 400.1900138 MHz  
WDW EM  
SSB 0  
LB 0.30 Hz  
GB 0  
PC 1.00

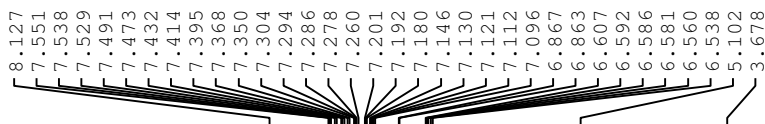

1.656

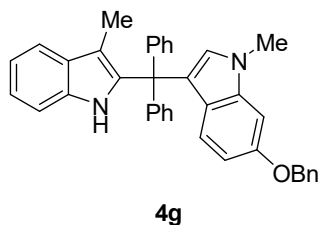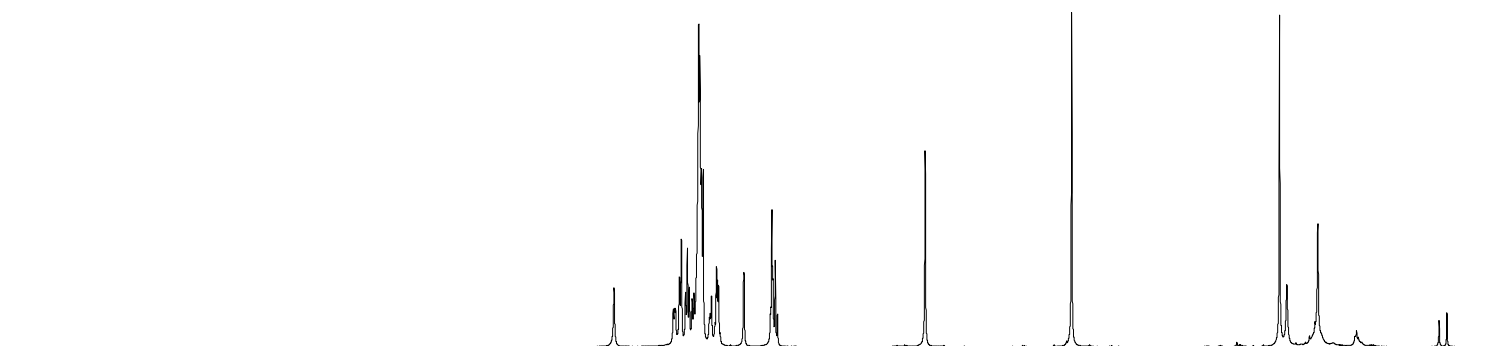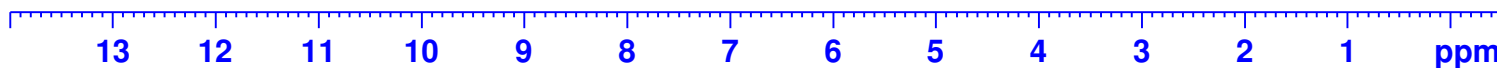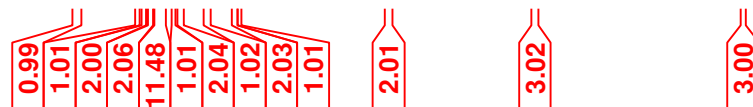



ncc-2-65



Current Data Parameters  
NAME 20230921-400M  
EXPNO 34  
PROCNO 1

F2 - Acquisition Parameters  
Date\_ 20230921  
Time 0.59  
INSTRUM spect  
PROBHD 5 mm PADUL 13C  
PULPROG zgpg30  
TD 65536  
SOLVENT CDCl3  
NS 600  
DS 4  
SWH 24038.461 Hz  
FIDRES 0.366798 Hz  
AQ 1.3631488 sec  
RG 29.75  
DW 20.800 usec  
DE 6.50 usec  
TE 291.3 K  
D1 2.00000000 sec  
D11 0.03000000 sec  
TD0 1

==== CHANNEL f1 =====  
NUC1 13C  
P1 9.80 usec  
PLW1 47.40000153 W  
SFO1 100.6379178 MHz

==== CHANNEL f2 =====  
CPDPRG[2] waltz16  
NUC2 1H  
PCPD2 90.00 usec  
PLW2 23.00000000 W  
PLW12 0.30712000 W  
PLW13 0.24877000 W  
SFO2 400.1916008 MHz

F2 - Processing parameters  
SI 32768  
SF 100.6278490 MHz  
WDW EM  
SSB 0  
LB 1.00 Hz  
GB 0  
PC 1.40

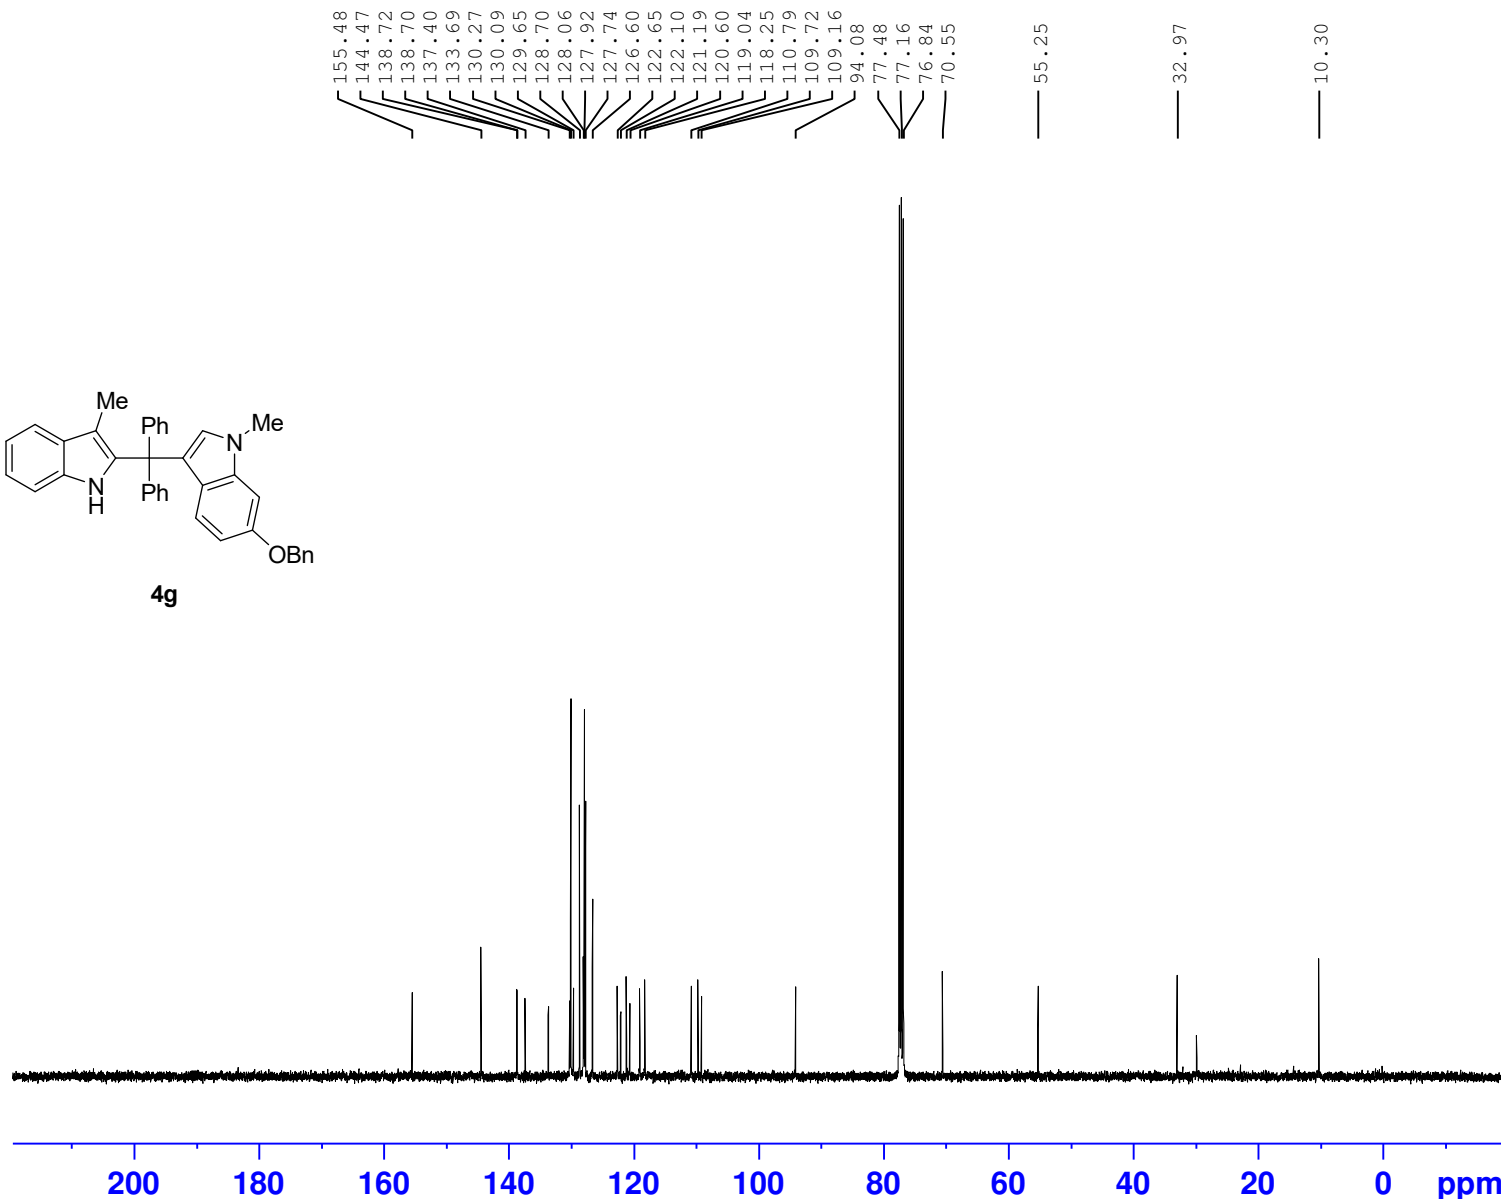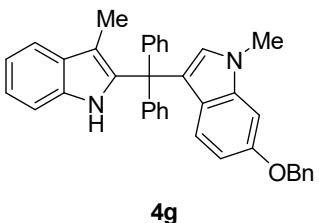

ncc-2-94



Current Data Parameters  
NAME 20231027-400M  
EXPNO 12  
PROCNO 1

F2 - Acquisition Parameters  
Date\_ 20231026  
Time 22.57  
INSTRUM spect  
PROBHD 5 mm PADUL 13C  
PULPROG zg30  
TD 65536  
SOLVENT CDC13  
NS 8  
DS 2  
SWH 8223.685 Hz  
FIDRES 0.125483 Hz  
AQ 3.9845889 sec  
RG 90.23  
DW 60.800 usec  
DE 6.50 usec  
TE 292.3 K  
D1 1.00000000 sec  
TD0 1

==== CHANNEL f1 =====  
NUC1 1H  
P1 9.90 usec  
PLW1 23.00000000 W  
SFO1 400.1924713 MHz

F2 - Processing parameters  
SI 65536  
SF 400.1900139 MHz  
WDW EM  
SSB 0  
LB 0.30 Hz  
GB 0  
PC 1.00

7.975  
7.543  
7.527  
7.486  
7.289  
7.259  
7.213  
7.196  
7.159  
7.141  
7.131  
7.121  
6.926  
6.905  
6.712  
6.512  
6.490

3.712

1.644

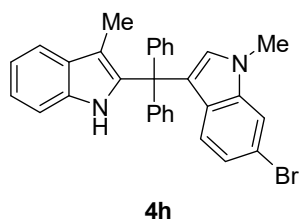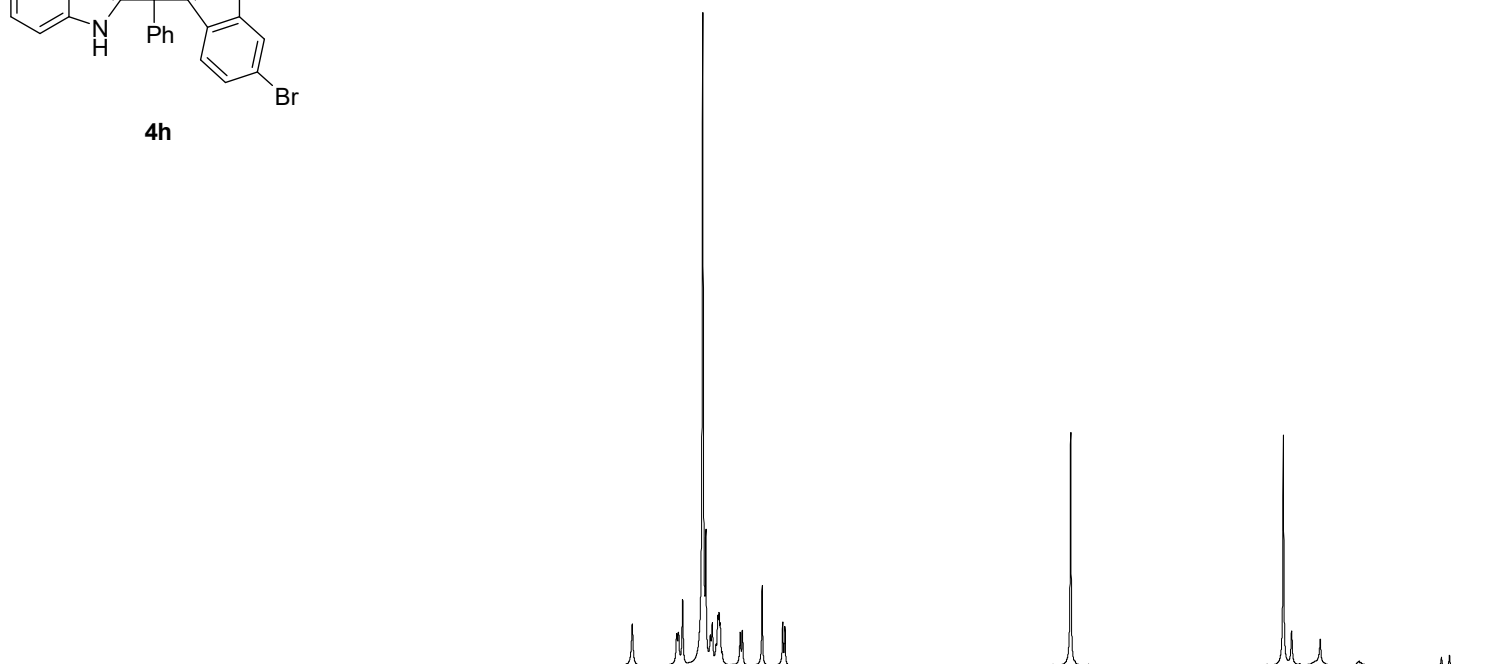

13 12 11 10 9 8 7 6 5 4 3 2 1 ppm

0.86  
2.03  
10.84  
3.11  
1.02  
1.00  
1.01

3.05

3.00

ncc-2-94

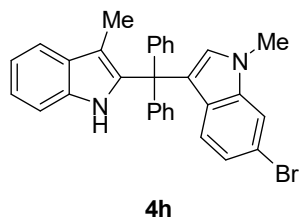

144.29  
138.79  
138.17  
133.71  
131.04  
130.26  
130.05  
128.06  
126.79  
126.51  
123.19  
122.69  
121.39  
120.77  
119.20  
118.32  
115.63  
112.55  
110.82  
109.35

77.47  
77.16  
76.84

55.15

33.07

10.27

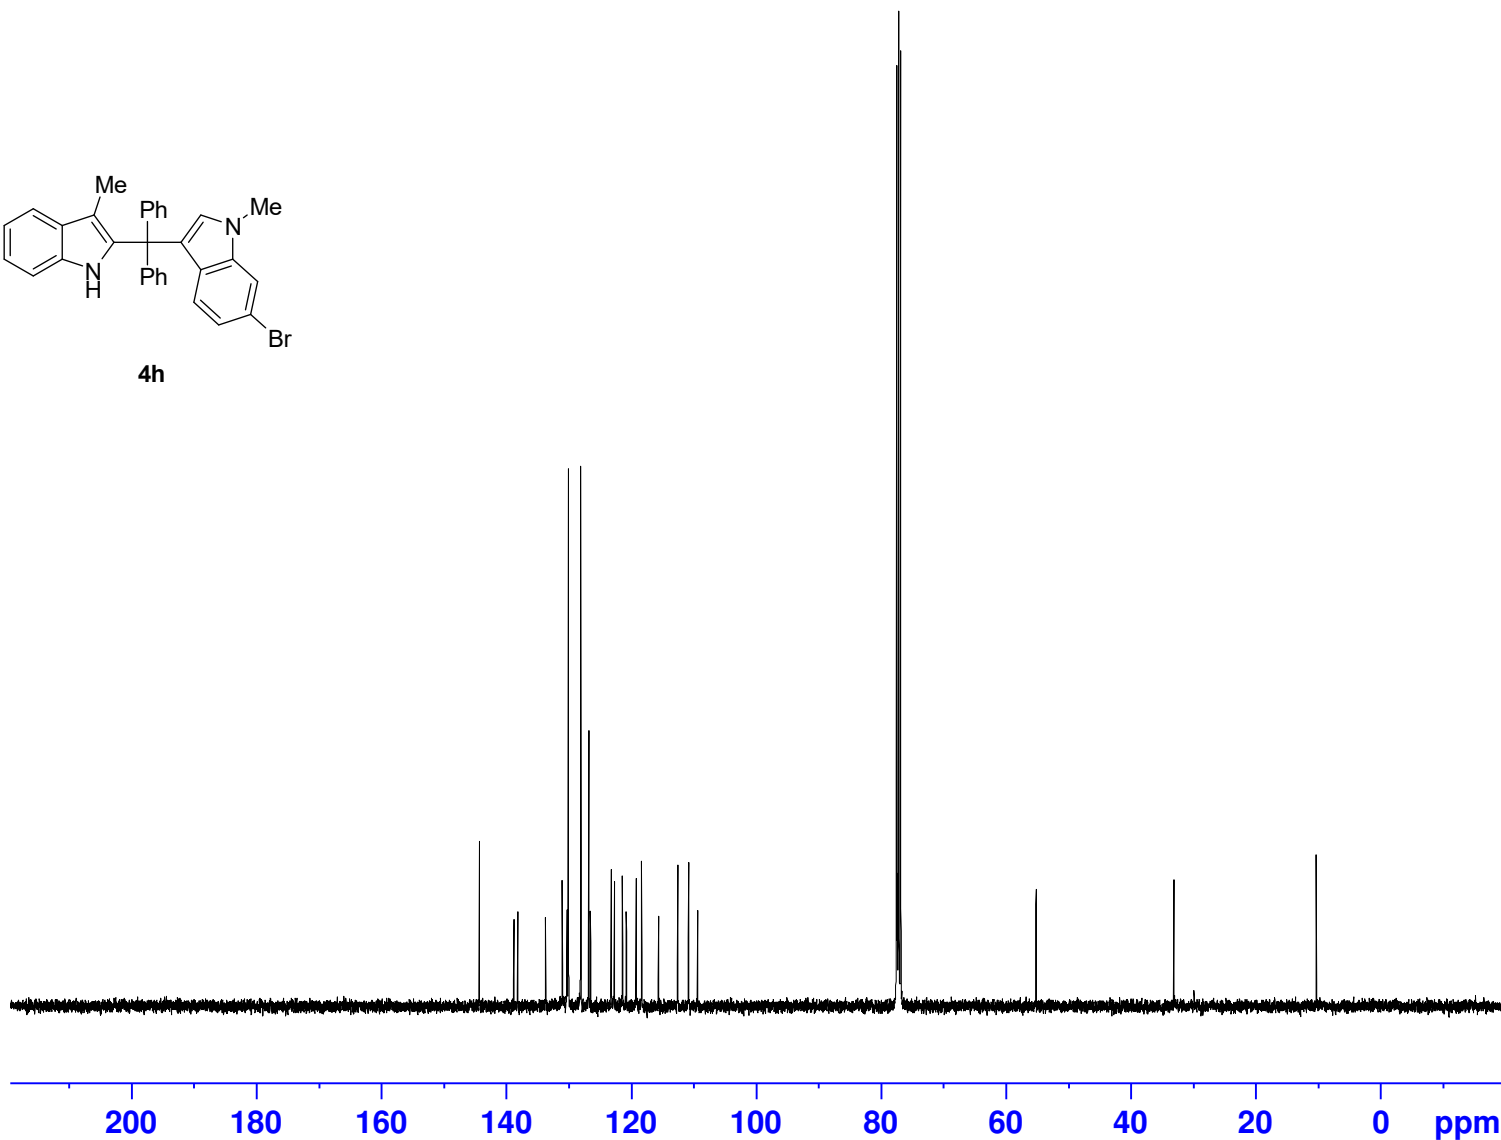

Current Data Parameters  
NAME 20231027-400M  
EXPNO 13  
PROCNO 1

F2 - Acquisition Parameters  
Date\_ 20231026  
Time 23.21  
INSTRUM spect  
PROBHD 5 mm PADUL 13C  
PULPROG zgpg30  
TD 65536  
SOLVENT CDC13  
NS 400  
DS 4  
SWH 24038.461 Hz  
FIDRES 0.366798 Hz  
AQ 1.3631488 sec  
RG 35.06  
DW 20.800 usec  
DE 6.50 usec  
TE 292.5 K  
D1 2.00000000 sec  
D11 0.03000000 sec  
TD0 1

==== CHANNEL f1 =====  
NUC1 13C  
P1 9.80 usec  
PLW1 47.40000153 W  
SFO1 100.6379178 MHz

==== CHANNEL f2 =====  
CPDPRG[2] waltz16  
NUC2 1H  
PCPD2 90.00 usec  
PLW2 23.00000000 W  
PLW12 0.30712000 W  
PLW13 0.24877000 W  
SFO2 400.1916008 MHz

F2 - Processing parameters  
SI 32768  
SF 100.6278491 MHz  
WDW EM  
SSB 0  
LB 1.00 Hz  
GB 0  
PC 1.40

ncc-2-93



Current Data Parameters  
NAME 20231027-400M  
EXPNO 10  
PROCNO 1

F2 - Acquisition Parameters  
Date\_ 20231026  
Time 22.28  
INSTRUM spect  
PROBHD 5 mm PADUL 13C  
PULPROG zg30  
TD 65536  
SOLVENT CDC13  
NS 8  
DS 2  
SWH 8223.685 Hz  
FIDRES 0.125483 Hz  
AQ 3.9845889 sec  
RG 90.23  
DW 60.800 usec  
DE 6.50 usec  
TE 291.7 K  
D1 1.00000000 sec  
TD0 1

==== CHANNEL f1 =====  
NUC1 1H  
P1 9.90 usec  
PLW1 23.00000000 W  
SFO1 400.1924713 MHz

F2 - Processing parameters  
SI 65536  
SF 400.1900138 MHz  
WDW EM  
SSB 0  
LB 0.30 Hz  
GB 0  
PC 1.00

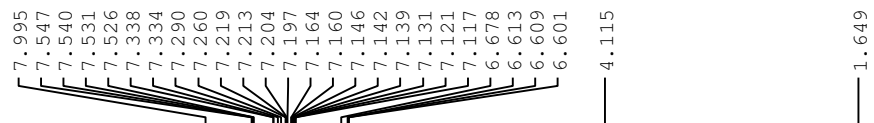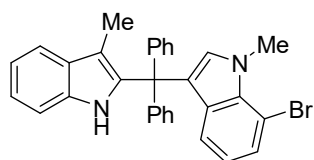

4i

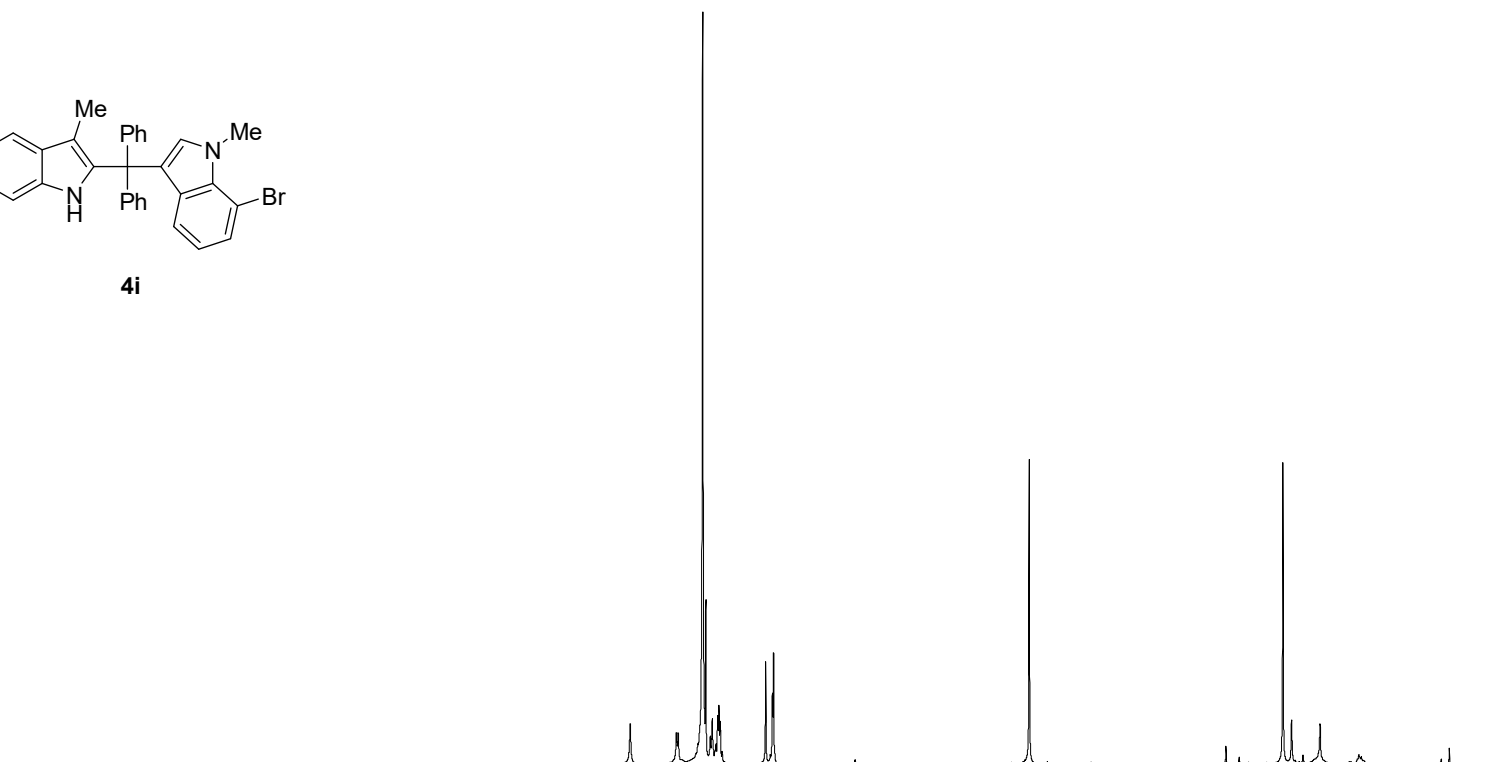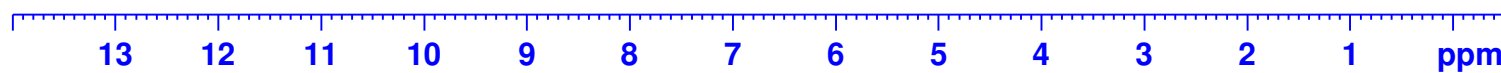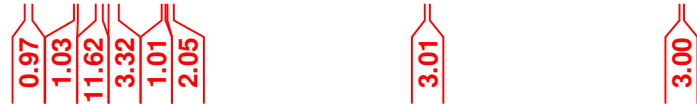

ncc-2-93



Current Data Parameters  
NAME 20231027-400M  
EXPNO 11  
PROCNO 1

F2 - Acquisition Parameters  
Date\_ 20231026  
Time 22.52  
INSTRUM spect  
PROBHD 5 mm PADUL 13C  
PULPROG zgpg30  
TD 65536  
SOLVENT CDC13  
NS 400  
DS 4  
SWH 24038.461 Hz  
FIDRES 0.366798 Hz  
AQ 1.3631488 sec  
RG 35.06  
DW 20.800 usec  
DE 6.50 usec  
TE 292.7 K  
D1 2.00000000 sec  
D11 0.03000000 sec  
TD0 1

==== CHANNEL f1 =====  
NUC1 13C  
P1 9.80 usec  
PLW1 47.40000153 W  
SFO1 100.6379178 MHz

==== CHANNEL f2 =====  
CPDPRG[2] waltz16  
NUC2 1H  
PCPD2 90.00 usec  
PLW2 23.00000000 W  
PLW12 0.30712000 W  
PLW13 0.24877000 W  
SFO2 400.1916008 MHz

F2 - Processing parameters  
SI 32768  
SF 100.6278491 MHz  
WDW EM  
SSB 0  
LB 1.00 Hz  
GB 0  
PC 1.40

144.15  
138.12  
134.33  
133.70  
133.61  
130.61  
130.27  
130.09  
128.06  
126.90  
126.78  
121.47  
121.36  
120.53  
120.13  
119.17  
118.33  
110.82  
109.37  
103.96  
77.47  
77.16  
76.84  
55.16  
37.20  
10.29

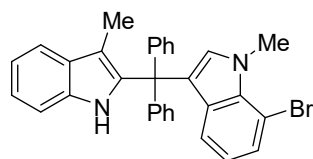

4i

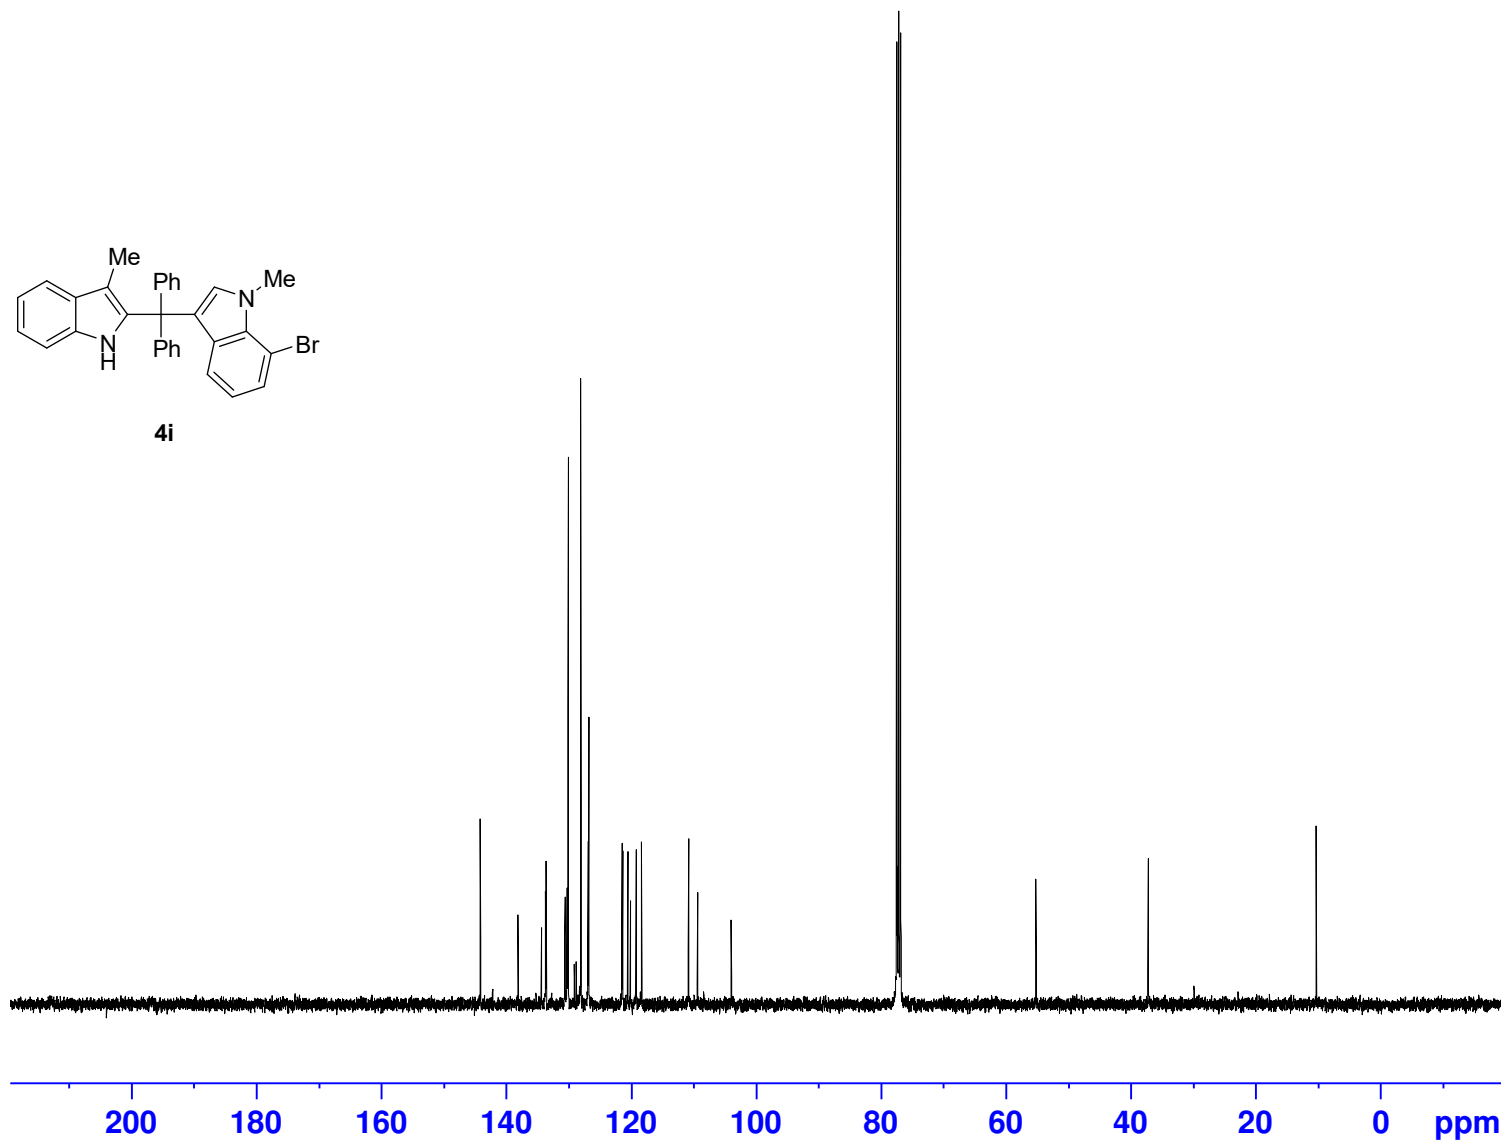

NCC-3-7



Current Data Parameters  
NAME 20231111-400M  
EXPNO 8  
PROCNO 1

F2 - Acquisition Parameters  
Date\_ 20231110  
Time 22.24  
INSTRUM spect  
PROBHD 5 mm PADUL 13C  
PULPROG zg30  
TD 65536  
SOLVENT CDC13  
NS 6  
DS 2  
SWH 8223.685 Hz  
FIDRES 0.125483 Hz  
AQ 3.9845889 sec  
RG 90.23  
DW 60.800 usec  
DE 6.50 usec  
TE 292.4 K  
D1 1.00000000 sec  
TD0 1

==== CHANNEL f1 =====  
NUC1 1H  
P1 9.90 usec  
PLW1 23.00000000 W  
SFO1 400.1924713 MHz

F2 - Processing parameters  
SI 65536  
SF 400.1900139 MHz  
WDW EM  
SSB 0  
LB 0.30 Hz  
GB 0  
PC 1.00

8.132  
7.551  
7.539  
7.531  
7.304  
7.293  
7.277  
7.260  
7.189  
7.178  
7.130  
7.120  
7.112  
6.878  
6.861  
6.698  
6.678  
6.660  
6.587  
6.543  
6.523

4.011

2.803

1.661

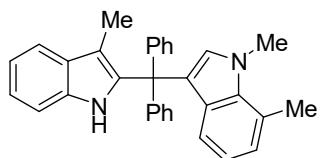

4j

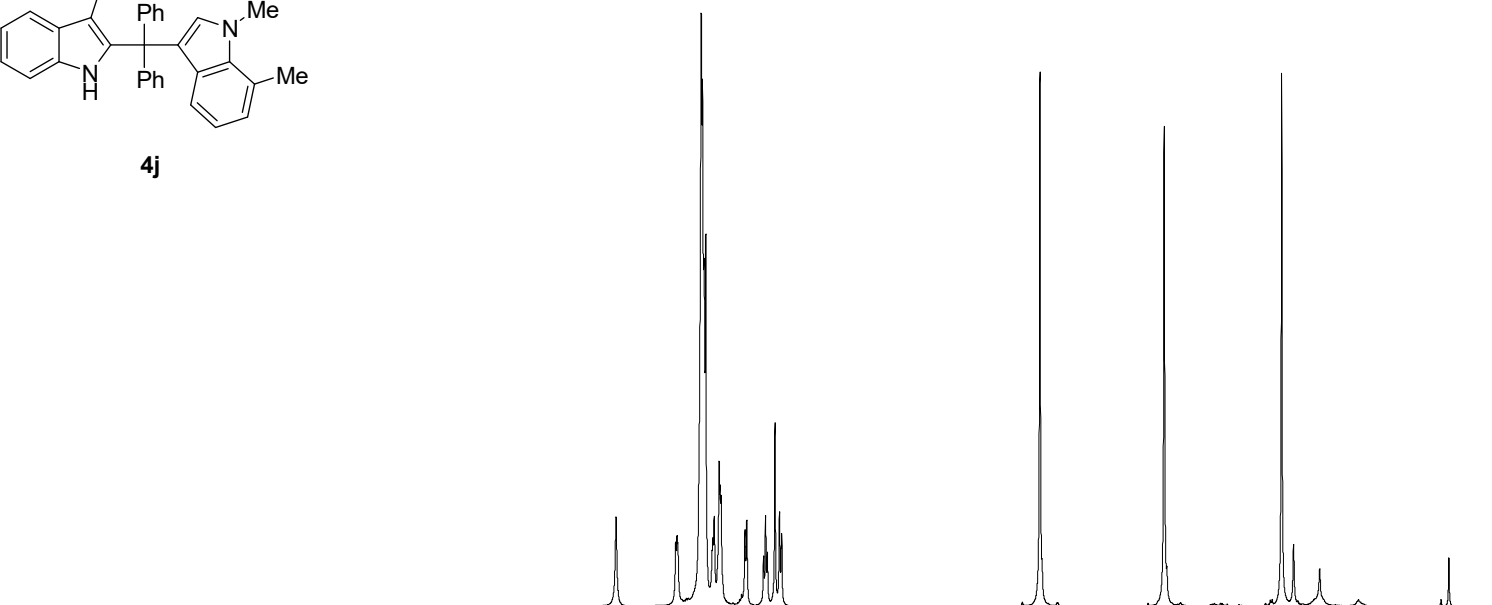

13 12 11 10 9 8 7 6 5 4 3 2 1 ppm

0.98  
1.01  
10.12  
3.04  
1.01  
1.02  
0.99  
0.98

3.02

3.03

3.00

NCC-3-7



Current Data Parameters  
NAME 20231111-400M  
EXPNO 9  
PROCNO 1

F2 - Acquisition Parameters  
Date\_ 20231110  
Time 22.54  
INSTRUM spect  
PROBHD 5 mm PADUL 13C  
PULPROG zgpg30  
TD 65536  
SOLVENT CDC13  
NS 500  
DS 4  
SWH 24038.461 Hz  
FIDRES 0.366798 Hz  
AQ 1.3631488 sec  
RG 37.77  
DW 20.800 usec  
DE 6.50 usec  
TE 293.1 K  
D1 2.00000000 sec  
D11 0.03000000 sec  
TD0 1

==== CHANNEL f1 =====  
NUC1 13C  
P1 9.80 usec  
PLW1 47.40000153 W  
SFO1 100.6379178 MHz

==== CHANNEL f2 =====  
CPDPRG[2] waltz16  
NUC2 1H  
PCPD2 90.00 usec  
PLW2 23.00000000 W  
PLW12 0.30712000 W  
PLW13 0.24877000 W  
SFO2 400.1916008 MHz

F2 - Processing parameters  
SI 32768  
SF 100.6278492 MHz  
WDW EM  
SSB 0  
LB 1.00 Hz  
GB 0  
PC 1.40

144.41  
138.76  
136.82  
133.68  
132.37  
130.27  
130.14  
128.51  
127.92  
126.57  
124.49  
121.34  
121.16  
120.24  
120.05  
119.58  
119.02  
118.24  
110.79  
109.12  
  
77.47  
77.16  
76.84  
  
55.26  
  
37.09  
  
20.01  
  
10.33

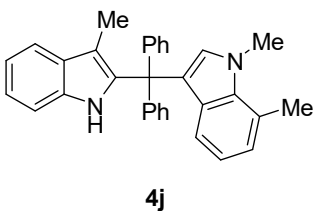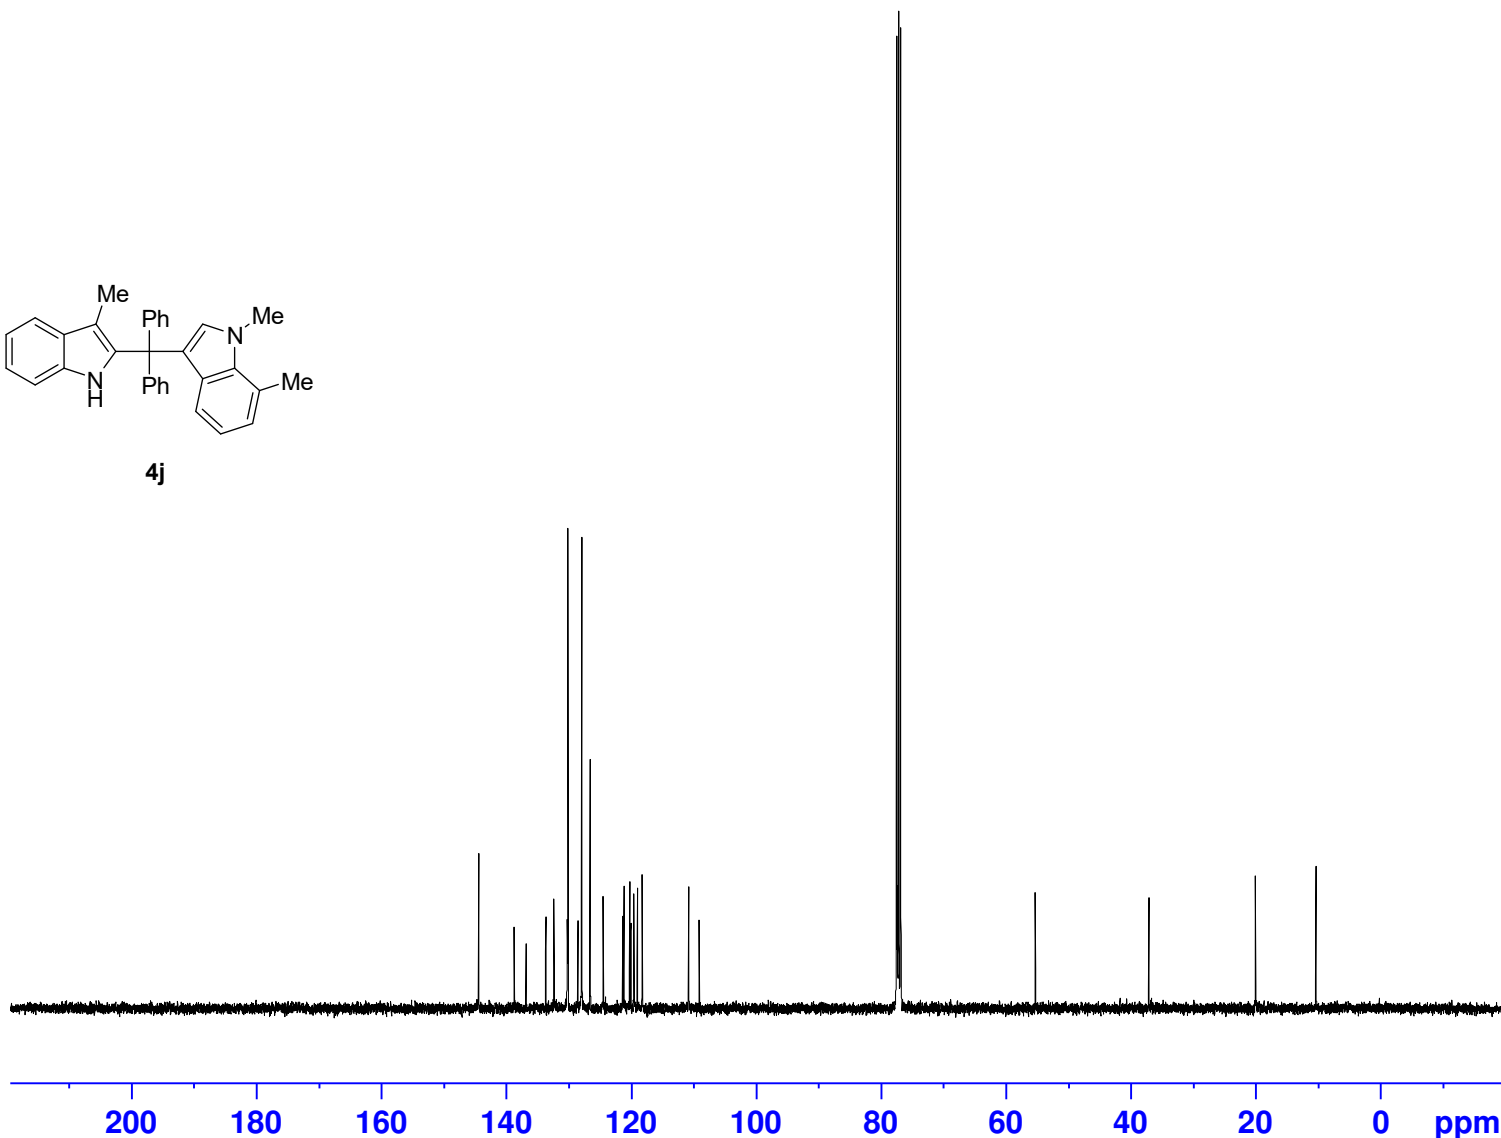

ncc-2-89-2

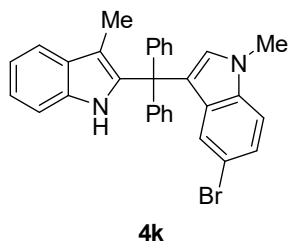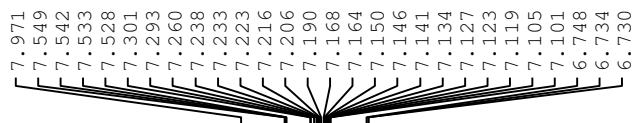

3.720

1.654



Current Data Parameters  
NAME 20231101-400M  
EXPNO 25  
PROCNO 1

F2 - Acquisition Parameters  
Date\_ 20231031  
Time 23.18  
INSTRUM spect  
PROBHD 5 mm PADUL 13C  
PULPROG zg30  
TD 65536  
SOLVENT CDC13  
NS 8  
DS 2  
SWH 8223.685 Hz  
FIDRES 0.125483 Hz  
AQ 3.9845889 sec  
RG 113.67  
DW 60.800 usec  
DE 6.50 usec  
TE 292.4 K  
D1 1.00000000 sec  
TD0 1

==== CHANNEL f1 =====  
NUC1 1H  
P1 9.90 usec  
PLW1 23.00000000 W  
SFO1 400.1924713 MHz

F2 - Processing parameters  
SI 65536  
SF 400.1900139 MHz  
WDW EM  
SSB 0  
LB 0.30 Hz  
GB 0  
PC 1.00

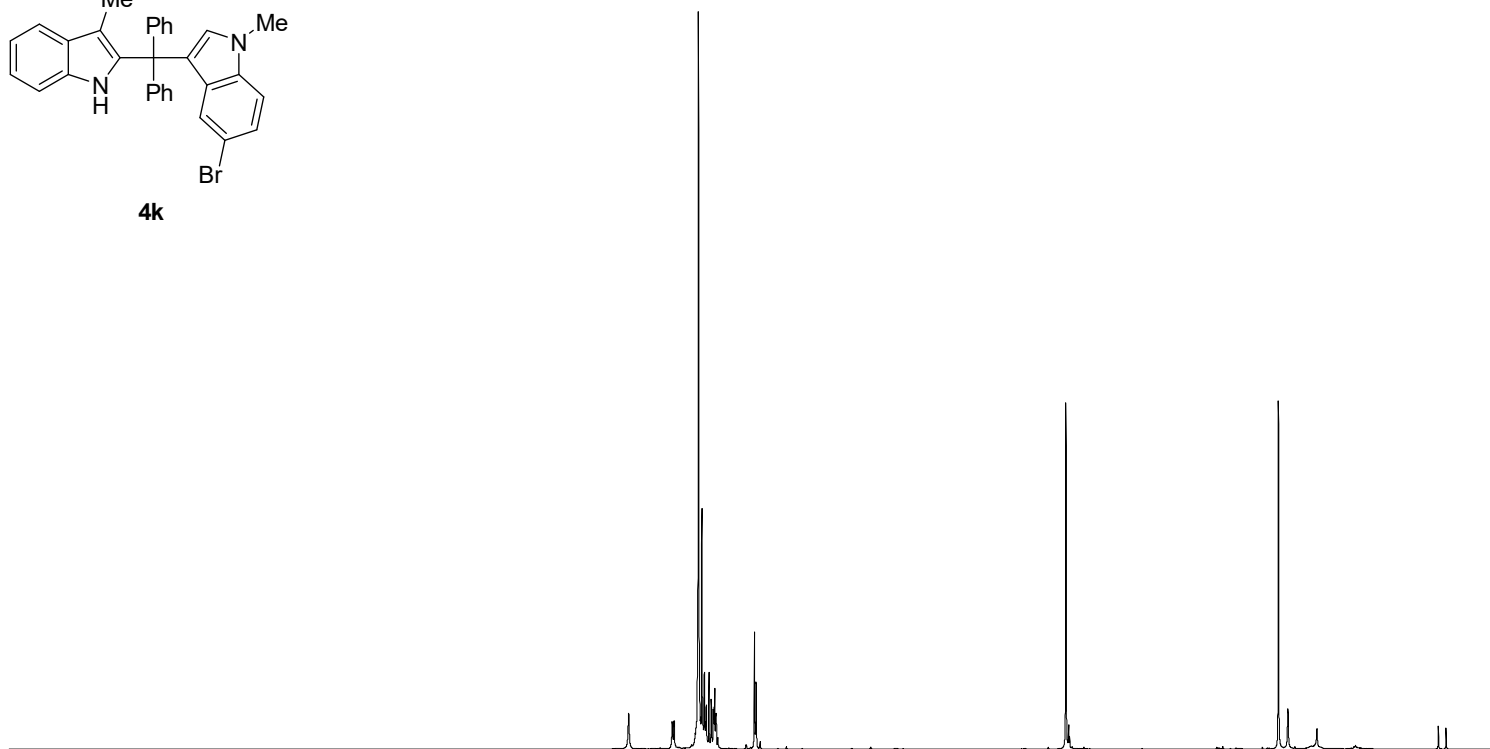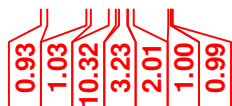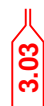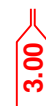



ncc-2-89-2

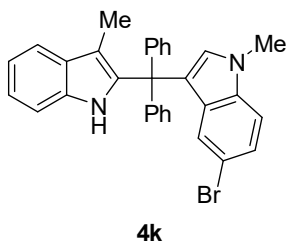

144.06  
138.37  
136.65  
133.70  
131.56  
130.28  
130.06  
129.17  
128.09  
126.82  
124.78  
124.26  
121.39  
120.05  
119.21  
118.31  
112.82  
110.99  
110.90  
109.23

77.47  
77.15  
76.84

55.15

33.15

10.32

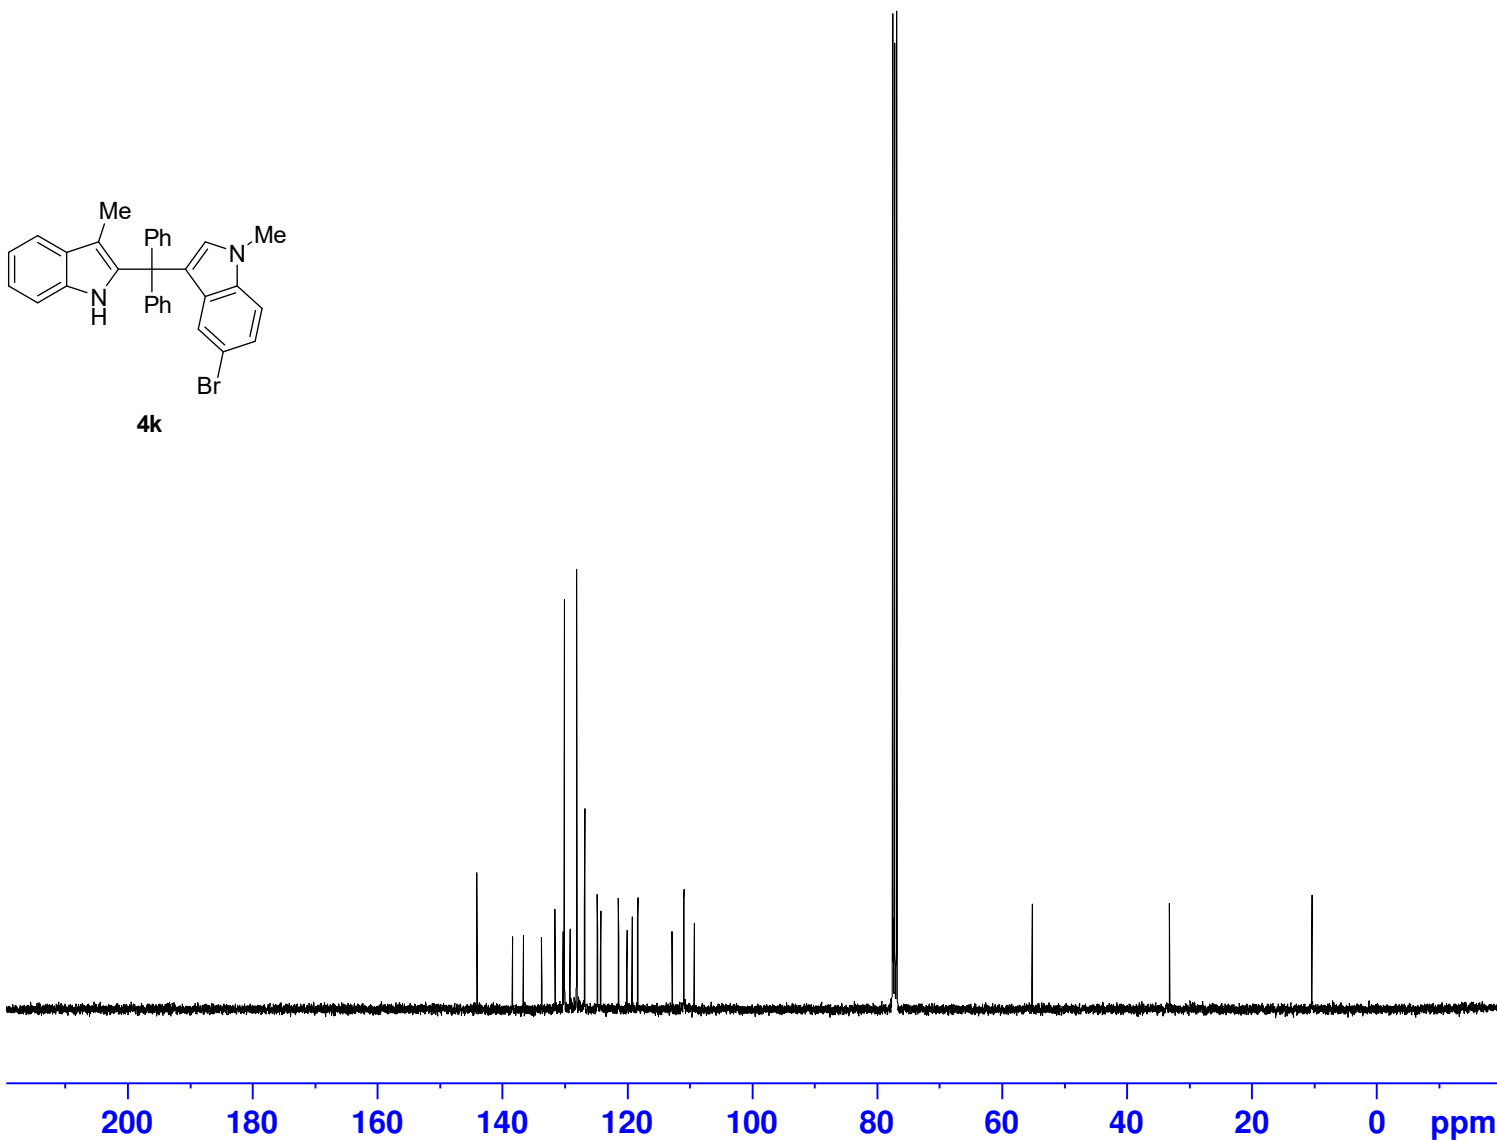

Current Data Parameters  
NAME 20231101-400M  
EXPNO 26  
PROCNO 1

F2 - Acquisition Parameters  
Date\_ 20231031  
Time 23.42  
INSTRUM spect  
PROBHD 5 mm PADUL 13C  
PULPROG zgpg30  
TD 65536  
SOLVENT CDCl3  
NS 400  
DS 4  
SWH 24038.461 Hz  
FIDRES 0.366798 Hz  
AQ 1.3631488 sec  
RG 37.77  
DW 20.800 usec  
DE 6.50 usec  
TE 292.9 K  
D1 2.00000000 sec  
D11 0.03000000 sec  
TD0 1

==== CHANNEL f1 =====  
NUC1 13C  
P1 9.80 usec  
PLW1 47.40000153 W  
SFO1 100.6379178 MHz

==== CHANNEL f2 =====  
CPDPRG[2] waltz16  
NUC2 1H  
PCPD2 90.00 usec  
PLW2 23.00000000 W  
PLW12 0.30712000 W  
PLW13 0.24877000 W  
SFO2 400.1916008 MHz

F2 - Processing parameters  
SI 32768  
SF 100.6278484 MHz  
WDW EM  
SSB 0  
LB 1.00 Hz  
GB 0  
PC 1.40

ncc-2-90-2



Current Data Parameters  
NAME 20231031-400M  
EXPNO 18  
PROCNO 1

F2 - Acquisition Parameters  
Date\_ 20231030  
Time 23.14  
INSTRUM spect  
PROBHD 5 mm PADUL 13C  
PULPROG zg30  
TD 65536  
SOLVENT CDC13  
NS 6  
DS 2  
SWH 8223.685 Hz  
FIDRES 0.125483 Hz  
AQ 3.9845889 sec  
RG 113.67  
DW 60.800 usec  
DE 6.50 usec  
TE 293.4 K  
D1 1.00000000 sec  
TD0 1

==== CHANNEL f1 =====  
NUC1 1H  
P1 9.90 usec  
PLW1 23.00000000 W  
SFO1 400.1924713 MHz

F2 - Processing parameters  
SI 65536  
SF 400.1900235 MHz  
WDW EM  
SSB 0  
LB 0.30 Hz  
GB 0  
PC 1.00

8.074  
7.504  
7.493  
7.484  
7.236  
7.222  
7.204  
7.190  
7.178  
7.172  
7.159  
7.140  
7.120  
7.097  
7.081  
7.072  
7.062  
7.047  
6.938  
6.918  
6.451  
6.314  
6.294  
  
3.660  
2.953  
1.609

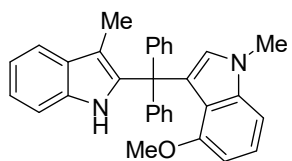

4I

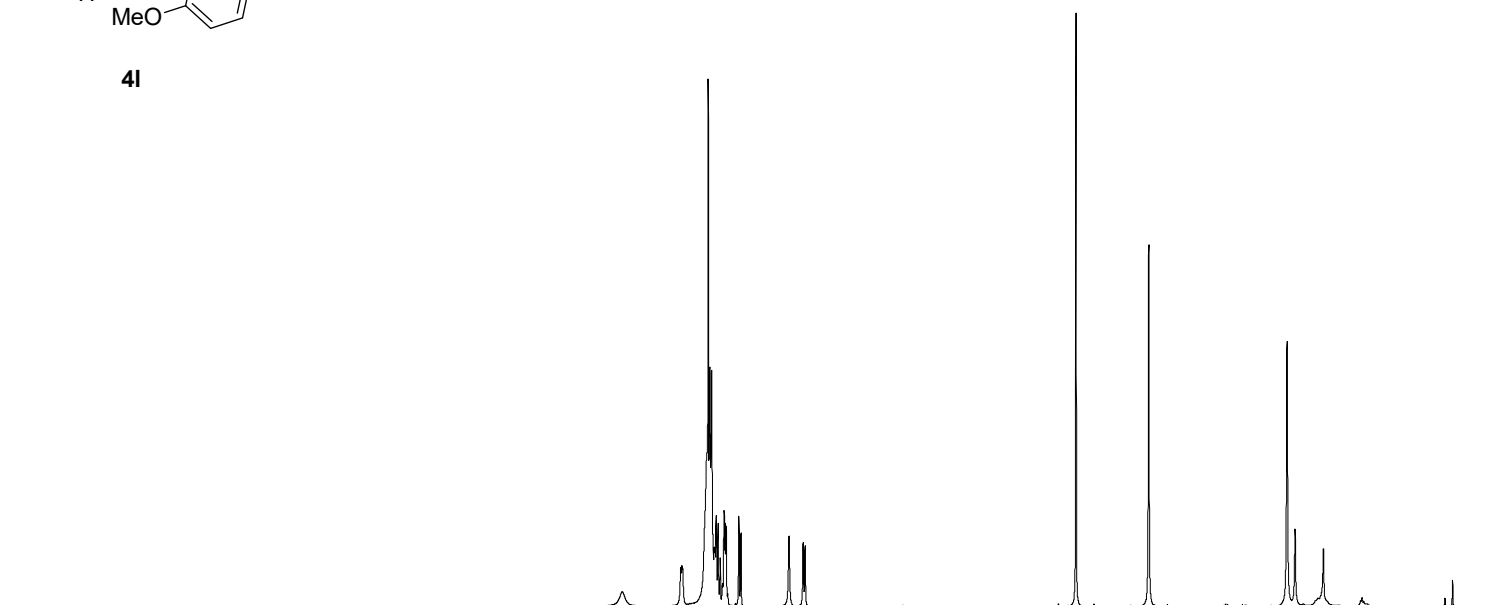

13 12 11 10 9 8 7 6 5 4 3 2 1 ppm

0.93  
1.03  
12.59  
2.03  
1.00  
1.01  
1.00  
  
3.04  
3.03  
3.00

ncc-2-90-2



Current Data Parameters  
NAME 20231031-400M  
EXPNO 19  
PROCNO 1

F2 - Acquisition Parameters  
Date\_ 20231030  
Time 23.44  
INSTRUM spect  
PROBHD 5 mm PADUL 13C  
PULPROG zgpg30  
TD 65536  
SOLVENT CDC13  
NS 500  
DS 4  
SWH 24038.461 Hz  
FIDRES 0.366798 Hz  
AQ 1.3631488 sec  
RG 35.06  
DW 20.800 usec  
DE 6.50 usec  
TE 293.3 K  
D1 2.00000000 sec  
D11 0.03000000 sec  
TD0 1

==== CHANNEL f1 =====  
NUC1 13C  
P1 9.80 usec  
PLW1 47.40000153 W  
SFO1 100.6379178 MHz

==== CHANNEL f2 =====  
CPDPRG[2] waltz16  
NUC2 1H  
PCPD2 90.00 usec  
PLW2 23.00000000 W  
PLW12 0.30712000 W  
PLW13 0.24877000 W  
SFO2 400.1916008 MHz

F2 - Processing parameters  
SI 32768  
SF 100.6278560 MHz  
WDW EM  
SSB 0  
LB 1.00 Hz  
GB 0  
PC 1.40

153.84  
145.90  
139.90  
133.74  
130.31  
130.21  
130.07  
130.03  
127.31  
125.93  
122.95  
120.75  
118.64  
117.99  
117.89  
110.49  
108.50  
102.38  
100.43  
77.39  
77.07  
76.75  
55.97  
54.30  
33.11  
10.41

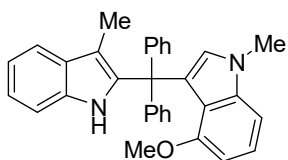

4l

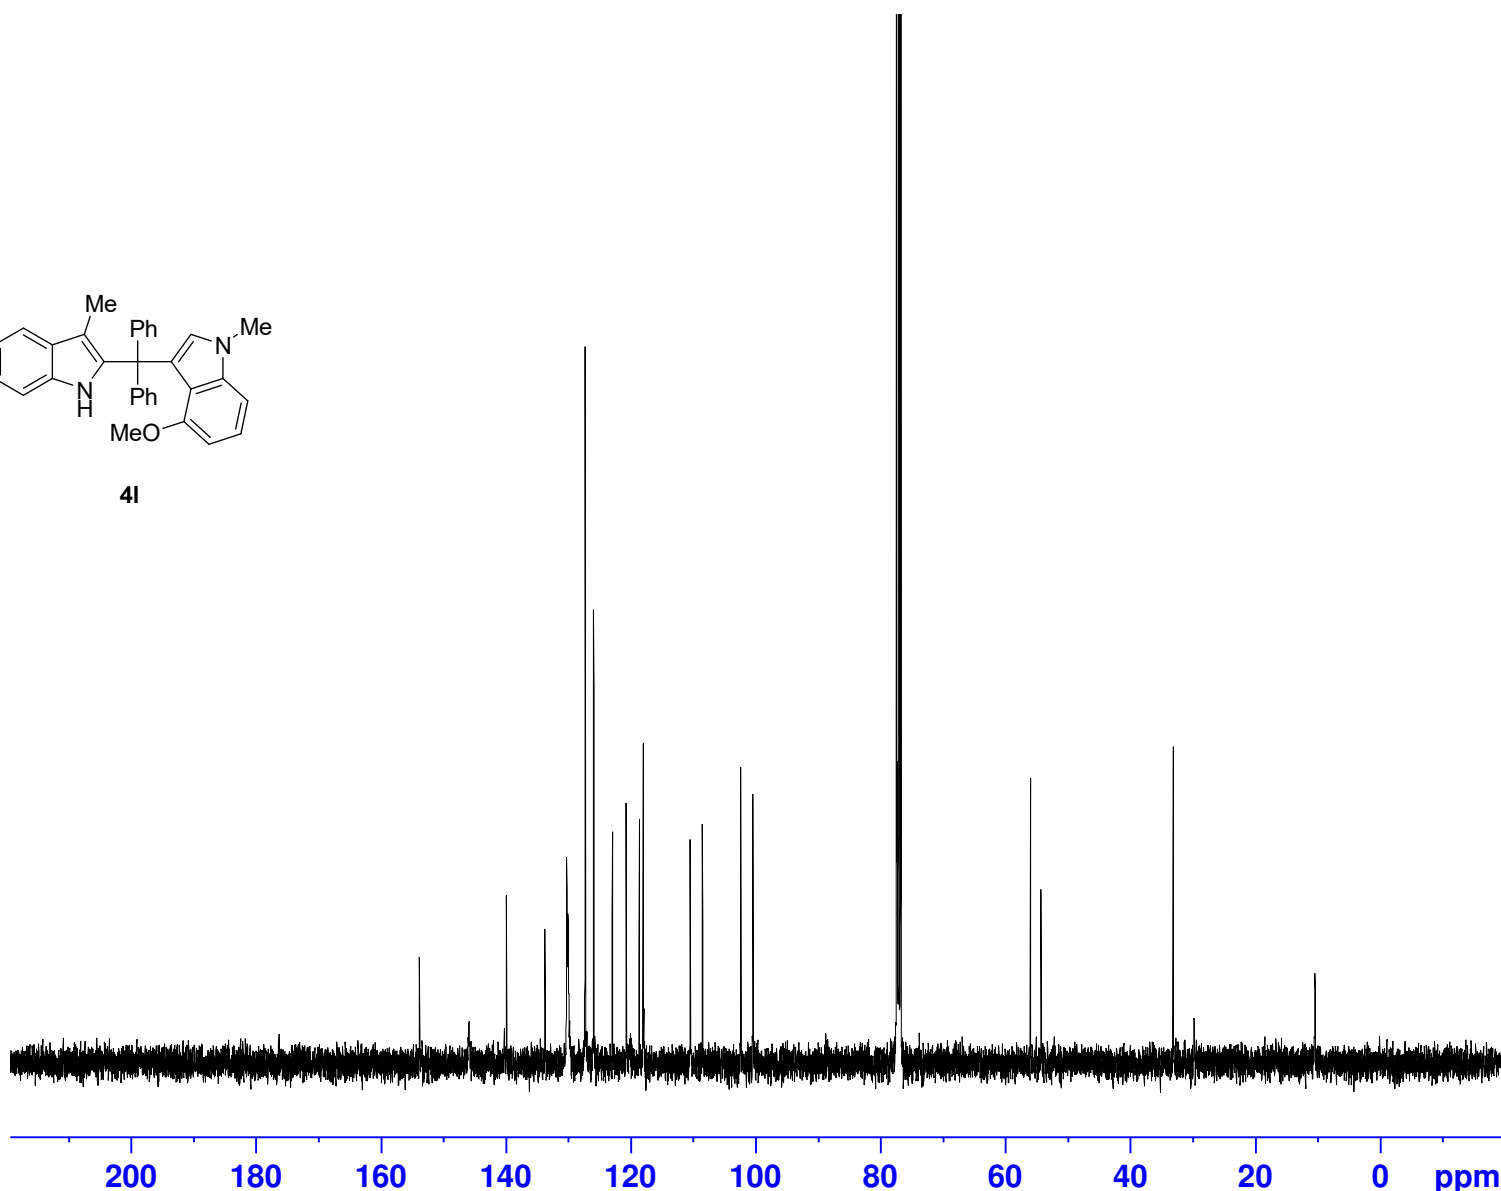

ncc-4-26



Current Data Parameters  
NAME 20240408-400M  
EXPNO 33  
PROCNO 1

F2 - Acquisition Parameters  
Date\_ 20240408  
Time 4.04  
INSTRUM spect  
PROBHD 5 mm PADUL 13C  
PULPROG zg30  
TD 65536  
SOLVENT CDCl3  
NS 6  
DS 2  
SWH 8223.685 Hz  
FIDRES 0.125483 Hz  
AQ 3.9845889 sec  
RG 113.67  
DW 60.800 usec  
DE 6.50 usec  
TE 293.7 K  
D1 1.00000000 sec  
TD0 1

==== CHANNEL f1 =====  
NUC1 1H  
P1 9.90 usec  
PLW1 23.00000000 W  
SFO1 400.1924713 MHz

F2 - Processing parameters  
SI 65536  
SF 400.1900142 MHz  
WDW EM  
SSB 0  
LB 0.30 Hz  
GB 0  
PC 1.00

8.004  
7.773  
7.578  
7.560  
7.355  
7.348  
7.334  
7.315  
7.300  
7.285  
7.281  
7.260  
7.246  
7.233  
7.229  
7.214  
7.183  
7.169  
7.166  
7.155  
7.151  
7.137  
7.134  
7.119  
6.765  
6.761  
6.240  
6.232  
6.225  
6.218  
6.048

1.711

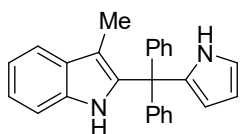

5a

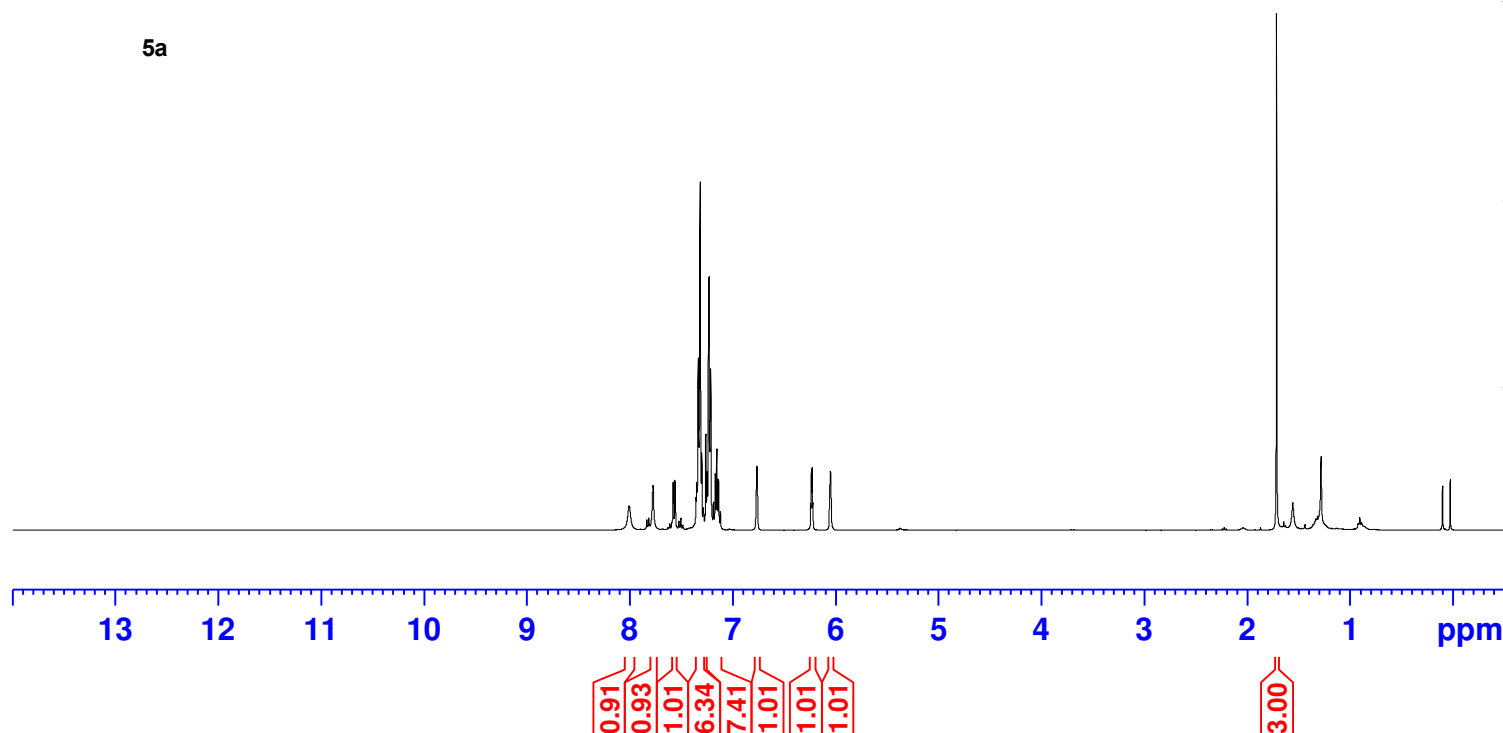

ncc-4-26

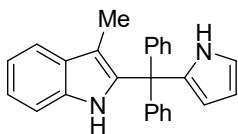

5a

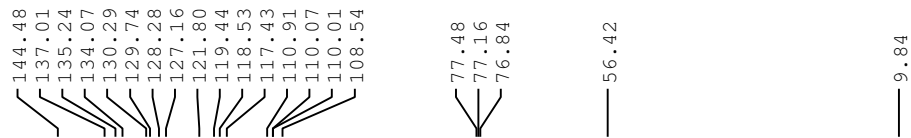

Current Data Parameters  
NAME 20240408-400M  
EXPNO 34  
PROCNO 1

F2 - Acquisition Parameters  
Date\_ 20240408  
Time 4.51  
INSTRUM spect  
PROBHD 5 mm PADUL 13C  
PULPROG zgpg30  
TD 65536  
SOLVENT CDC13  
NS 800  
DS 4  
SWH 24038.461 Hz  
FIDRES 0.366798 Hz  
AQ 1.3631488 sec  
RG 37.77  
DW 20.800 usec  
DE 6.50 usec  
TE 294.2 K  
D1 2.00000000 sec  
D11 0.03000000 sec  
TD0 1

==== CHANNEL f1 =====  
NUC1 13C  
P1 9.80 usec  
PLW1 47.40000153 W  
SFO1 100.6379178 MHz

==== CHANNEL f2 =====  
CPDPRG[2] waltz16  
NUC2 1H  
PCPD2 90.00 usec  
PLW2 23.00000000 W  
PLW12 0.30712000 W  
PLW13 0.24877000 W  
SFO2 400.1916008 MHz

F2 - Processing parameters  
SI 32768  
SF 100.6278469 MHz  
WDW EM  
SSB 0  
LB 1.00 Hz  
GB 0  
PC 1.40

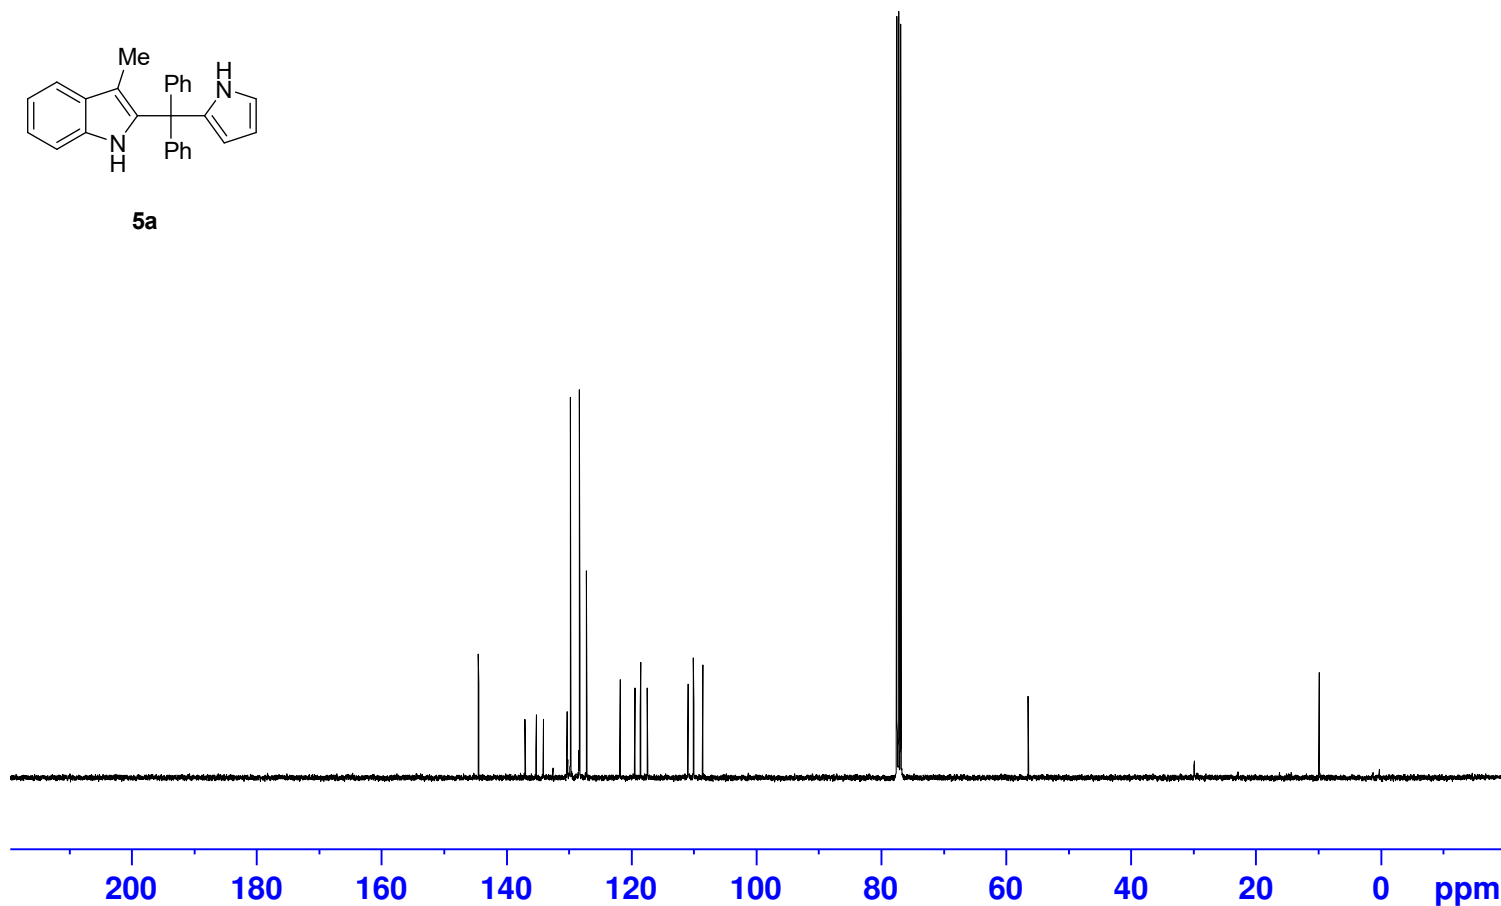

ncc-3-90



Current Data Parameters  
NAME 20240302-400M  
EXPNO 18  
PROCNO 1

F2 - Acquisition Parameters  
Date\_ 20240301  
Time 22.56  
INSTRUM spect  
PROBHD 5 mm PADUL 13C  
PULPROG zg30  
TD 65536  
SOLVENT CDC13  
NS 8  
DS 2  
SWH 8223.685 Hz  
FIDRES 0.125483 Hz  
AQ 3.9845889 sec  
RG 100.49  
DW 60.800 usec  
DE 6.50 usec  
TE 294.6 K  
D1 1.00000000 sec  
TD0 1

==== CHANNEL f1 =====  
NUC1 1H  
P1 9.90 usec  
PLW1 23.00000000 W  
SFO1 400.1924713 MHz

F2 - Processing parameters  
SI 65536  
SF 400.1900138 MHz  
WDW EM  
SSB 0  
LB 0.30 Hz  
GB 0  
PC 1.00

7.818  
7.665  
7.593  
7.575  
7.573  
7.351  
7.336  
7.317  
7.300  
7.285  
7.281  
7.260  
7.248  
7.232  
7.194  
7.180  
7.177  
7.162  
7.148  
7.145  
7.130  
5.880  
5.874

2.244  
1.731

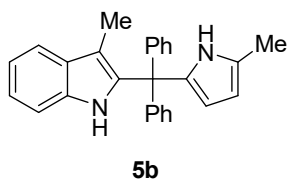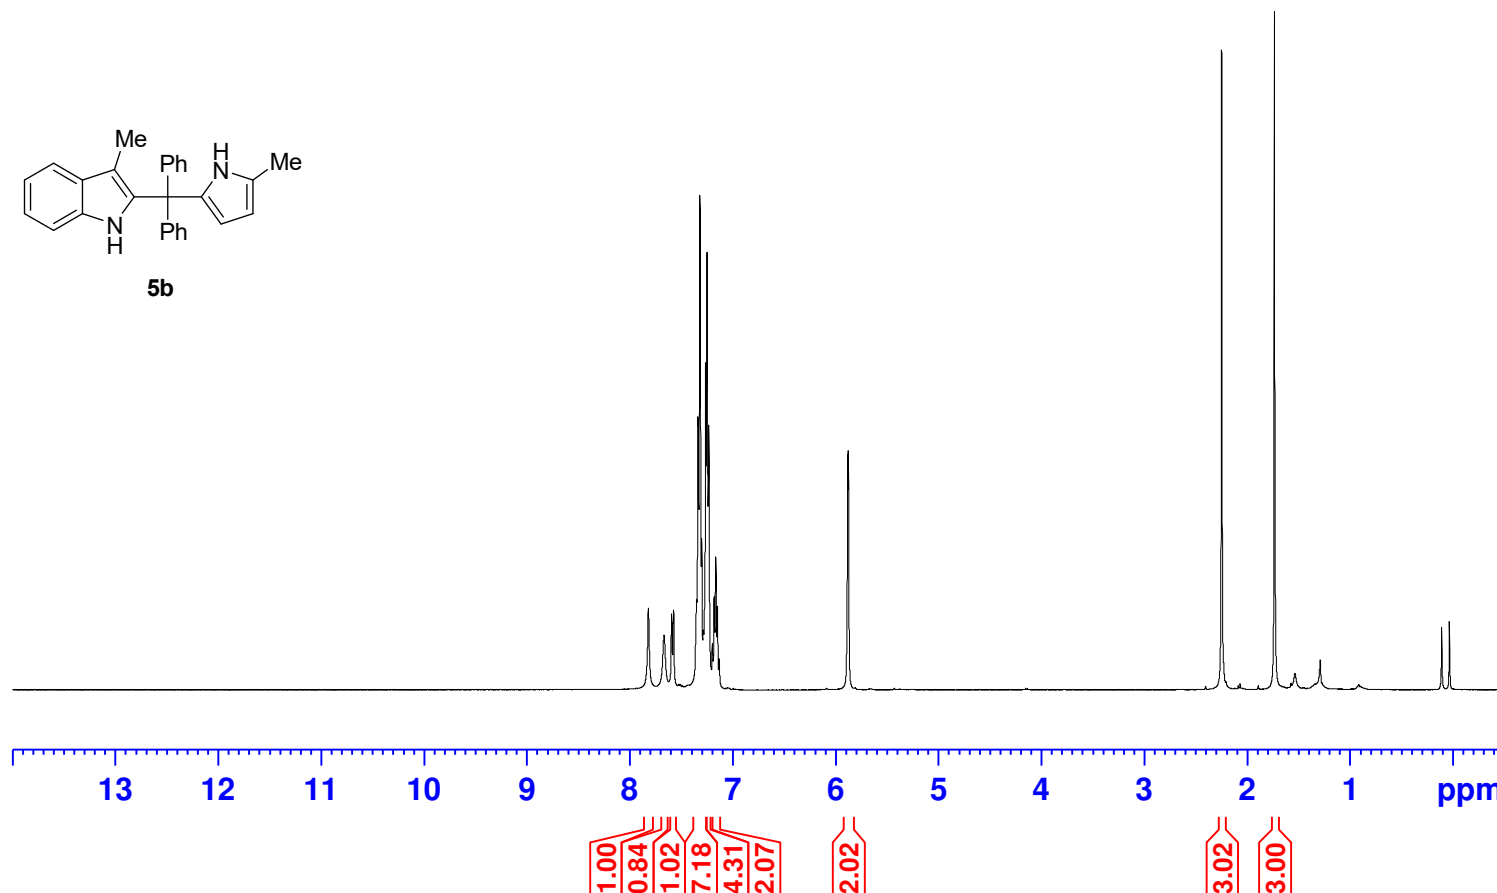

ncc-3-90

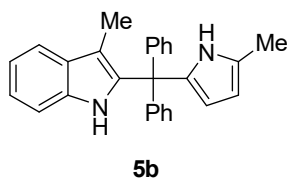

144.57  
137.17  
134.05  
133.61  
130.33  
129.74  
128.21  
127.52  
127.06  
121.72  
119.38  
118.53  
110.89  
110.30  
109.91  
106.16

77.47  
77.16  
76.84

56.42

13.36  
9.95

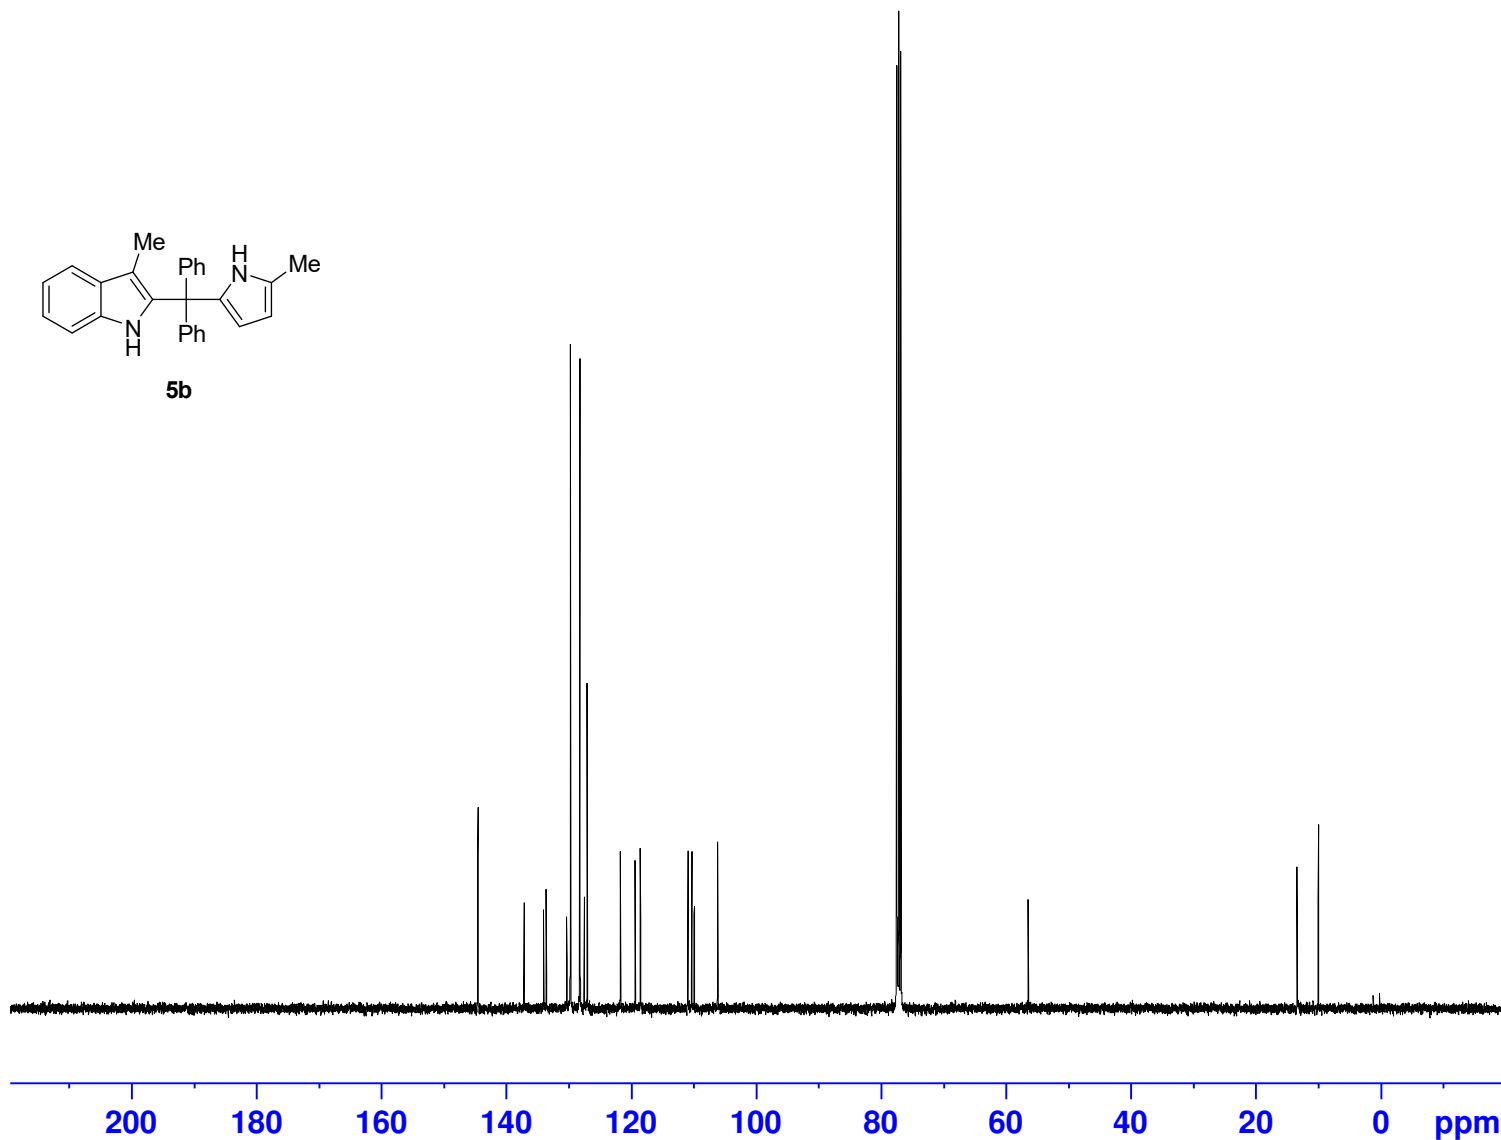

Current Data Parameters  
NAME 20240302-400M  
EXPNO 19  
PROCNO 1

F2 - Acquisition Parameters  
Date\_ 20240301  
Time 23.32  
INSTRUM spect  
PROBHD 5 mm PADUL 13C  
PULPROG zgpg30  
TD 65536  
SOLVENT CDCl3  
NS 600  
DS 4  
SWH 24038.461 Hz  
FIDRES 0.366798 Hz  
AQ 1.3631488 sec  
RG 29.75  
DW 20.800 usec  
DE 6.50 usec  
TE 295.2 K  
D1 2.00000000 sec  
D11 0.03000000 sec  
TD0 1

==== CHANNEL f1 =====  
NUC1 13C  
P1 9.80 usec  
PLW1 47.40000153 W  
SFO1 100.6379178 MHz

==== CHANNEL f2 =====  
CPDPRG[2] waltz16  
NUC2 1H  
PCPD2 90.00 usec  
PLW2 23.00000000 W  
PLW12 0.30712000 W  
PLW13 0.24877000 W  
SFO2 400.1916008 MHz

F2 - Processing parameters  
SI 32768  
SF 100.6278477 MHz  
WDW EM  
SSB 0  
LB 1.00 Hz  
GB 0  
PC 1.40
